RESEARCH ARTICLE

# Associations between body size, nutrition and socioeconomic position in early life and the epigenome: A systematic review

Jane Maddock<sup>1\*</sup>, Wahyu Wulaningsih<sup>1</sup>, Juan Castillo Fernandez<sup>2</sup>, George B. Ploubidis<sup>3</sup>, Alissa Goodman<sup>3</sup>, Jordana Bell<sup>2</sup>, Diana Kuh<sup>1</sup>, Rebecca Hardy<sup>1</sup>

**1** MRC Unit for Lifelong Health and Ageing, Institute of Cardiovascular Science, University College London, London, United Kingdom, **2** Department of Twin Research and Genetic Epidemiology, King's College London, London, United Kingdom, **3** Centre for Longitudinal Studies, UCL Institute of Education, University College London, London, United Kingdom

\* [jane.maddock@ucl.ac.uk](mailto:jane.maddock@ucl.ac.uk)

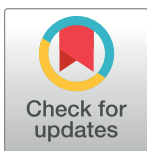

## Abstract

### OPEN ACCESS

**Citation:** Maddock J, Wulaningsih W, Fernandez JC, Ploubidis GB, Goodman A, Bell J, et al. (2018) Associations between body size, nutrition and socioeconomic position in early life and the epigenome: A systematic review. *PLoS ONE* 13(8): e0201672. <https://doi.org/10.1371/journal.pone.0201672>

**Editor:** Taulant Muka, Erasmus MC, NETHERLANDS

**Received:** April 26, 2018

**Accepted:** July 18, 2018

**Published:** August 10, 2018

**Copyright:** © 2018 Maddock et al. This is an open access article distributed under the terms of the [Creative Commons Attribution License](https://creativecommons.org/licenses/by/4.0/), which permits unrestricted use, distribution, and reproduction in any medium, provided the original author and source are credited.

**Data Availability Statement:** All relevant data are within the paper and its Supporting Information files.

**Funding:** This work is supported by the ESRC and BBSRC [ES/N000404/1 to J.B.] and the Medical Research Council [MC\_UU\_12019/1, MC\_UU\_12019/2]. The funders had no role in study design, data collection and analysis, decision to publish, or preparation of the manuscript.

## Background

Body size, nutrition and socioeconomic position (SEP) in early life have been associated with a wide range of long-term health effects. Epigenetics is one possible mechanism through which these early life exposures can impact later life health. We conducted a systematic review examining the observational evidence for the impact of body size, nutrition and SEP in early life on the epigenome in humans.

## Methods

This systematic review is registered with the PROSPERO database (registration number: CRD42016050193). Three datasets were simultaneously searched using Ovid and the resulting studies were evaluated by at least two independent reviewers. Studies measuring epigenetic markers either at the same time as, or after, the early life exposure and have a measure of body size, nutrition or SEP in early life (up to 12 years), written in English and from a community-dwelling participants were included.

## Results

We identified 90 eligible studies. Seventeen of these papers examined more than one early life exposure of interest. Fifty six papers examined body size, 37 nutrition and 17 SEP. All of the included papers examined DNA methylation (DNAm) as the epigenetic marker. Overall there was no strong evidence for a consistent association between these early life variables in DNAm which may be due to the heterogeneous study designs, data collection methods and statistical analyses.

**Competing interests:** The authors have declared that no competing interests exist.

## Conclusions

Despite these inconclusive results, the hypothesis that the early life environment can impact DNAm, potentially persisting into adult life, was supported by some studies and warrants further investigation. We provide recommendations for future studies.

## Introduction

Substantial evidence from the field of life course epidemiology has supported a relationship between physical and social exposures across the entire life course and later life health [1]. Rapid growth and development that occurs in early life marks a sensitive period during which external factors can influence an individual's later life health [2–4]. Evidence has accumulated for the importance of nutrition and growth in utero and early postnatal life on a wide range of health and ageing outcomes such as cardiometabolic and bone health [5]. Childhood socioeconomic position (SEP) has also been found to be associated with a wide range of later life health outcomes [6, 7].

Exposures in early life must impact the organism in order for their effects to manifest after a long latency period. The biological, behavioural and psychosocial mechanisms linking these earlier life exposures with later life health are complex [1, 3]. Epigenetics is one possible mechanism [3, 8–10]. Epigenetics refers to processes that regulate gene expression but do not change the underlying DNA sequence. These tissue and cell-specific processes include DNA methylation (DNAm), histone modification, other changes to chromatin structure, and post-transcriptional control [3]. Genetic variation, stochastic events as well as the environment have been shown to influence the epigenome [11]. Since these epigenetic processes can persist during mitosis, it is feasible that early life exposures influencing the epigenome may have a phenotypic manifestation in later life [9].

A number of early life exposures have been investigated in relation to epigenetics. Animal studies have made a convincing case for the role of nutrition during fetal and early neonatal growth on epigenetics [12, 13]. DNA or histone methylation in offspring in these studies has been shown to be particularly susceptible to maternal dietary intake of folate, vitamin B6 (pyridoxine), vitamin B12 (cobalamin), vitamin B2 (riboflavin), choline and methionine. These nutrients are involved in one-carbon metabolism, influencing the amount of available S-adenosylmethionine and co-enzymes which are required for methylation [14]. In human studies, participants who were affected by the Dutch Famine provide evidence for the lasting impact of severe caloric restriction during particular periods of gestation [12, 15]. The role of nutrition on epigenetics beyond this fetal and early neonatal period is less studied [12]. Growth and body size in early life are related to nutrition, and indeed there is also evidence for predominantly cross-sectional associations between birth weight, childhood and adolescence BMI/obesity, body composition and DNA methylation from human studies [15]. The small number of human studies also suggest a role for early life SEP on DNA methylation [15].

Since this is a relatively new and rapidly developing area of research, most evidence examining the epigenetic effect of these key early life factors have come from animal and exploratory studies incorporating a variety of early life exposures and applying different analytical methods. In 2015 Demetriou *et al.* conducted a non-systematic review of the evidence for early-life nutrition, SEP and overweight/obesity on DNA methylation [15]. In 2017, Hartwig *et al.* systematically reviewed the literature of the effects of breastfeeding on DNA methylation [16]. To the best of our knowledge, there has been no comprehensive systematic review of the potential

effects of the key early life exposures of nutrition, body size and SEP on epigenetic processes. Therefore, the aim of this study was to systematically review the literature on the association between 1) body size and growth in early life 2) nutrition during pregnancy and early life 3) markers of SEP in early life on epigenetic processes in human studies. This will provide information on the potential for epigenetics to mediate the association between these early life exposures and later life health.

## Methods

This systematic review is registered with the PROSPERO database (registration number: CRD42016050193) and the protocol has been published in a peer-review journal [17].

### Eligibility criteria

We included studies that tested the association between any measure of (i) body size or growth in early life, (ii) nutrition during pregnancy or early life, or (iii) SEP in early life on epigenetics in human samples. We defined early life as 12 years and under to capture exposures during the pre-adolescent period including prenatal, infancy, early and middle childhood. We considered any indicator of DNAm or histone modification measured in any tissue as an outcome. Early life factors could be prospectively measured or recorded, or retrospectively recalled at later data collections. Eligible measures of body size were weight, height, BMI, and head circumference at birth or any stage in early life or change in any of these measurements. Nutrition included any measure of maternal nutrition, supplement use and/or diet during pregnancy, breastfeeding/formula, weaning practices and nutrition/diet of the child in early life measured using dietary questionnaires and/or objectively by nutritional biomarkers. Eligible measures of SEP included any recognised indicator of SEP within society, including occupation, education, income, occupational or social class, poverty, and household overcrowding, as defined by Krieger *et al.* [18].

Reviews, clinical trials, animal studies, studies assessing the effect of adulthood exposures on epigenetic markers and those assessing the epigenetic marker before the early life measure were excluded. Studies in samples with a specific clinical condition were excluded. Studies were only included if they were published in the English language in peer-reviewed journals.

### Search strategy

We performed a systematic review of the literature in March 2017. Using OvidSP as the database interface, a joint electronic search on MEDLINE and Embase was conducted. We searched BIOSIS database using ISI Web of Science. The search used free-text search terms (S1 Table) with truncations to allow for different spellings, proximity operators ('adj' in OvidSP, 'NEAR' in ISI Web of Science) and joined using Boolean logic ("AND", "OR"). The reference lists' of relevant reviews, all included papers and their ISI citation index (via Web of Science) was searched for studies meeting inclusion criteria. Given the extensive number of studies identified using these databases; we did not search grey literature. Eligible studies identified were combined with the electronic search results.

### Study selection and data extraction

All abstracts were screened independently for eligibility by two researchers (from JM, WW and RH). The full text of all potentially eligible papers was also double screened by JM, RH, WW and JCF and reasons for their exclusion were documented. Disagreements about the paper's eligibility were resolved through discussion and if necessary, a third reviewer.

The following information was extracted from selected papers: citation details, study details (including type, country/region and sample size), participant details (including age and sex), and exposure and outcome details (including details on methods used). A free-text box for recording main findings was used because of the expected heterogeneous methods that will have been used.

The following aspects of the paper which may relate to the quality of each study were extracted: study type, methods used to measure epigenetics, statistical analysis (including adjustment of relevant confounders), recall bias such as prospective or retrospective measures of early life factors, and generalisability [19].

Due to the diversity in eligible studies in terms of methods used, a meta-analysis was not conducted [19]. Therefore, a narrative synthesis was undertaken [20].

## Results

Overall we identified 90 eligible papers (Fig 1 and Tables 1–3). Seventeen of these papers examined more than one early life exposure of interest. All of the included papers examined DNAm as the epigenetic marker with none examining histone modifications. Results of each of these papers will be outlined below according to the main exposure of interest.

### Body size and growth in early life

Of the included papers,  $n = 56$  examined the role of body size and growth in early life on DNAm (Table 1). There were 14 prospective (3 of which compared extreme groups), 33 cross-sectional (6 of which compared extreme groups), and 9 twin studies.

**Prospective studies of body size and growth in early life and DNA methylation.** Thirteen prospective papers examined size at birth [53, 55, 56, 58–62, 64–66, 77, 78], one paper body size in childhood [58], and two growth [59, 67].

**Body size at birth:** Three papers examined body size at birth in relation to childhood and adolescent genome-wide methylation using the Illumina Human-Methylation450 or Human-Methylation27 BeadChip array [55, 58, 77]. Agha *et al.* demonstrated that birth weight-for-gestational age (GA) was associated with methylation at 34 CpGs of which 4 of these CpGs remained at age 7–10 years in 235 children. Three of these CpGs were located on *PBX1* (embryonic development regulator) and one was on *NOS1AP* (neuronal nitric oxidase synthase) [55]. In the Accessible Resource for Integrated Epigenomic Studies cohort (ARIES, a sub sample of The Avon Longitudinal Study of Parents and Children (ALSPAC) cohort), birth weight was not associated with genome-wide DNA methylation in blood when the children were aged 7 and 17 years old [77]. However, analyses in the ARIES cohort did find that birth weight was associated with age acceleration based on Horvath's clock (i.e. residuals from regression of epigenetic age on actual age) at birth, 7 and 17 years; a finding that was replicated in an independent cohort [58].

Two studies examined associations between body size at birth and global DNA methylation in adulthood [59, 60]. Rerkasem *et al.* found no associations between birth weight or birth length and blood methylation at LINE-1 or Alu in 249 20 year old adults [59]. In the other paper, global methylation measured in blood at age 38–48 years using a [<sup>3</sup>H]-methyl acceptance assay, was associated with birth length, but not birth weight [60].

Five papers examined body size at birth and subsequent DNAm in candidate genes [53, 61, 62, 64, 65]. Three of these papers examined methylation in imprinted genes. In the Motherwell Cohort, there was an association between birth length, but not birth weight, and methylation at *IGF2/H19* differentially methylated region (DMR) measured in blood at 40 years [61]. Birth weight was associated with *H19* DMR measured in childhood (~8 years) in girls, but not boys [53] and with methylation at the *IGF2* DMR measured in blood samples of infants aged 17

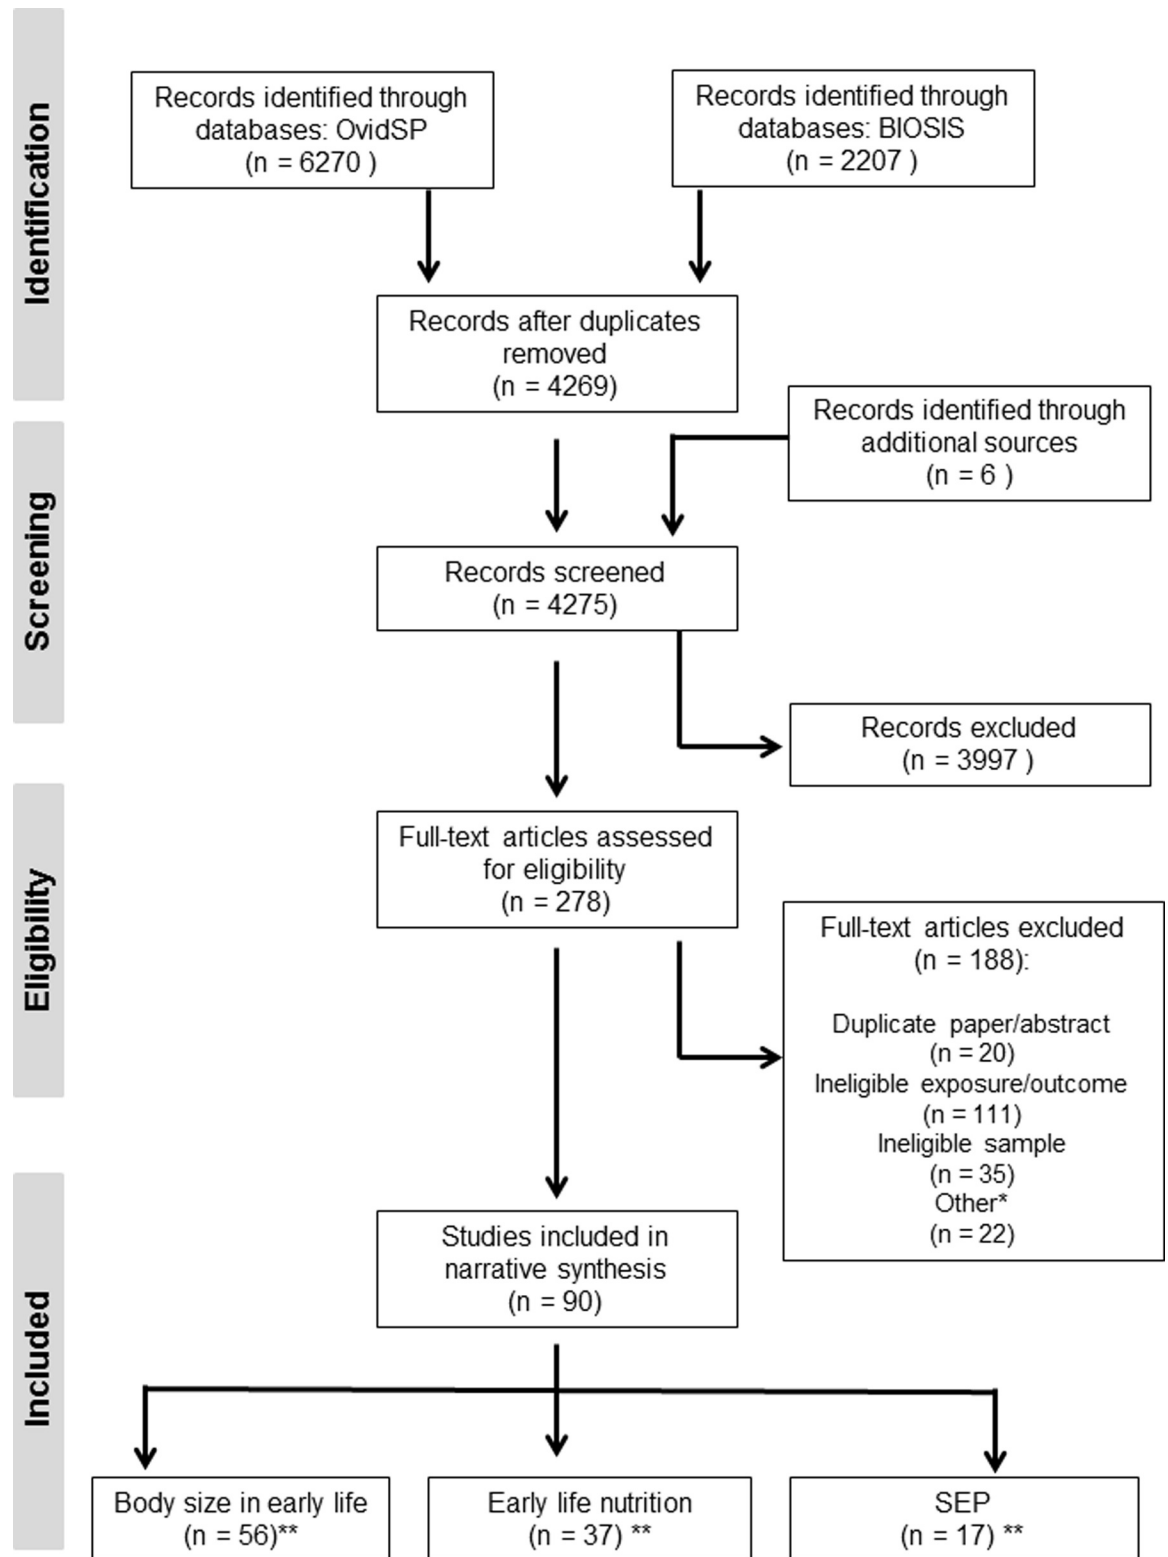

**Fig 1. PRISMA Flow diagram of study selection.** \*Other includes: reviews, not peer reviewed, publication not found, randomised control trials, animal studies \*\*N's including overlapping studies (n = 17).

<https://doi.org/10.1371/journal.pone.0201672.g001>

**Table 1. Body size in early life and epigenetics.** \* (Organised by study design, exposure, DNA methylation (epigenome wide, global methylation, imprinted genes, other genes).

| First author (year), country | Cohort, N (% female)                                       | Early life variable (mean age $\pm$ SD (age range)) | DNA methylation                                                                                                                                                                             | Tissue     | Mean age at epigenetic measure $\pm$ SD (age range) | Main result                                                                                                                                                                                                                                                                                                                                                                                                                                                                                                                                                                                                                                                                                                                                                                                                                                                                                                                                                                                                                                                                                                                                                                                                                                                                                                                                                                                                                                                                                                                                             | Confounders                                                                                                                                                                               |
|------------------------------|------------------------------------------------------------|-----------------------------------------------------|---------------------------------------------------------------------------------------------------------------------------------------------------------------------------------------------|------------|-----------------------------------------------------|---------------------------------------------------------------------------------------------------------------------------------------------------------------------------------------------------------------------------------------------------------------------------------------------------------------------------------------------------------------------------------------------------------------------------------------------------------------------------------------------------------------------------------------------------------------------------------------------------------------------------------------------------------------------------------------------------------------------------------------------------------------------------------------------------------------------------------------------------------------------------------------------------------------------------------------------------------------------------------------------------------------------------------------------------------------------------------------------------------------------------------------------------------------------------------------------------------------------------------------------------------------------------------------------------------------------------------------------------------------------------------------------------------------------------------------------------------------------------------------------------------------------------------------------------------|-------------------------------------------------------------------------------------------------------------------------------------------------------------------------------------------|
| <b>CROSS-SECTIONAL</b>       |                                                            |                                                     |                                                                                                                                                                                             |            |                                                     |                                                                                                                                                                                                                                                                                                                                                                                                                                                                                                                                                                                                                                                                                                                                                                                                                                                                                                                                                                                                                                                                                                                                                                                                                                                                                                                                                                                                                                                                                                                                                         |                                                                                                                                                                                           |
| <b>Body size at birth</b>    |                                                            |                                                     |                                                                                                                                                                                             |            |                                                     |                                                                                                                                                                                                                                                                                                                                                                                                                                                                                                                                                                                                                                                                                                                                                                                                                                                                                                                                                                                                                                                                                                                                                                                                                                                                                                                                                                                                                                                                                                                                                         |                                                                                                                                                                                           |
| Engel (2014), Norway [21]    | MoBa, 1,046 (46)                                           | Birth weight, (Birth, GAD 96% $\geq$ 42w)           | Infinium Human Methylation450 BeadChip                                                                                                                                                      | Cord blood | Birth (GAD 96% $\geq$ 42w)                          | Adjusted mean difference (SE) in birth weight (g) per log increase in methylation fraction of CpGs at Bonferroni significance $P < 0.05$ ( $5 \times 10^{-7}$ ):<br>cg25953130 (gene: ARID5B): $-371.3$ (58.1), $p = 8.11 \times 10^{-5}$<br>cg08005122 (gene: NA): $-493.4$ (83.7), $p = 1.82 \times 10^{-3}$<br>cg20076442 (gene: NA): $-302.8$ (51.6), $p = 2.17 \times 10^{-3}$<br>cg22863179 (gene: ARID5B): $-341.0$ (59.3), $p = 4.33 \times 10^{-3}$<br>cg25124943 (gene: NA): $-480.2$ (89.5), $p = 3.96 \times 10^{-2}$<br>cg00049440 (gene: NA): $-314.3$ (58.7), $p = 4.14 \times 10^{-2}$<br>cg02194129 (gene: XRC3): $726.6$ (96.3), $p = 2.24 \times 10^{-8}$<br>cg17836177 (gene: PEBP4): $558.4$ (93.1), $p = 9.61 \times 10^{-4}$<br>cg12798040 (gene: XRC3): $326.3$ (54.3), $p = 1.21 \times 10^{-3}$<br>cg0060577 (gene: SEM64A): $728.3$ (122.9), $p = 1.50 \times 10^{-3}$<br>cg14172849 (gene: XRC3): $660.4$ (112.6), $p = 2.17 \times 10^{-3}$<br>cg2127322 (gene: SPON2): $323.1$ (56.7), $p = 5.97 \times 10^{-3}$<br>cg25162533 (gene: NA): $382.7$ (68.3), $p = 1.01 \times 10^{-2}$<br>cg23369670 (gene: XRC3): $557.3$ (99.7), $p = 1.12 \times 10^{-2}$<br>cg17714703 (gene: UHRF1): $297.0$ (54.1), $p = 1.97 \times 10^{-2}$<br>cg08420923 (gene: ANKRD1): $493.2$ (91.5), $p = 3.45 \times 10^{-2}$<br>cg23327276 (gene: NA): $522.2$ (97.7), $p = 4.12 \times 10^{-2}$<br>cg0599265 (gene: MFSD10): $442.0$ (82.6), $p = 4.23 \times 10^{-2}$<br>cg24693803 (gene: NA): $538.7$ (101.1), $p = 4.84 \times 10^{-2}$ | Child sex, maternal plasma cotinine, parity, maternal age, dietary folate (not including supplements), asthma, GAD, GAD*, pre-eclampsia, season of birth, leucocyte cell-type composition |
| Haworth (2014), UK [22]      | Discovery cohort: 12 (NR) Investigation cohort: 110 (53.2) | BWP: (Birth, median GAD 39.4 (IQR:38.7–40.3w))      | Discovery cohort<br>Infinium Human Methylation450 BeadChip<br>Investigation cohort: PM20D1, MIR886, SDHAP3,<br>FGFR2 using pyrosequencing                                                   | Cord blood | Birth (GAD median: 39.4 (IQR:38.7–40.3w))           | 314 candidate genes with CpG sites associated with BWP. 27 of these genes had $\geq 2$ CpGs associated with BWP. Authors focused on genes with a difference in methylation $\beta$ -value $\geq 0.2$ between low and high BWP groups. Four loci with $\geq 4$ CpG sites were identified: MIR886, PM20D1, SDHAP3, FGFR2. SDHAP3 was not validated using pyrosequencing and therefore not brought forward.<br>Discovery cohort:<br>Pearson's $R^2$ for BWP and methylation $\beta$ -value:<br>PM20D1 (cg07167872): 0.48 (ranging 0.38–0.55 for other CpGs)<br>MIR886 (cg06536614): 0.62<br>FGFR2 (cg18566515): 0.71<br>Investigation cohort:<br>No association between PM20D1 or MIR886 with BWP<br>Median methylation % of FGFR2 across BWP groups $p = 0.005$ .<br>( $p = 0.013$ after correction for multiple testing).<br>low ( $< 15^{th}$ ): 25.7<br>medium ( $> 40^{th}$ – $< 60^{th}$ ): 24.0<br>and high ( $> 85^{th}$ ): 36.5<br>FGFR2 higher among high BWP ( $> 85^{th}$ ) vs all others:<br>cg18566515: $p = 0.004$<br>cg18566515 + 17 bp: $p = 0.027$<br>cg18566515 + 31 bp: $p = 0.008$<br>Proportion of cases with FGFR2 methylation levels below 20%:<br>High BWP group: 7.1% vs all other BWP groups: 33.7%. This suggests that low methylation in FGFR2 is associated with reduced risk of high birth weight.                                                                                                                                                                                                                          |                                                                                                                                                                                           |
| Turan (2012), US [23]        | 70 (44.2)                                                  | Birth weight (Birth)                                | GoldenGate methylation array (1536 CpGs in 700 genes that were selected for their functions in cell growth, proliferation or embryonic development) & Infinium HumanMethylation450 BeadChip | Cord blood | Birth                                               | Correlation ( $R^2$ ) between methylation of mechanism-based candidate genes and birth weight in GoldenGate CpGs ( $n = 22$ ) & Infinium HumanMethylation450 BeadChip CpGs ( $n = 48$ )<br>Gene: GoldenGate CpG ( $R^2$ ), Infinium CpG ( $R^2$ ):<br>IGF1: cg17084217 (0.004), cg25163611 (1.0x10 <sup>-6</sup> ), cg01300542 (0.005)<br>IGF2: cg19714640 (0.097), cg20742835 (0.005), cg22375192 (0.011), cg02166532 (0.006)<br>IGF2: cg10649864 (0.007), cg17626526 (0.040), cg17084217 (0.011), cg02807948 (0.049), cg13756879 (4.0x10 <sup>-6</sup> ), cg20339650 (0.014), cg22956483 (3.0x10 <sup>-6</sup> ), cg0130542 (0.032)<br>IGFBP1: NA: cg06638433 (0.005), cg13877465 (0.019)<br>IGFBP2: NA: cg18234011 (0.005), cg24450631 (0.005)<br>IGFBP3: cg00508334 (3.5x10 <sup>-6</sup> ), cg21413760 (0.062), cg02860543 (0.049), cg19042950 (1.2x10 <sup>-6</sup> ), cg21413760 (0.062), cg02860543 (0.049), cg07148501 (0.009), cg12721534 (0.014), cg00203668 (0.007), cg14556618 (6.4x10 <sup>-6</sup> )                                                                                                                                                                                                                                                                                                                                                                                                                                                                                                                                     | GA                                                                                                                                                                                        |

(Continued)

Table 1. (Continued)

| First author (year), country | Cohort, N (% female) | Early life variable (mean age $\pm$ SD (age range))                     | DNA methylation                                                              | Tissue     | Mean age at epigenetic measure $\pm$ SD (age range) | Main result                                                                                                                                                                                                                                                                                                                                                                                                                                                                                                                                                                                                                                                                                                                                                                                                                                                                                                                                                                                                                                                                                                                                                                                                                                                                                                                                                                                                                                                                                                                                                                                                                                                                                                                                                                                                                                                                                                                                                                                                                                                                                                                                                                                                                                         | Confounders                                                                                                                                                                                                 |
|------------------------------|----------------------|-------------------------------------------------------------------------|------------------------------------------------------------------------------|------------|-----------------------------------------------------|-----------------------------------------------------------------------------------------------------------------------------------------------------------------------------------------------------------------------------------------------------------------------------------------------------------------------------------------------------------------------------------------------------------------------------------------------------------------------------------------------------------------------------------------------------------------------------------------------------------------------------------------------------------------------------------------------------------------------------------------------------------------------------------------------------------------------------------------------------------------------------------------------------------------------------------------------------------------------------------------------------------------------------------------------------------------------------------------------------------------------------------------------------------------------------------------------------------------------------------------------------------------------------------------------------------------------------------------------------------------------------------------------------------------------------------------------------------------------------------------------------------------------------------------------------------------------------------------------------------------------------------------------------------------------------------------------------------------------------------------------------------------------------------------------------------------------------------------------------------------------------------------------------------------------------------------------------------------------------------------------------------------------------------------------------------------------------------------------------------------------------------------------------------------------------------------------------------------------------------------------------|-------------------------------------------------------------------------------------------------------------------------------------------------------------------------------------------------------------|
| Adkins (2012), US [24]       | CANDLE, 201 (45.3)   | Birth weight, (Birth, GAD 39.1E1 (36–41w))                              | Infinium Human Methylation27 BeadChip                                        | Cord blood |                                                     | <p><b>IGFBP1:</b> cg20666158(0.015), cg23864854(0.048); cg05660795(0.033), cg27447599(0.021)</p> <p><b>IGFBP2:</b> cg07828219(0.032), cg17207942(0.035); cg25854162(0.004), cg2618737(6.7x10<sup>-6</sup>)</p> <p><b>IGFBP3:</b> cg12826145(0.023), cg14625938(0.001); cg04796162(0.014), cg05713098(0.027), cg08831744(0.001), cg15898840(0.026), cg22033798(0.029)</p> <p><b>GFBP4:</b> cg05940014(0.054), cg22392383(0.018), cg0512374(0.008)</p> <p><b>IGFBP5:</b> cg00419545(0.066), cg24617085(0.067); cg19008649(0.021), cg22467567(0.001)</p> <p><b>IGFBP6:</b> cg00122038(0.009), cg22732012(0.072); cg01773854(0.051), cg08629913(0.024)</p> <p><b>IGFBP7:</b> cg00431950(0.023), cg16546204(0.026); cg00088422(0.002), cg03876618 (3.3x10<sup>-6</sup>)</p> <p><b>INS:</b> cg13349859(0.001), cg14426263(0.008); cg00613255(0.001), cg03366382(1.0E-04), cg13993218(0.003), cg25336198(0.005)</p> <p><b>INSR:</b> cg05427477(0.002), cg19110381(0.072); NA</p> <p><b>PHLDA2:</b> cg03637064(0.019), cg18242686(0.024); cg04720330 (4.0x10<sup>-6</sup>), cg11961618(0.039), cg14415314(0.001), cg21259253 (4.0x10<sup>-6</sup>), cg26799802(3.0x10<sup>-7</sup>), cg00702231(0.019), cg07077459 (0.035)</p> <p><b>PLAGL1:</b> cg10923987(0.002), cg12757684(0.067); cg08263357(3.8x10<sup>-6</sup>), cg12757684(0.001), cg14161241(0.002), cg17895149(0.001), cg22378065(0.017), cg25350411(0.002), cg00613255(0.007), cg03366382(0.010)</p> <p><b>IGF2/H19:</b> cg25871270(0.001), cg19731870(0.002); NA</p> <p>Methylation levels at these genes explained 26% (GoldenGate) or 46% (Illumina 450k) of birth weight trait variance.</p> <p>GoldenGate machine learning identified six genes (APOE, MSX1, GRII10, PGRMC1, PCSK14, SFAM72) whose methylation level accounted for 78% of the variance in birth weight.</p> <p>Infinium HumanMethylation450 BeadChip machine learning identified seven genes (ATP6A1P1, PRSS21, RCOR1, ANGPT4, CDK2, EYPL, NAT8L) whose methylation level accounted for 70% of the variance in birth weight.</p> <p>The combined model, using methylation levels at all 13 candidate genes identified in both experiments, explains 84% of the variance in birth weight in the sample of 48 individuals</p> | Newborn sex, maternal BMI, race, GA                                                                                                                                                                         |
| Fryer (2011), UK [25]        | 12(92)               | Birth weight, (Birth)                                                   | Infinium Human Methylation27 BeadChip                                        | Cord blood | Birth                                               | <p>No genome-wide significance for change in birth weight per increase in % methylation was reached for any CpG sites at Bonferroni correction <math>p = 1.9 \times 10^{-6}</math></p> <p>Top 10 methylated gene sites:</p> <p><b>GALK1:</b> <math>p = 0.0002</math></p> <p><b>GPR40:</b> <math>p = 0.0002</math></p> <p><b>AQP12A:</b> <math>p = 0.0002</math></p> <p><b>HSD3B2:</b> <math>p = 0.0003</math></p> <p><b>TTL2:</b> <math>p = 0.0003</math></p> <p><b>BZRAP1:</b> <math>p = 0.0004</math></p> <p><b>SIX6:</b> <math>p = 0.0004</math></p> <p><b>TACR2:</b> <math>p = 0.0007</math></p> <p><b>CUL7:</b> <math>p = 0.0008</math></p> <p><b>HOXB2:</b> <math>p = 0.0008</math></p>                                                                                                                                                                                                                                                                                                                                                                                                                                                                                                                                                                                                                                                                                                                                                                                                                                                                                                                                                                                                                                                                                                                                                                                                                                                                                                                                                                                                                                                                                                                                                       |                                                                                                                                                                                                             |
| Lee (2012), US [26]          | THREE, 141 (47)      | Birth weight, (Birth, 87% GAD $\geq 37w$ )                              | Genome-wide DMRs identified using microarray techniques, CHARM 2.0           | Cord blood | Birth                                               | <p>Two clusters were identified following unsupervised hierarchical clustering to identify underlying p-value-derived methylation across the samples. BWP was higher (<math>p = 0.019</math>) in cluster B.</p> <p>304 CpGs associated with BWP (<math>p &lt; 0.05</math>; full results NR)</p> <p>Average residual DNA methylation across top three DMRs associated with birth weight (log<sub>2</sub> [95%CI]):</p> <p><b>NFIX:</b> 2.86 (0.87, 4.84)</p> <p><b>RAP80:</b> -2.89 (-4.43, -1.34)</p> <p><b>MSRB:</b> -3.97 (-5.71, -2.22)</p>                                                                                                                                                                                                                                                                                                                                                                                                                                                                                                                                                                                                                                                                                                                                                                                                                                                                                                                                                                                                                                                                                                                                                                                                                                                                                                                                                                                                                                                                                                                                                                                                                                                                                                      | Surrogate variables estimated via SVA                                                                                                                                                                       |
| Herbstman (2013), US [27]    | CCCEH, 279 (53.4)    | Birth weight, Birth length, Ponderal Index, Head Circumference, (Birth) | Global methylation using MethyIamp Global DNA Methylation Quantification Kit | Cord blood | Birth                                               | <p>Change in birth outcomes per increase in log<sub>2</sub> transformed DNA methylation (95% CI)</p> <p><b>Birth weight:</b> (2; -28.45 (-72.06, 15.16)</p> <p><b>Birth length:</b> (cm): 0.05 (-0.25, 0.35)</p> <p><b>Ponderal Index:</b> (g/m<sup>3</sup>): -0.27 (-0.69, 0.14)</p> <p><b>Head Circumference:</b> (cm): -0.13 (-0.26, 0.006)</p>                                                                                                                                                                                                                                                                                                                                                                                                                                                                                                                                                                                                                                                                                                                                                                                                                                                                                                                                                                                                                                                                                                                                                                                                                                                                                                                                                                                                                                                                                                                                                                                                                                                                                                                                                                                                                                                                                                  | GA, plac, maternal height, pre-pregnancy BMI, maternal age at delivery, ethnicity, sex, public assistance, total polycyclic aromatic hydrocarbons and tobacco smoke, delivery mode (for head circumference) |

(Continued)



Table 1. (Continued)

| First author (year), country               | Cohort, N (% female)                               | Early life variable (mean age $\pm$ SD (age range))       | DNA methylation                                                                                                             | Tissue     | Mean age at epigenetic measure $\pm$ SD (age range) | Main result                                                                                                                                                                                                                                                                                                                                                                                                                                                                        | Confounders                                                                                                                                                                |
|--------------------------------------------|----------------------------------------------------|-----------------------------------------------------------|-----------------------------------------------------------------------------------------------------------------------------|------------|-----------------------------------------------------|------------------------------------------------------------------------------------------------------------------------------------------------------------------------------------------------------------------------------------------------------------------------------------------------------------------------------------------------------------------------------------------------------------------------------------------------------------------------------------|----------------------------------------------------------------------------------------------------------------------------------------------------------------------------|
| Nomura (2014), US [28]                     | 50 (42)                                            | Birth weight, Head circumference, Body length, (Birth)    | Global methylation using LUMA                                                                                               | Cord blood | Birth                                               | Association between global methylation (%) and birth outcomes in multivariate general linear model, $\beta$ (SE), $p$<br>Birth weight: 0.62(0.75), $p = 0.94$<br>Head circumference: 0.02 (0.05), $p = 0.76$<br>Body length: -0.02 (0.09), $p = 0.85$                                                                                                                                                                                                                              | Newborn sex, mother's education, welfare status, maternal status, ethnicity, GA                                                                                            |
| Haggerty (2013), UK [29]                   | 1,073 (NR)                                         | Birth weight, Crown heel length, (Birth, GAD 39 $\pm$ 2w) | LINE-1 (4 CpGs), IGF2 (4 CpGs), PEG3 (7 CpGs), SNRPN (4 CpGs) using pyrosequencing                                          | Cord blood | Birth (GAD 39-2w)                                   | Change in early life variable per % increase methylation (average across CpGs), Coefficient (95% CI):<br>LINE-1<br>Birth weight(g): -13.55 (-27.18,0.09), $p = 0.05$<br>Crown heel length (cm): -0.03 (-0.09, 0.03), $p = 0.33$<br>PEG3<br>Birth weight(g): 3.03 (-7.56,13.63), $p = 0.58$<br>SNRPN<br>Crown heel length (cm): 0.01 (-0.03,0.06), $p = 0.51$<br>IGF2<br>Birth weight(g): -6.08 (-12.22,0.06), $p = 0.05$<br>Crown heel length (cm): -0.02 (-0.04,0.01), $p = 0.22$ | Newborn sex, GA                                                                                                                                                            |
| Michels (2012), US [30]                    | The Epigenetic Birth Cohort, 319 (48)              | Birth weight, (Birth, 88% GAD $\geq$ 37w)                 | LINE-1 using pyrosequencing                                                                                                 | Cord blood | Birth (88% GAD $\geq$ 37w)                          | Difference in % methylation (95% CI)<br>Birth weight (g):<br><2500: $n = 29$ ; -0.82(-1.42, -0.23), $p = 0.007$<br>2500-3999: $n = 277$ (ref)<br>4000+: $n = 62$ ; -0.43 (-0.84, -0.03) $p = 0.04$                                                                                                                                                                                                                                                                                 | Maternal age at delivery, maternal ethnicity, maternal smoking prior to or during pregnancy, newborn sex, preterm birth                                                    |
| Nafee (2009), UK** [31]                    | 24(NR)                                             | Birth weight (birth)                                      | LINE-1 using pyrosequencing                                                                                                 | Cord blood | Birth                                               | LINE-1 methylation associated with BVP $p = 0.014$ , adjusted $R^2 = 0.211$                                                                                                                                                                                                                                                                                                                                                                                                        |                                                                                                                                                                            |
| Burris (2013), Mexico [32]                 | 219 (47.2)                                         | Birth weight (Birth, GAD 39-1 $\pm$ 1.1w)                 | ICR1 (4 CpGs), ICR2 (4 CpGs), H19 (2 CpGs), LINE-1 (4 CpGs), Alu (3 CpGs), NR3C1 (5 CpGs), GCR (1 CpG) using pyrosequencing | Cord blood | Birth (GAD39.1 $\pm$ 1.1w)                          | Mean birth weight (g) (difference (95% CI) with 1 SD increase in DNA methylation (average of each CpG site within each locus):<br>IGF2 regulatory complex<br>ICR1: 3(-50.56)<br>ICR2: -20(-72.32)<br>H19 promoter-4(-49.57)<br>Glucocorticoid receptor<br>GCR: 1(-53.52)<br>NR3C1: 39(-94.15)<br>Repetitive elements<br>LINE-1: 16(-38.70)<br>Alu: 8(-61.44)                                                                                                                       | GA, maternal age, second trimester maternal weight, parity, education, infant sex                                                                                          |
| Bouwland-Both (2013), The Netherlands [33] | Generation R, SGA, 69 (43) AGA (control): 471 (43) | Birth weight, (GA 40-3w)                                  | IGF2 DMR, H19 promoter, MTHFR using mass-spectrometry based method                                                          | Cord blood | Birth (GA 40-3w)                                    | Adjusted difference (95% CI) in % methylation for SGA vs. control:<br>IGF2 DMR: -1.07 (-1.93, -0.21), $p = 0.015$<br>H19: -0.27 (-0.94, 0.39), $p = 0.42$<br>MTHFR was found to be hypomethylated with limited variability between SGA and controls and no further analysis was conducted: median % methylation (99% range): 2.4 (1.5-3.8) vs. 2.5 (1.4-4.0)                                                                                                                       | Correlations between CpG sites, bisulphite batch, GA, maternal age, maternal education, parity, fetal sex, maternal BMI, folic acid, supplement use, smoking, preeclampsia |
| Qian (2016), China [34]                    | SGA, 39 (41.0) AGA, 39 (55.1)                      | Birth weight (birth)                                      | H19 (12 CpGs) & MEST (11 CpGs) using mass spectrometry-based method                                                         | Cord blood | Birth                                               | Higher methylation levels in H19 in SGA vs. AGA:<br>Site 7: 8, $p = 0.03$<br>Site 9: $p = 0.02$<br>Site 17: 18, $p = 0.05$<br>No significant difference at other sites                                                                                                                                                                                                                                                                                                             |                                                                                                                                                                            |
| Hoyo (2014), US [35]                       | NEST, 496 (49.7)                                   | Birth weight, (Birth, 85% GAD $>$ 37w)                    | DMRs in MEG3, NNAT, PEG10, SGC, MEG3-IG, PLAGL1, PEG3, PEG1, MEST, H19, IGF2 using pyrosequencing                           | Cord blood | Birth (85% GAD $>$ 37w)                             | $\beta$ (SE) for associations between DMR and birth weight (g), (Referents are infants with methylation levels in the fourth quartile:<br>MEG3: 10.92 (4.12), $p = 0.008$<br>NNAT: -7.57 (4.04), $p = 0.06$<br>PEG10/SGC: 18.11 (5.77), $p = 0.002$<br>MEG3-IG: 0.42 (0.13), $p = 0.96$<br>PLAGL1: 12.33 (3.78), $p = 0.001$<br>PEG3: 1.36 (8.97), $p = 0.88$<br>PEG1/MEST: -5.60 (5.68), $p = 0.33$<br>H19: 20.25 (6.76), $p = 0.003$<br>IGF2: 6.10 (5.71), $p = 0.29$            | Maternal race, sex, cigarette smoking, GAD, GA at blood draw, physical activity, pre-pregnancy BMI and delivery route                                                      |
| Hoyo (2012), US [36]                       | NEST, 300 (50.3)                                   | Birth weight, (Birth, 85% GAD $>$ 37w)                    | DMR in IGF2, H19 using pyrosequencing                                                                                       | Cord blood | Birth (85% GAD $>$ 37w)                             | IGF2<br>Birth weight $\leq$ 2500g vs. $>$ 2500g: 48.6(9.4) vs. 48.3(7.5), $p = 0.88$<br>H19<br>Birth weight $\leq$ 2500g vs. $>$ 2500g: 59.8(6.5) vs. 61.5 (6.0), $p = 0.19$                                                                                                                                                                                                                                                                                                       |                                                                                                                                                                            |

(Continued)



Table 1. (Continued)

| First author (year), country | Cohort, N (% female)                               | Early life variable (mean age $\pm$ SD (age range))      | DNA methylation                                                                                                                                                                                                 | Tissue     | Mean age at epigenetic measure $\pm$ SD (age range) | Main result                                                                                                                                                                                                                                                                                                                                                                                                                                                                                                                                                                                                                                                                                 | Confounders                                                                               |
|------------------------------|----------------------------------------------------|----------------------------------------------------------|-----------------------------------------------------------------------------------------------------------------------------------------------------------------------------------------------------------------|------------|-----------------------------------------------------|---------------------------------------------------------------------------------------------------------------------------------------------------------------------------------------------------------------------------------------------------------------------------------------------------------------------------------------------------------------------------------------------------------------------------------------------------------------------------------------------------------------------------------------------------------------------------------------------------------------------------------------------------------------------------------------------|-------------------------------------------------------------------------------------------|
| Liu (2012), UK [37]          | NEST, 508 (45)                                     | Birth weight (Birth, GAD $\geq 37$ w)                    | DMRs in <i>IGF2</i> , <i>PEG10</i> , <i>PLAGL1</i> using pyrosequencing                                                                                                                                         | Cord blood | Birth (GAD $>37$ w)                                 | % methylation difference in DMRs between NBW (2,500–4500g), LBW (<2,500g), & HBW (>4500g)<br><i>IGF2</i> DMR: 1.6% lower methylation among LBW vs. NBW $p = 0.06$ (female infants 2.3%, $p = 0.03$ , black mothers 2.0%, $p = 0.08$ )<br><i>PLAGL1</i> DMR: 5.9% higher methylation among HBW vs NBW, $p = 0.02$<br><i>PEG10</i> DMR: 3.4% higher methylation among HBW compared with NBW, $p = 0.06$                                                                                                                                                                                                                                                                                       |                                                                                           |
| Soubry (2011), US [38]       | NEST, 486 (47.5)                                   | Birth weight (Birth)                                     | <i>IGF2</i> DMR (3 CpGs) and <i>H19</i> DMR (4 CpGs) using pyrosequencing                                                                                                                                       | Cord blood | Birth                                               | Mean% (SD) <i>IGF2</i> methylation $n = 356$<br>< 2500g: 47.57 (8.24)<br>>2500g: 47.43 (6.67),<br>$\Delta(p) > 0.41$ (0.91)<br>Mean% (SD) <i>H19</i> methylation $n = 411$<br>< 2500g: 58.96 (5.32)<br>>2500g: 60.30 (7.58)<br>$\Delta(p) > 1.34$ (0.15)                                                                                                                                                                                                                                                                                                                                                                                                                                    |                                                                                           |
| Su (2016), China [39]        | 115 (NR)                                           | Birth weight (Birth, all full term)                      | <i>IGF2</i> DMR (5 CpGs) using mass-spectrometry based method                                                                                                                                                   | Cord blood | Birth, all full term                                | Linear mixed model of <i>IGF2</i> methylation on birth weight accounting for correlations between CpG sites, Coef( $p$ ):<br><i>CpG10</i> : 0.06 (0.65)<br><i>CpG2</i> : -0.20 (0.07)<br><i>CpG6</i> : -0.17 (0.22)<br><i>CpG10</i> : -0.22 (0.05), $p < 0.05$<br><i>CpG12</i> : -0.22 (0.04), $p < 0.05$<br><i>CpG13</i> : -0.09 (0.49)<br>Linear mixed model of <i>H19</i> methylation on birth weight accounting for correlations between CpG sites, Coef( $p$ ):<br><i>CpG4</i> : 0.04 (0.73)<br><i>CpG14</i> : -0.09 (0.41)<br><i>CpG14</i> : -16: 0.89 (0.03), $p < 0.05$<br><i>CpG19</i> : 20.0: 27 (0.07)<br><i>CpG23</i> : -0.23 (0.02), $p < 0.05$<br><i>CpG29</i> : -0.63 (0.09) |                                                                                           |
| Vidal (2013), US [40]        | NEST, 397 (51)                                     | Birth weight (Birth)                                     | <i>MEG3</i> & <i>PLAGL1</i> DMR, using pyrosequencing                                                                                                                                                           | Cord blood | Birth                                               | $\beta$ SE for DNA methylation at the <i>PLAGL1</i> & <i>MEG3</i> with a 10 g increase in birth weight:<br><i>MEG3</i> : -4.7 (5.85), $p = 0.42$<br><i>PLAGL1</i> : 10.47 (5.22), $p = 0.04$                                                                                                                                                                                                                                                                                                                                                                                                                                                                                                | Infant sex, race, maternal education, maternal smoking, folic acid intake, GA at delivery |
| Zhang (2015), China [41]     | SGA:60 (-40.7)<br>AGA:60 (-40.7)<br>LGA:30 (-40.7) | Birth weight (Birth)                                     | <i>H19</i> and <i>IGF2</i> DMR using pyrosequencing                                                                                                                                                             | Blood      | Birth                                               | The methylation level of <i>H19</i> DMR was significantly higher in the SGA ( $p = 0.04$ ) and LGA ( $p = 0.03$ ) compared to AGA group                                                                                                                                                                                                                                                                                                                                                                                                                                                                                                                                                     |                                                                                           |
| Ghosh (2015), US [42]        | LBW:57(NR) HBW:57 (NR)                             | Birth weight (Birth)                                     | 96 CpG sites in genes found previously to be related to birth weight, growth and metabolism [23] using Infinium Human Methylation27k BeadChip                                                                   | Cord blood | Birth                                               | LBW infants had greater number (mean = 14) of disrupted CpGs/outliers than HBW children (mean = 5) (fishers exact test, $p = 0.05$ )                                                                                                                                                                                                                                                                                                                                                                                                                                                                                                                                                        |                                                                                           |
| Azzi (2014), France [43]     | EDEN, 254 (NR)                                     | Birth weight, Birth length, (Birth, GAD 39.5 $\pm$ 1.5w) | <i>ZAC1</i> DMR methylation using allele-specific methylation multiplex real-time quantitative PCR                                                                                                              | Cord blood | Birth (GAD 39.5 $\pm$ 1.5w)                         | Spearman's rank partial correlation coefficients for early life variables and <i>ZAC1</i> DMR methylation index:<br>Birth weight $z$ -score: 0.08 $p = 0.23$<br>Birth length $z$ -score: 0.04 $p = 0.51$                                                                                                                                                                                                                                                                                                                                                                                                                                                                                    | Centre, child's sex, GA                                                                   |
| Burris (2015), Mexico [44]   | PROGRESS, 531 (45)                                 | Birth weight (GAD 38.8 $\pm$ 1.8w)                       | <i>AHRR</i> gene promoter (3 CpGs) using pyrosequencing                                                                                                                                                         | Cord blood | Birth (GAD 38.8 $\pm$ 1.8w)                         | Average difference (95%CI) in <i>AHRR</i> DNA %methylation, across 3 CpG sites, Bonferroni adjustment $p = 0.008$ :<br><i>Birth-weight-for-GA</i> (per SD): -0.97 (-1.26, -0.68), $p < 0.0001$                                                                                                                                                                                                                                                                                                                                                                                                                                                                                              | Maternal age, maternal BMI, maternal education, parity, smoke exposure, sex               |
| Haworth (2013), UK [45]      | 129 (55)                                           | Birth weight (Median GAD 39.4 (IQR:39.0–40.3w))          | Selection of sites based on [25]: <i>GSTM5</i> (2 CpGs), <i>HMOX2</i> (1 CpG), <i>ALOX12</i> (5 CpGs), <i>APOB</i> (7 CpGs), <i>AQPB</i> (1 CpG), <i>MET25</i> (1 CpG), <i>AMN</i> (1 CpG) using pyrosequencing | Cord blood | Birth (Median GAD 39.4 (IQR:39.0–40.3w))            | Association between methylation % and BWP, $p$<br><i>GSTM5</i> site 1: 0.18<br><i>GSTM5</i> site 2: 0.25<br><i>HMOX2</i> site 1: 0.65<br><i>ALOX12</i> site 1: 0.55<br><i>ALOX12</i> site 2: 0.81<br><i>ALOX12</i> site 3: 0.93<br><i>ALOX12</i> site 4: 0.11<br><i>ALOX12</i> site 5: 0.56<br><i>APOB</i> site 1: 0.88<br><i>APOB</i> site 2: 0.90                                                                                                                                                                                                                                                                                                                                         |                                                                                           |

(Continued)

Table 1. (Continued)

| First author (year), country                       | Cohort, N (% female)                                                | Early life variable (mean age $\pm$ SD (age range))                                                                                                        | DNA methylation                                            | Tissue     | Mean age at epigenetic measure $\pm$ SD (age range)                                                                                            | Main result                                                                                                                                                                                                                                                                                                                                                                                                                                                                                                                                                                                                                                                                                                                                                                                                                                                                                                                                                                                                                                                                                                                                                                                                                                                                                      | Confounders                                                                                                                                                             |
|----------------------------------------------------|---------------------------------------------------------------------|------------------------------------------------------------------------------------------------------------------------------------------------------------|------------------------------------------------------------|------------|------------------------------------------------------------------------------------------------------------------------------------------------|--------------------------------------------------------------------------------------------------------------------------------------------------------------------------------------------------------------------------------------------------------------------------------------------------------------------------------------------------------------------------------------------------------------------------------------------------------------------------------------------------------------------------------------------------------------------------------------------------------------------------------------------------------------------------------------------------------------------------------------------------------------------------------------------------------------------------------------------------------------------------------------------------------------------------------------------------------------------------------------------------------------------------------------------------------------------------------------------------------------------------------------------------------------------------------------------------------------------------------------------------------------------------------------------------|-------------------------------------------------------------------------------------------------------------------------------------------------------------------------|
| Mulligan (2012), Democratic Republic of Congo [46] | 25 (NR)                                                             | Birth weight (17% full term)                                                                                                                               | NR3C1 (39 CpGs) using PCR                                  | Cord blood |                                                                                                                                                | <p>APOB site 3: 0.99</p> <p>APOB site 4: 0.79</p> <p>APOB site 5: 0.48</p> <p>APOB site 6: 0.037, correlation <math>r = -0.185</math></p> <p>APOB site 7: 0.14</p> <p>AQP8 site 1: 0.71</p> <p>MALP2K3 site 1: 0.16</p> <p>AMY site 1: 0.66</p> <p>Associations between % methylation and proportion with low BWP (<math>\leq 50\%</math> vs. <math>&gt;50\%</math>) OR (95%CI)</p> <p>GSTM15: 0.33 (0.14–0.77), <math>p = 0.01</math></p> <p>MALP2K3: 0.24 (0.01–0.83), <math>p = 0.02</math></p> <p>APOB: 2.56 (1.14–5.76), <math>p = 0.02</math></p> <p>No significant associations for methylation in other genes (data not shown)</p>                                                                                                                                                                                                                                                                                                                                                                                                                                                                                                                                                                                                                                                       |                                                                                                                                                                         |
| Mulligan (2012), Democratic Republic of Congo [46] | 25 (NR)                                                             | Birth weight (17% full term)                                                                                                                               | NR3C1 (39 CpGs) using PCR                                  | Cord blood | Birth (17% full term)                                                                                                                          | <p>First PC of % methylation of 39 CpG sites explained 16.15% of variance &amp; correlated with birth weight <math>r = -0.45</math>, <math>p = 0.02</math></p>                                                                                                                                                                                                                                                                                                                                                                                                                                                                                                                                                                                                                                                                                                                                                                                                                                                                                                                                                                                                                                                                                                                                   |                                                                                                                                                                         |
| Pan (2015), Singapore [47]                         | GUSTO, 991 (41)                                                     | Birth weight, Birth length, Body composition (Birth, GAD 38.9 $\pm$ 1w)                                                                                    | HIF1A (3CpGs) using Infinium Human Methylation450 BeadChip | Cord blood | Birth (GAD 38.9 $\pm$ 1w)                                                                                                                      | <p>Association between methylation in cg27146090; cg16672562; cg22891070 and anthropometric outcomes. Coef. I.e. % change in outcome for 10% increase in methylation (95% CI); <math>p</math></p> <p>Birth weight (g):</p> <p>3.61 (0.68–6.63), <math>p = 0.015</math>;</p> <p>3.34 (1.4–5.3), <math>p = 0.0007</math>;</p> <p>2.05 (0.32–3.82), <math>p = 0.20</math></p> <p>Birth length (cm):</p> <p>0.60 (-0.29–1.5), <math>p = 0.19</math>;</p> <p>0.46 (-0.13–1.05), <math>p = 0.13</math>;</p> <p>0.35 (-0.18–0.88), <math>p = 0.20</math></p> <p>BMI at birth (g/cm<sup>2</sup>):</p> <p>2.38 (0.23–4.58), <math>p = 0.03</math>;</p> <p>2.40 (0.97–3.84), <math>p = 0.00096</math>;</p> <p>1.35 (0.07–2.64), <math>p = 0.039</math></p> <p>Subscapular skinfold (mm):</p> <p>-0.77 (-5.97–4.72), <math>p = 0.78</math>;</p> <p>5.44 (1.76–9.25), <math>p = 0.0035</math>;</p> <p>3.27 (0–6.64), <math>p = 0.050</math></p> <p>Triceps skinfold (mm):</p> <p>-1.28 (-6.42–4.14), <math>p = 0.64</math>;</p> <p>0.75 (-2.75–4.38), <math>p = 0.68</math>;</p> <p>0.25 (-2.90–3.51), <math>p = 0.88</math></p> <p>Subscapulariceps:</p> <p>0.50 (-3.85–5.04), <math>p = 0.83</math>;</p> <p>4.67 (1.66–7.77), <math>p = 0.0022</math>;</p> <p>3.02 (0.34–5.75), <math>p = 0.027</math></p> | Child sex, ethnicity, cell type proportions and interactions between ethnicity and cell type proportions                                                                |
| Lesieur (2013), US [48]                            | Rhode Island Child Health Study, 58 (-49)                           | Birth weight (Birth, GAD 39 $\pm$ 1.1w)                                                                                                                    | LFP promoter using pyrosequencing                          | Cord blood | Birth (GAD 39 $\pm$ 1.1w)                                                                                                                      | <p><math>\beta</math> coef (SE), <math>p</math> of LFP as dependent variable:</p> <p>AGA (reference) vs. LGA: 0.47 (0.53), <math>p = 0.31</math></p> <p>AGA (reference) vs. SGA: 1.78 (0.60), <math>p = 4.6 \times 10^{-3}</math></p>                                                                                                                                                                                                                                                                                                                                                                                                                                                                                                                                                                                                                                                                                                                                                                                                                                                                                                                                                                                                                                                            | Maternal blood LEP, pre-pregnancy BMI, race, tobacco use during pregnancy, hypertension during pregnancy, delivery method, maternal age, rs2167270 genotype, infant sex |
| <b>Childhood height/weight</b>                     |                                                                     |                                                                                                                                                            |                                                            |            |                                                                                                                                                |                                                                                                                                                                                                                                                                                                                                                                                                                                                                                                                                                                                                                                                                                                                                                                                                                                                                                                                                                                                                                                                                                                                                                                                                                                                                                                  |                                                                                                                                                                         |
| Almeri (2012), Greece [49]                         | Greek Healthy Growth Study, Normal weight: 24 (100) Obese: 23 (100) | Body size, (normal weight: 10.6 $\pm$ 0.5y & 10.5 $\pm$ 0.4y for FTO A/T respectively; Obese: (11.1 $\pm$ 0.9y & 10.7 $\pm$ 0.5y for FTO A/T respectively) | Infinium Human Methylation27 BeadChip                      | Blood      | Normal weight: 10.6 $\pm$ 0.5y & 10.5 $\pm$ 0.4y for FTO A/T respectively<br>Obese: 11.1 $\pm$ 0.9y & 10.7 $\pm$ 0.5y for FTO A/T respectively | <p>Differentially methylated genes between obese and normal weight children: Average methylation (beta), % methylation change in obese relative to average methylation, <math>p</math> adjusted for multiple comparisons (CpG site NR):</p> <p>CERCAM: 4.9, -13.7%, <math>p = 0.007</math></p> <p>DPYD: 2.8, -16.4%, <math>p = 0.008</math></p> <p>IL12A: 2.8, 15.5%, <math>p = 0.008</math></p> <p>ZNF35: 22.2, -5.5%, <math>p = 0.008</math></p> <p>ZNF362: 5.2, -8.3%, <math>p = 0.008</math></p>                                                                                                                                                                                                                                                                                                                                                                                                                                                                                                                                                                                                                                                                                                                                                                                             |                                                                                                                                                                         |

(Continued)

Table 1. (Continued)

| First author (year), country | Cohort, N (% female) | Early life variable (mean age $\pm$ SD (age range)) | DNA methylation             | Tissue | Mean age at epigenetic measure $\pm$ SD (age range) | Main result                                                                                                                                                                                                                                                                                                                                                                                                                                                                                                                                                                                                                                                                                                                                                                                                                                                                                                                                                                                                                                                                                                                                                                                                                                                                                                                                                                                                                                                                                                                                                                                                                                                                                                                                                                                                                                                                                                                                                                                                                                                                                                                                                                                                                                                                                                                                                                                                                                                                                                                                                                                                                                                                                                                                                                                                                                                                                                                                                                                                                                                                                                                                                                                                                                                                                                                                                                                                                                                                                                                                                                                                                                                                                                                                                                                                                                                                                                                                                                                                                                                                                                                                                                                                                                                                                                                                                                                                                                                                                                                                                                                                    | Confounders |
|------------------------------|----------------------|-----------------------------------------------------|-----------------------------|--------|-----------------------------------------------------|----------------------------------------------------------------------------------------------------------------------------------------------------------------------------------------------------------------------------------------------------------------------------------------------------------------------------------------------------------------------------------------------------------------------------------------------------------------------------------------------------------------------------------------------------------------------------------------------------------------------------------------------------------------------------------------------------------------------------------------------------------------------------------------------------------------------------------------------------------------------------------------------------------------------------------------------------------------------------------------------------------------------------------------------------------------------------------------------------------------------------------------------------------------------------------------------------------------------------------------------------------------------------------------------------------------------------------------------------------------------------------------------------------------------------------------------------------------------------------------------------------------------------------------------------------------------------------------------------------------------------------------------------------------------------------------------------------------------------------------------------------------------------------------------------------------------------------------------------------------------------------------------------------------------------------------------------------------------------------------------------------------------------------------------------------------------------------------------------------------------------------------------------------------------------------------------------------------------------------------------------------------------------------------------------------------------------------------------------------------------------------------------------------------------------------------------------------------------------------------------------------------------------------------------------------------------------------------------------------------------------------------------------------------------------------------------------------------------------------------------------------------------------------------------------------------------------------------------------------------------------------------------------------------------------------------------------------------------------------------------------------------------------------------------------------------------------------------------------------------------------------------------------------------------------------------------------------------------------------------------------------------------------------------------------------------------------------------------------------------------------------------------------------------------------------------------------------------------------------------------------------------------------------------------------------------------------------------------------------------------------------------------------------------------------------------------------------------------------------------------------------------------------------------------------------------------------------------------------------------------------------------------------------------------------------------------------------------------------------------------------------------------------------------------------------------------------------------------------------------------------------------------------------------------------------------------------------------------------------------------------------------------------------------------------------------------------------------------------------------------------------------------------------------------------------------------------------------------------------------------------------------------------------------------------------------------------------------------------------------|-------------|
| Perng (2012), Columbia [59]  | BSCC: 568 (53.7)     | Birth weight, Body size (5–12y)                     | LINE-1 using pyrosequencing | Blood  | (5–12y)                                             | <p>TSC2D2: 6.4, 7.4%, <math>p = 0.008</math><br/>                     CBX6: 3.1, -16.7%, <math>p = 0.008</math><br/>                     FOXF1: 4.7, -13.3%, <math>p = 0.008</math><br/>                     PSMID7: 7.5, -7.7%, <math>p = 0.012</math><br/>                     HLFK: 4.1, 10.2%, <math>p = 0.02</math><br/>                     PRRC3: 4.1, -8.4%, <math>p = 0.02</math><br/>                     MSI1: 2.8, -3.8%, <math>p = 0.02</math><br/>                     COL4A1: 9.9, 8.6%, <math>p = 0.02</math><br/>                     NBP3: 5.8, -8.4%, <math>p = 0.02</math><br/>                     USP5: 4.4, -10.4%, <math>p = 0.03</math><br/>                     PLOD2: 30.8, -5.4%, <math>p = 0.03</math><br/>                     TLES: 5.5, -6.9%, <math>p = 0.03</math><br/>                     RPS24: 5.8, -10.0%, <math>p = 0.04</math><br/>                     DVL3: 4.4, 8.5%, <math>p = 0.05</math><br/>                     POLD3: 6.1, -8.8%, <math>p = 0.05</math></p> <p>LINE-1 methylation mean (SD) &amp; birth weight (g).<br/>                     All <math>P_{trend} = 0.90</math>:<br/>                     &lt;2.500: <math>n = 44</math>, 80.71(0.77)<br/>                     2.500–2.999: <math>n = 110</math>, 80.28(0.67)<br/>                     3.000–3.499: <math>n = 128</math>, 80.26(0.66)<br/>                     &gt;3.500: <math>n = 147</math>, 80.22(0.62)<br/>                     Males <math>P_{trend} = 0.72</math>:<br/>                     &lt;2.500: <math>n = 20</math>, 80.20(0.61)<br/>                     2.500–2.999: <math>n = 41</math>, 80.49(0.73)<br/>                     3.000–3.499: <math>n = 57</math>, 80.41(0.57)<br/>                     &gt;3.500: <math>n = 73</math>, 80.30(0.64)<br/>                     Females <math>P_{trend} = 0.87</math>:<br/>                     &lt;2.500: <math>n = 24</math>, 80.14(0.90)<br/>                     2.500–2.999: <math>n = 69</math>, 80.16(0.60)<br/>                     3.000–3.499: <math>n = 71</math>, 80.14(0.70)<br/>                     &gt;3.500: <math>n = 74</math>, 80.13(0.59)</p> <p>LINE-1 methylation mean (SD) &amp; height-for-age z-score<br/>                     All <math>P_{trend} = 0.41</math>:<br/>                     &lt;-2.0: <math>n = 55</math>, 80.27(0.69)<br/>                     -2.0 &lt;-1.0: <math>n = 176</math>, 80.29(0.62)<br/>                     -1.0 &lt;-1.0: <math>n = 299</math>, 80.22(0.69)<br/> <math>\geq 1.0</math>: <math>n = 20</math>, 80.24(0.33)<br/>                     Males <math>P_{trend} = 0.75</math>:<br/>                     &lt;-2.0: <math>n = 22</math>, 80.27(0.64)<br/>                     -2.0 &lt;-1.0: <math>n = 90</math>, 80.40(0.57)<br/>                     -1.0 &lt;-1.0: <math>n = 133</math>, 80.37(0.70)<br/> <math>\geq 1.0</math>: <math>n = 6</math>, 80.34(0.31)<br/>                     Females <math>P_{trend} = 0.25</math>:<br/>                     &lt;-2.0: <math>n = 35</math>, 80.27(0.73)<br/>                     -2.0 &lt;-1.0: <math>n = 86</math>, 80.17(0.65)<br/>                     -1.0 &lt;-1.0: <math>n = 166</math>, 80.11(0.65)<br/> <math>\geq 1.0</math>: <math>n = 14</math>, 80.20(0.34)</p> <p>LINE-1 methylation mean (SD) &amp; BMI-for-age z-score<br/>                     All <math>P_{trend} = 0.79</math>:<br/>                     &lt;-2.0: <math>n = 10</math>, 80.41(0.51)<br/>                     -2.0 &lt;-1.0: <math>n = 63</math>, 80.34(0.68)<br/>                     -1.0 &lt;-1.0: <math>n = 371</math>, 80.22(0.64)<br/>                     1.0 &lt;-2.0: <math>n = 92</math>, 80.31(0.73)<br/> <math>\geq 2.0</math>: <math>n = 14</math>, 80.28(0.55)<br/>                     Males <math>P_{trend} = 0.90</math>:<br/>                     &lt;-2.0: <math>n = 5</math>, 80.39(0.65)<br/>                     -2.0 &lt;-1.0: <math>n = 30</math>, 80.36(0.64)<br/>                     -1.0 &lt;-1.0: <math>n = 160</math>, 80.36(0.64)<br/>                     1.0 &lt;-2.0: <math>n = 46</math>, 80.42(0.70)<br/> <math>\geq 2.0</math>: <math>n = 10</math>, 80.31(0.57)<br/>                     Females <math>P_{trend} = 0.42</math>:<br/>                     &lt;-2.0: <math>n = 5</math>, 80.43(0.43)<br/>                     -2.0 &lt;-1.0: <math>n = 33</math>, 80.32(0.72)<br/>                     -1.0 &lt;-1.0: <math>n = 211</math>, 80.11(0.62)<br/>                     1.0 &lt;-2.0: <math>n = 46</math>, 80.19(0.75)<br/> <math>\geq 2.0</math>: <math>n = 4</math>, 80.23(0.58)</p> |             |

(Continued)

Table 1. (Continued)

| First author (year), country     | Cohort, N (% female)                                    | Early life variable (mean age $\pm$ SD (age range)) | DNA methylation                                                                                                                                                                               | Tissue | Mean age at epigenetic measure $\pm$ SD (age range) | Main result                                                                                                                                                                                                                                                                                                                                                                                                                                                                                                                                                                                                                                                                                                                                                                                                                                                                                                                                                                                                                                                                                                                                                                                                                                                                                                                                                                                                                                                                                                                                                                                                                                                                                                                                                                                                                                                                                       | Confounders                                    |
|----------------------------------|---------------------------------------------------------|-----------------------------------------------------|-----------------------------------------------------------------------------------------------------------------------------------------------------------------------------------------------|--------|-----------------------------------------------------|---------------------------------------------------------------------------------------------------------------------------------------------------------------------------------------------------------------------------------------------------------------------------------------------------------------------------------------------------------------------------------------------------------------------------------------------------------------------------------------------------------------------------------------------------------------------------------------------------------------------------------------------------------------------------------------------------------------------------------------------------------------------------------------------------------------------------------------------------------------------------------------------------------------------------------------------------------------------------------------------------------------------------------------------------------------------------------------------------------------------------------------------------------------------------------------------------------------------------------------------------------------------------------------------------------------------------------------------------------------------------------------------------------------------------------------------------------------------------------------------------------------------------------------------------------------------------------------------------------------------------------------------------------------------------------------------------------------------------------------------------------------------------------------------------------------------------------------------------------------------------------------------------|------------------------------------------------|
| Omni (2016), NR [51]             | ISS: 94 (42)<br>Normal height (control): 119 (42)       | Height (ISS $\pm$ 3y vs. control 10 $\pm$ 3y)       | <i>IGF1</i> promoter P1 (9 CpGs) & P2 (7 CpGs) using pyrosequencing                                                                                                                           | Blood  | ISS: 9 $\pm$ 3y<br>Control: 10 $\pm$ 3y             | Mean methylation $\pm$ SD ISS children vs. controls, Bonferroni correction ( <i>p</i> non-significant = 1)<br><u><i>IGF1</i> P1 promoter</u><br>CG-1044: 88 $\pm$ 3 vs. 88 $\pm$ 3, <i>p</i> = 1<br>CG-960: 79 $\pm$ 2 vs. 79 $\pm$ 5, <i>p</i> = 1<br>CG-919: 90 $\pm$ 4 vs. 88 $\pm$ 6, <i>p</i> = 1<br>CG-631: 86 $\pm$ 2 vs. 86 $\pm$ 2, <i>p</i> = 1<br>CG-611: 93 $\pm$ 3 vs. 91 $\pm$ 3, <i>p</i> = 10 <sup>-4</sup><br>CG-491: 83 $\pm$ 4 vs. 83 $\pm$ 4, <i>p</i> = 1<br>CG-414: 12 $\pm$ 3 vs. 13 $\pm$ 5, <i>p</i> = 1<br>CG-308: 10 $\pm$ 4 vs. 10 $\pm$ 4, <i>p</i> = 1<br>CG-225: 8 $\pm$ 2 vs. 8 $\pm$ 2, <i>p</i> = 1<br><u><i>IGF1</i> P2 promoter</u><br>CG-232: 66 $\pm$ 7 vs. 63 $\pm$ 7, <i>p</i> = 0.005<br>CG-224: 74 $\pm$ 7 vs. 71 $\pm$ 7, <i>p</i> = 0.026<br>CG-218: 74 $\pm$ 7 vs. 70 $\pm$ 6, <i>p</i> = 0.008<br>CG-207: 45 $\pm$ 7 vs. 42 $\pm$ 7, <i>p</i> = 0.04<br>CG-137: 49 $\pm$ 4 vs. 46 $\pm$ 4, <i>p</i> = 9.8x10 <sup>-5</sup><br>CG-108: 61 $\pm$ 7 vs. 60 $\pm$ 6, <i>p</i> = 1<br>CG-77: 49 $\pm$ 6 vs. 47 $\pm$ 5, <i>p</i> = 1<br>CG-95: 17 $\pm$ 3 vs. 16 $\pm$ 3, <i>p</i> = 1                                                                                                                                                                                                                                                                                                                                                                                                                                                                                                                                                                                                                                                                                                                                                                   |                                                |
| Omni (2015), NR [52]             | Discovery cohort<br>110 (23)<br>Replication<br>106 (41) | Height (9.7y boys; 9.6 girls)                       | <i>IGF1</i> promoter P1 (9 CpGs) & P2 (7 CpGs) using pyrosequencing                                                                                                                           | Blood  | 9.7y boys; 9.6y girls                               | Correlation between % methylation and child height<br><u>Discovery cohort</u> (after Bonferroni correction), Replication cohort (after Bonferroni correction); Total R: Total R (after Bonferroni correction)<br><u><i>IGF1</i> Promoter 1</u><br>CG-1044: 0.02, <i>p</i> = 1; 0.02, <i>p</i> = 1; 0.03, <i>p</i> = 1<br>CG-960: 0.05, <i>p</i> = 1; 0.06, <i>p</i> = 1; 0.06, <i>p</i> = 1<br>CG-919: 0.02, <i>p</i> = 1; -0.13, <i>p</i> = 1; 0.04, <i>p</i> = 1<br>CG-631: -0.04, <i>p</i> = 1; -0.04, <i>p</i> = 1; -0.09, <i>p</i> = 1<br>CG-611: -0.25, <i>p</i> = 0.1; -0.48, <i>p</i> = 2.2x10 <sup>-3</sup> ; -0.39, <i>p</i> = 4.10 <sup>-7</sup><br>CG-491: -0.06, <i>p</i> = 1; -0.31, <i>p</i> = 0.03; -0.10, <i>p</i> = 1<br>CG-414: 0.00, <i>p</i> = 1; -0.19, <i>p</i> = 0.4; 0.09, <i>p</i> = 1<br>CG-308: 0.02, <i>p</i> = 1; 0.02, <i>p</i> = 1; 0.00, <i>p</i> = 1<br>CG-225: 0.08, <i>p</i> = 1; 0.012, <i>p</i> = 1; -0.10, <i>p</i> = 1<br><u><i>IGF1</i> P2 promoter</u><br>CG-232: -0.08, <i>p</i> = 1; -0.28, <i>p</i> = 0.03; -0.21, <i>p</i> = 0.01<br>CG-224: -0.32, <i>p</i> = 10 <sup>-3</sup> ; -0.17, <i>p</i> = 0.7; -0.24, <i>p</i> = 0.003<br>CG-218: -0.36, <i>p</i> = 10 <sup>-3</sup> ; -0.30, <i>p</i> = 0.02; -0.33, <i>p</i> = 1.2x10 <sup>-5</sup><br>CG-207: -0.35, <i>p</i> = 2.10 <sup>-3</sup> ; -0.12, <i>p</i> = 1; -0.24, <i>p</i> = 4.10 <sup>-3</sup><br>CG-137: -0.30, <i>p</i> = 10 <sup>-3</sup> ; -0.40, <i>p</i> = 1.9x10 <sup>-4</sup> ; -0.36, <i>p</i> = 4.10 <sup>-7</sup><br>CG-108: -0.25, <i>p</i> = 0.10; -0.19, <i>p</i> = 0.5; -0.23, <i>p</i> = 0.12<br>Average (from -1.08 to -2.32): -0.31, <i>p</i> = 0.007; -0.27, <i>p</i> = 0.004; -0.3<br><i>p</i> = 7.10 <sup>-5</sup><br>CG-77: -0.09, <i>p</i> = 1; -0.04, <i>p</i> = 1; -0.04, <i>p</i> = 1<br>CG-95: -0.08, <i>p</i> = 1; -0.03, <i>p</i> = 1; 0.07, <i>p</i> = 1 | Age, sex                                       |
| Hernandez-Valero (2013), US [53] | 75 (40)                                                 | Body size (8.2+1.5y)                                | <i>H19</i> DMR (CpG4, SNP rs10732516)                                                                                                                                                         | Blood  | 8.2 $\pm$ 1.5y                                      | Association of CpG4 methylation status of <i>H19</i> DMR (yes vs. no) with body size OR (95% CI):<br>Girls:<br>Overweight vs. lean: 0.39 (0.08, 2.02), <i>p</i> = 0.26<br>Boys:<br>Overweight vs. lean: 3.14 (0.77, 12.89), <i>p</i> = 0.11<br>Overall:<br>Overweight vs. lean: 1.27 (0.46, 3.54), <i>p</i> = 0.65                                                                                                                                                                                                                                                                                                                                                                                                                                                                                                                                                                                                                                                                                                                                                                                                                                                                                                                                                                                                                                                                                                                                                                                                                                                                                                                                                                                                                                                                                                                                                                                | Maternal BMI, residence (urban vs. rural), sex |
| Gardner (2015), US [54]          | 64 (59.37)                                              | Body size (5-6y)                                    | Promoter regions of <i>FTO</i> , <i>MAOA</i> , <i>SH2B1</i> , <i>LEPR</i> , <i>DNMT3B</i> , <i>BDNF</i> and <i>CCKAR</i> using methylation-sensitive restriction enzyme digestion and qRT-PCR | Saliva | (5-6y)                                              | Mean (SD) BMI percentile according to DNMT3B methylation (banded on percentile splits)<br>Lower tertile: 86.24 (17.87), <i>p</i> = 0.05<br>Upper tertile: 72.89 (23.78)<br>(data from other genes not presented)                                                                                                                                                                                                                                                                                                                                                                                                                                                                                                                                                                                                                                                                                                                                                                                                                                                                                                                                                                                                                                                                                                                                                                                                                                                                                                                                                                                                                                                                                                                                                                                                                                                                                  |                                                |

Body size at birth PROSPECTIVE

(Continued)

Table 1. (Continued)

| First author (year), country | Cohort, N (% female)                        | Early life variable (mean age $\pm$ SD (age range)) | DNA methylation                        | Tissue                     | Mean age at epigenetic measure $\pm$ SD (age range) | Main result                                                                                                                                                                                                                                                                                                                                                                                                                                                                                                                                                                                                                                                                                                                                                                                                                                                                                                                                                                                                                                                                                                                                                                                                                                                                                                                                                                                                                                                                                                                                                                                                                                                                                                                                                                                                                                                                                                                                                                                                                                                                                                                                                                                                                                                                                                                                                                                                                                                                                                                                                                                                                                                                                                                                                                                                                                                                                                                                                                                                                                                                                                              | Confounders                                                                                                                                                                                                         |
|------------------------------|---------------------------------------------|-----------------------------------------------------|----------------------------------------|----------------------------|-----------------------------------------------------|--------------------------------------------------------------------------------------------------------------------------------------------------------------------------------------------------------------------------------------------------------------------------------------------------------------------------------------------------------------------------------------------------------------------------------------------------------------------------------------------------------------------------------------------------------------------------------------------------------------------------------------------------------------------------------------------------------------------------------------------------------------------------------------------------------------------------------------------------------------------------------------------------------------------------------------------------------------------------------------------------------------------------------------------------------------------------------------------------------------------------------------------------------------------------------------------------------------------------------------------------------------------------------------------------------------------------------------------------------------------------------------------------------------------------------------------------------------------------------------------------------------------------------------------------------------------------------------------------------------------------------------------------------------------------------------------------------------------------------------------------------------------------------------------------------------------------------------------------------------------------------------------------------------------------------------------------------------------------------------------------------------------------------------------------------------------------------------------------------------------------------------------------------------------------------------------------------------------------------------------------------------------------------------------------------------------------------------------------------------------------------------------------------------------------------------------------------------------------------------------------------------------------------------------------------------------------------------------------------------------------------------------------------------------------------------------------------------------------------------------------------------------------------------------------------------------------------------------------------------------------------------------------------------------------------------------------------------------------------------------------------------------------------------------------------------------------------------------------------------------------|---------------------------------------------------------------------------------------------------------------------------------------------------------------------------------------------------------------------|
| Algha (2016), US [55]        | Project Viva, 476 (birth), 235 (7-10y) (48) | Birth weight, (Birth, all GAD >34w)                 | Infinium Human Methylation450 BeadChip | Cord blood & blood         | Birth & (7-10y)                                     | Adjusted difference (95% CI) in % cord blood methylation for 1 unit increase in birth weight for CA z-score. FDR $q < 0.05$ :<br>cg26663636(gene:NOS1AP): -0.39(-0.52, -0.25) $p = 4.31 \times 10^{-09}$<br>cg18181229(gene:PRX1): 1.86 (1.16, 2.56), $p = 1.80 \times 10^{-07}$<br>cg69750897(gene:PRX1): 1.93 (1.22, 2.64), $p = 1.83 \times 10^{-07}$<br>cg00222472(gene:PRX1): 1.78 (1.12, 2.45), $p = 2.03 \times 10^{-07}$<br>cg20682146(gene:PRX1): 1.54 (0.91, 2.17), $p = 1.60 \times 10^{-06}$<br>cg05780177(gene:DENN1B): 0.24 (0.14, 0.35), $p = 2.39 \times 10^{-06}$<br>cg00325458(gene:REL1): 0.10 (0.06, 0.14), $p = 7.27 \times 10^{-07}$<br>cg23483765(gene:NIPAL1): 0.22 (0.14, 0.31), $p = 1.15 \times 10^{-07}$<br>cg24453833(gene:NR4A1): 0.47 (0.27, 0.57), $p = 8.38 \times 10^{-08}$<br>cg24641186(gene:TFAP2B): 0.46 (0.27, 0.64), $p = 1.41 \times 10^{-06}$<br>cg09392842(gene:HLA-DMA2): -1.38(-2.24, -0.92) $p = 2.28 \times 10^{-06}$<br>cg09365990(gene:TFAM2): 0.72 (0.42, 1.03), $p = 3.66 \times 10^{-06}$<br>cg21809331(gene:RBM2B): 0.22 (0.13, 0.31), $p = 2.28 \times 10^{-06}$<br>cg14731462(gene:PTPRE): -0.92 (-1.29, -0.55), $p = 4.20 \times 10^{-07}$<br>cg25953130(gene:ARID5B): -2.01 (-2.48, -1.22), $p = 7.76 \times 10^{-07}$<br>cg23890469(gene:MMRN2): 0.57 (0.34, 0.81), $p = 1.55 \times 10^{-06}$<br>cg25124943(gene:)-: -0.92 (-1.31, -0.53), $p = 2.34 \times 10^{-06}$<br>cg11606444(gene:SORL1): 0.68 (0.39, 0.98), $p = 4.28 \times 10^{-06}$<br>cg01345517(gene:DERA): 0.15 (0.09, 0.21), $p = 1.55 \times 10^{-06}$<br>cg06648759(gene:)-: -1.08 (-1.52, -0.63), $p = 2.02 \times 10^{-06}$<br>cg14276580(gene:)-: -0.94 (-1.33, -0.54), $p = 2.24 \times 10^{-06}$<br>cg20494988(gene:GTF2A2): 0.21 (0.13, 0.29), $p = 3.20 \times 10^{-07}$<br>cg21842999(gene:SHF): 0.51 (0.3, 0.72), $p = 3.20 \times 10^{-06}$<br>cg09476997(gene:SLC9A3R2): 1.81 (1.06, 2.57), $p = 2.20 \times 10^{-06}$<br>cg27283514(gene:)-: 1.51 (0.86, 2.16), $p = 3.34 \times 10^{-08}$<br>cg19914654(gene:CD77): 0.73 (0.47, 0.98), $p = 2.2 \times 10^{-07}$<br>cg20186396(gene:CD77): 0.73 (0.45, 1.02), $p = 3.26 \times 10^{-07}$<br>cg14099906(gene:KDSR): 0.17 (0.1, 0.25), $p = 2.37 \times 10^{-06}$<br>cg23882285(gene:ROCK1): 0.12 (0.07, 0.17), $p = 3.37 \times 10^{-06}$<br>cg234026246(gene:SPTRN4): 0.13 (0.08, 0.19), $p = 2.23 \times 10^{-06}$<br>cg23877608(gene:CDC114): 0.17 (0.1, 0.24), $p = 2.35 \times 10^{-06}$<br>cg23344780(gene:EMP3): -0.58 (-0.83, -0.33), $p = 4.10 \times 10^{-06}$<br>cg04403921(gene:FM13): 0.13 (0.08, 0.19), $p = 1.68 \times 10^{-06}$<br>cg08423801(gene:TCBE2): 1.05 (0.69, 1.41), $p = 8.04 \times 10^{-09}$<br>Of these 34 CpG sites, difference (95% CI) in % peripheral blood methylation at 7-10 years for 1 unit increase in birth weight for CA z-score. At FDR $q$ value $< 0.05$ :<br>cg26663636(gene:NOS1AP): Similar magnitude to cord blood<br>cg18181229(gene:PRX1): Similar magnitude to cord blood<br>cg00222472(gene:PRX1): Similar magnitude to cord blood<br>cg20682146(gene:PRX1): 1.3 (0.5, 2.1) | Maternal age, race, education, smoking, parity, delivery mode, pre-pregnancy BMI, gestational diabetes, newborn sex, cord blood cell composition, childhood age and adult cell composition for prospective analyses |
| Broholm (2016), Denmark [56] | LBW: 13 (0)<br>Control: 13 (0)              | Birth weight (Birth)                                | Infinium Human Methylation450 BeadChip | Adipose derived stem cells | LBW: 22.4 $\pm$ 1.7y<br>Control: 23.2 $\pm$ 1.6y    | No significant difference in % methylation between LBW and control for individual CpG sites at FDR $q < 0.05$ .<br>Top 20 CpGs (gene sites):<br>cg14459772(gene:NA): $p = 3.85 \times 10^{-7}$<br>cg20170028(gene:SHANK2): $p = 1.35 \times 10^{-6}$<br>cg09528449(gene:TFEB): $p = 2.31 \times 10^{-6}$<br>cg13188409(gene:SNX14): $p = 3.65 \times 10^{-6}$<br>cg18830716(gene:SLC16A1): $p = 3.65 \times 10^{-6}$<br>cg20867124(gene:NCLN): $p = 3.65 \times 10^{-6}$<br>cg234032316(gene:AAAS): $p = 3.65 \times 10^{-6}$<br>cg26937590(gene:CARD11): $p = 3.65 \times 10^{-6}$<br>cg03726147(gene:DAP1): $p = 5.77 \times 10^{-6}$<br>cg10143883(gene:CEACAM19): $p = 5.77 \times 10^{-6}$<br>cg10503834(gene:EIF4A3): $p = 5.77 \times 10^{-6}$<br>cg1359886(gene:DNMT1): $p = 5.77 \times 10^{-6}$<br>cg01651651(gene:CSN3): $p = 8.65 \times 10^{-6}$<br>cg01956781(gene:FAM120B): $p = 8.65 \times 10^{-6}$<br>cg04594598(gene:NA): $p = 8.65 \times 10^{-6}$<br>cg05759166(gene:NA): $p = 8.65 \times 10^{-6}$<br>cg22641201(gene:BICG1): $p = 8.65 \times 10^{-6}$<br>cg22777162(gene:ACOX3): $p = 8.65 \times 10^{-6}$<br>cg03947203(gene:C2CD2L): $p = 1.29 \times 10^{-5}$<br>cg04632980(gene:TRIM1): $p = 1.29 \times 10^{-5}$                                                                                                                                                                                                                                                                                                                                                                                                                                                                                                                                                                                                                                                                                                                                                                                                                                                                                                                                                                                                                                                                                                                                                                                                                                                                                                                                                                                                                                                                                                                                                                                                                                                                                                                                                                                                                                                                            |                                                                                                                                                                                                                     |

(Continued)

Table 1. (Continued)

| First author (year), country      | Cohort, N (% female)                                           | Early life variable (mean age $\pm$ SD (age range)) | DNA methylation                                                                                             | Tissue             | Mean age at epigenetic measure $\pm$ SD (age range) | Main result                                                                                                                                                                                                                                                                                                                                                                                                                                                                                                                                                                                                                                                                                                                                                                                                                                                                                                                                                                                                                                                                                                                                                                                                                                                                                                                                                                                                                                                                                                                                                                                                                                                                                                                                                             | Confounders                                                                                   |
|-----------------------------------|----------------------------------------------------------------|-----------------------------------------------------|-------------------------------------------------------------------------------------------------------------|--------------------|-----------------------------------------------------|-------------------------------------------------------------------------------------------------------------------------------------------------------------------------------------------------------------------------------------------------------------------------------------------------------------------------------------------------------------------------------------------------------------------------------------------------------------------------------------------------------------------------------------------------------------------------------------------------------------------------------------------------------------------------------------------------------------------------------------------------------------------------------------------------------------------------------------------------------------------------------------------------------------------------------------------------------------------------------------------------------------------------------------------------------------------------------------------------------------------------------------------------------------------------------------------------------------------------------------------------------------------------------------------------------------------------------------------------------------------------------------------------------------------------------------------------------------------------------------------------------------------------------------------------------------------------------------------------------------------------------------------------------------------------------------------------------------------------------------------------------------------------|-----------------------------------------------------------------------------------------------|
| Simpkin (2015), UK [57]           | ARIES: 1,018 (51)<br>Replication:<br>WMHP, CANDIE & MoBa, (NR) | Birth weight, (Birth)                               | ARIES & MoBa: Infinium Human Methylation450 BeadChip<br>WMHP & CANDIE: Infinium Human Methylation27BeadChip | Cord blood & blood | Birth, 7.5y, 17.1y                                  | ARIES EWAS for birth weight, $p < 1.03 \times 10^{-7}$<br>Cord blood methylation: 23 probes in 14 genes (10 positive associations) <i>Blood at 7.5y</i> : No strong evidence for birth weight and methylation<br>Replication:<br>Probes (gene), $p$ with negative association between birth weight and methylation in ARIES and MoBa:<br>cg220076442(NA): 6.01x10 <sup>-9</sup><br>cg25953130(ARID5B): 8.23x10 <sup>-9</sup><br>Probes (gene), $p$ with negative association between birth weight and methylation in ARIES only:<br>cg04531636(BTD2): 8.01x10 <sup>-11</sup><br>cg14097568(NA): 1.06x10 <sup>-9</sup><br>cg17133774(CHD5): 2.17x10 <sup>-9</sup><br>cg0065448(NA): 4.83x10 <sup>-9</sup><br>cg00442282(GARA): 7.77x10 <sup>-9</sup><br>cg13896490(LOC201651): 8.87x10 <sup>-9</sup><br>cg12044213(CHCR1): 1.83x10 <sup>-8</sup><br>cg08817867(NA): 2.29x10 <sup>-8</sup><br>cg00382138(CF1): 2.50x10 <sup>-8</sup><br>cg06870470(DOCK6): 3.39x10 <sup>-8</sup><br>cg25557739(NA): 6.73x10 <sup>-8</sup><br>Probes (gene), $p$ with positive association between birth weight and methylation in ARIES only:<br>cg4434638(NHSL1): 2.62x10 <sup>-10</sup><br>cg15783940(NFIX): 1.33x10 <sup>-9</sup><br>cg14597739(LTA): 2.62x10 <sup>-9</sup><br>cg22964123(HOXA3): 3.12x10 <sup>-9</sup><br>cg05851442(HOXA3): 4.55x10 <sup>-9</sup><br>cg23387597(UTPR1): 1.15x10 <sup>-8</sup><br>cg24972755(MAEA): 1.75x10 <sup>-8</sup><br>cg16219283(LTA): 1.94x10 <sup>-8</sup><br>cg25799241(NA): 6.46x10 <sup>-8</sup><br>cg06658067(NA): 7.05x10 <sup>-8</sup><br>Longitudinal analysis at identified probes<br>Results suggest faster rates of change in methylation during childhood in children with low birth weight. No strong evidence for ages 7 to 17y | GA, parity, maternal age, maternal smoking, child sex, delivery method, cell type composition |
| Simpkin (2015), UK & Denmark [58] | ARIES<br>1018 (51)<br>GOYA<br>981 (NR)                         | Birth weight,<br>Body size (Birth & 7y)             | Infinium Human Methylation450 BeadChip to estimate Horvath epigenetic age                                   | Cord blood & blood | Birth, 7.5y, 17.1y                                  | ARIES<br><i>Correlations between early life variable and age acceleration:</i><br>Birth weight (kg) & AA at birth: $r = 0.01$ , $p = 0.73$<br>Birth weight (kg) & AA at 7 years: $r = 0.08$ , $p = 0.01$<br>Birth weight (kg) & AA at 17 years: $r = -0.07$ , $p = 0.04$<br><i>Longitudinal analysis of AA</i><br>Birthweight (kg) & average AA during childhood and adolescence:<br>$r = 0.0003$ (-0.001, 0.002), $p = 0.72$<br>Birthweight (kg) & changes with AA during childhood and adolescence: $r = -0.00004$ (-0.00017, 0.00009), $p = 0.58$<br>GOYA<br>Birth weight (kg) was positively associated with newborn AA in GOYA (0.04y per kg, 95% CI 0.02, 0.07; $p = 0.002$ )                                                                                                                                                                                                                                                                                                                                                                                                                                                                                                                                                                                                                                                                                                                                                                                                                                                                                                                                                                                                                                                                                     | Cell-type composition                                                                         |
| Rerkasem (2015), Thailand [59]    | 249 (NR)                                                       | Birth weight, birth length (Birth)                  | COBRA LINE-1 & Alu                                                                                          | Blood              | 20y                                                 | % Total Alu/LINE-1 methylation, absence vs. presence mean(SD), $p$<br>FDR:<br>SGA:<br>Alu: 33.32(7.67) vs. 33.91(7.72), $p = 0.14$<br>LINE-1: 79.24(6.23) vs. 80.21(5.96), $p = 0.45$<br>% UU methylation, mean(SD), $p$ FDR:<br>SGA:<br>Alu: 40.50(8.78) vs. 44.61(9.36), $p = 0.07$<br>LINE-1: 9.27(6.22) vs. 7.31(4.99), $p = 0.099$<br>% MM methylation, mean(SD), $p$ FDR:<br>SGA:<br>Alu: 13.14(11.0) vs. 12.44(8.31), $p = 0.70$<br>LINE-1: 48.95(13.14) vs. 49.53(12.42), $p = 0.77$<br>% UM methylation, mean(SD), $p$ FDR:<br>SGA:<br>Alu: 25.56(7.89) vs. 24.06(6.73), $p = 0.37$<br>LINE-1: 18.67(13.63) vs. 21.26(13.25), $p = 0.37$<br>% MU methylation, mean(SD), $p$ FDR:<br>SGA:<br>Alu: 20.80 (6.89) vs. 18.90(5.54) $p = 0.14$<br>LINE-1: 23.11(21.90) vs. 21.90(9.02), $p = 0.50$<br>Correlation $r$ ( $p$ ) between % methylation and birth weight                                                                                                                                                                                                                                                                                                                                                                                                                                                                                                                                                                                                                                                                                                                                                                                                                                                                                                 |                                                                                               |

(Continued)

Table 1. (Continued)

| First author (year), country                   | Cohort, N (% female)                                              | Early life variable (mean age ± SD (age range))                     | DNA methylation                                                                 | Tissue | Mean age at epigenetic measure ± SD (age range) | Main result                                                                                                                                                                                                                                                                                                                                                                                                                                                                                                                                                                                                                                                                                                                                                                                                                                                                                                                                                                                       | Confounders                                                                                                                                                    |
|------------------------------------------------|-------------------------------------------------------------------|---------------------------------------------------------------------|---------------------------------------------------------------------------------|--------|-------------------------------------------------|---------------------------------------------------------------------------------------------------------------------------------------------------------------------------------------------------------------------------------------------------------------------------------------------------------------------------------------------------------------------------------------------------------------------------------------------------------------------------------------------------------------------------------------------------------------------------------------------------------------------------------------------------------------------------------------------------------------------------------------------------------------------------------------------------------------------------------------------------------------------------------------------------------------------------------------------------------------------------------------------------|----------------------------------------------------------------------------------------------------------------------------------------------------------------|
| Terry (2008), US [60]                          | 85 (100)                                                          | Birth weight, Birth length (Birth)                                  | Global DNA methylation using [3H]-methyl acceptance assay                       | Blood  | (38–48y)                                        | Total Alu: -0.01(0.51)<br>Alu_LU0: 0.09(0.51)<br>Alu_MM: -0.09(0.51)<br>Alu_UM: 0.05(0.65)<br>Total LINE: -1.0(0.05)(0.65)<br>LINE-1_MM: 0.01(0.88)<br>LINE-1_LU: -0.10(0.51)<br>LINE-1_MU: -0.02(0.85)<br>LINE-1_UM: 0.04(0.65)<br><br>Unadjusted differences log DPM(μg/5% CI) for association between DNA methylation by variables (higher values indicated less DNA methylation)<br>Birth weight kg: -0.04 (-0.27, 0.18)<br>Birth length cm: -0.05 (-0.10, -0.002)<br>Multivariate linear regression, DPM(μg/5% CI) for association between DNA methylation by variables<br>Birth weight kg: 0.28 (-0.11, 0.67)<br>Birth length cm: -0.11 (-0.19, -0.03)                                                                                                                                                                                                                                                                                                                                      | Smoke exposure, adult BMI, SEP, parity                                                                                                                         |
| Drake (2012), UK [61]                          | The Mowbray Cohort, 34(64)                                        | Birth weight, Birth length, Ponderal index (Birth, GAD: 272.5±5.5d) | Promoter region of HSD2, exon 1(C) and 1(F) of GR/GF2 DMRs using pyrosequencing | Blood  | 40±0.12y                                        | Pearson correlation coefficients of mean methylation with birth weight<br>HSD2 Region 2: 0.49, $p < 0.05$ ; partial correlation 0.48, $p = 0.01$<br>HSD2 Region 2: 0.05, $p > 0.05$<br>H19 ICR: -0.02, $p > 0.05$<br>GR Exon 1F: 0.08, $p > 0.05$<br>GR Exon 1C: 0.13, $p > 0.05$<br>Pearson correlation coefficients of mean methylation with birth length<br>H19 ICR: -0.36, $p < 0.05$<br>Pearson correlation coefficients of mean methylation ponderal index<br>HSD2 Region 1: 0.23, $p > 0.05$<br>HSD2 Region 2: 0.26, $p > 0.05$                                                                                                                                                                                                                                                                                                                                                                                                                                                            | GAD, parity, sex, maternal antenatal BMI                                                                                                                       |
| Hernandez-Valero (2013), US [63]               | 75 (40)                                                           | Birth weight (Birth)                                                | H19 DMR (CpG4, SNP rs10732516)                                                  | Blood  | 8.2±1.5y                                        | Association of CpG4 methylation status of H19 DMR (yes vs. no) with body size OR (95% CI):<br>Girls:<br>Birth weight above vs. birth weight below median (7.1lbs): 0.07 (0.007, 0.74), $p = 0.03$<br>Boys:<br>Birth weight above vs. birth weight below median (7.1lbs): 0.58 (0.14, 3.34), $p = 0.44$<br>Overall:<br>Birth weight above vs. birth weight below median (7.1lbs): 0.32 (0.11, 0.94), $p = 0.04$                                                                                                                                                                                                                                                                                                                                                                                                                                                                                                                                                                                    | Maternal BMI, residence (urban vs. rural), sex                                                                                                                 |
| Stegers-Thraussen (2009), The Netherlands [62] | HAVEN study control 120 (-58)                                     | Birth weight (Birth, GAD: -39w)                                     | IGF2 DMR (5 CpGs) using mass-spectrometry based method                          | Blood  | 17m                                             | IGF2 DMR %SD of mean change in relative methylation<br>Birth weight: -1.7(0.8), $p = 0.03$                                                                                                                                                                                                                                                                                                                                                                                                                                                                                                                                                                                                                                                                                                                                                                                                                                                                                                        | Periconceptional folic acid use, GA                                                                                                                            |
| Wahlkampi (2013), Finland [65]                 | The Helsinki Study of VLBW Adults: VLWB:158(58) Controls:161 (60) | Birth weight                                                        | IGF2 (IGF2AS & IGF2BS) DMR using Sequenom EPI TYPER                             | Blood  | (18–27y)                                        | Mean (SD) methylation % at IGF2 VLBW (≤1,500g) vs. control<br>IGF2AS:<br>CpG3: 55.6(0.04) vs. 57.4(0.05)<br>CpG4: 60.4(0.07) vs. 60.9(0.06)<br>CpG67: 39.9(0.04) vs. 40.7(0.04)<br>CpG8: 51.8(0.05) vs. 52.8(0.04)<br>IGF2 BS:<br>CpG12: 68.5(0.05) vs. 68.4(0.05)<br>CpG34: 67.4(0.05) vs. 67.1(0.05)<br>CpG6: 50.6(0.04) vs. 50.7(0.04)<br>CpG7: 56.3(0.05) vs. 56.4(0.04)<br>CpG8: 55.4(0.04) vs. 55.3(0.04)<br>CpG91011: 53.1(0.05) vs. 52.7(0.05)<br>Differences (95% CI) in methylation between VLBW vs. controls<br>IGF2AS:<br>CpG3: -0.017(-0.028, -0.005), $p = 0.004$<br>CpG4: -0.010(-0.026, 0.007), $p = 0.25$<br>CpG67: -0.008(-0.017, 0.0001), $p = 0.10$<br>CpG8: -0.008(-0.020, 0.004), $p = 0.18$<br>IGF2 BS:<br>CpG12: 0.004(-0.008, 0.017), $p = 0.51$<br>CpG34: 0.005(-0.008, 0.018), $p = 0.44$<br>CpG6: -0.002(-0.012, 0.009), $p = 0.78$<br>CpG7: 0.001(-0.011, 0.012), $p = 0.93$<br>CpG8: 0.003(-0.008, 0.013), $p = 0.61$<br>CpG91011: 0.008(-0.004, 0.021), $p = 0.17$ | Plate, sex, age, height, BMI, mother's smoking during pregnancy, mother's age, father's age, mother's BMI before pregnancy, highest education of either parent |

(Continued)



Table 1. (Continued)

| First author (year), country                | Cohort, N (% female)                   | Early life variable (mean age $\pm$ SD (age range)) | DNA methylation                                                              | Tissue              | Mean age at epigenetic measure $\pm$ SD (age range) | Main result                                                                                                                                                                                                                                                                                                                                                                                                                                                                                                                                                                                                                                                                                                                                                                                                                                                                                                                | Confounders                                                                                                                                                                                                               |
|---------------------------------------------|----------------------------------------|-----------------------------------------------------|------------------------------------------------------------------------------|---------------------|-----------------------------------------------------|----------------------------------------------------------------------------------------------------------------------------------------------------------------------------------------------------------------------------------------------------------------------------------------------------------------------------------------------------------------------------------------------------------------------------------------------------------------------------------------------------------------------------------------------------------------------------------------------------------------------------------------------------------------------------------------------------------------------------------------------------------------------------------------------------------------------------------------------------------------------------------------------------------------------------|---------------------------------------------------------------------------------------------------------------------------------------------------------------------------------------------------------------------------|
| Obermann-Borst (2013), the Netherlands [64] | 120 (42)                               | Birth weight (Birth)                                | LIP using mass spectrometry based method                                     | Blood               | 17 $\pm$ 2.5m                                       | % Absolute methylation change (SE); % relative methylation change (SE) from linear mixed model<br><i>Model 1—each variable in model separately</i><br>Birth weight (SD): -1.2 (0.4); -5.0 (1.7), $p = 0.005$<br>Growth rate (SD): 0.0 (0.4); 0.0 (0.3), $p = 0.99$<br><i>Model 2—adjusted for all variables <math>p &lt; 0.1</math> in Model 1</i><br>Birth weight: 0.6 (0.3); -2.5 (2.1), $p = 0.16$                                                                                                                                                                                                                                                                                                                                                                                                                                                                                                                      | Model 1 Correlation between individual CpG dinucleotides, bisulfite batch, GA<br>Model 2 Correlation between individual CpG dinucleotides, bisulfite batch, GA, education, smoking, breastfeeding, sex, serum leptin, BMI |
| Tao (2013), US [65]                         | 639 (100) breast cancer cases          | Birth weight (Birth)                                | <i>E-cadherin</i> , <i>p16</i> and <i>RAR<math>\beta</math>2</i> , using PCR | Breast tumor tissue | 57.5 $\pm$ 11.3y                                    | <i>E-cadherin</i><br><i>Primenopausal group:</i><br>Birth weight $\leq$ 2.5kg: 2.79 (1.15, 6.82)<br>2.6–3.9kg: ref<br>> 3.9kg: 1.69 (0.70, 4.05)<br><i>Postmenopausal group:</i><br>Birth weight $\leq$ 2.5kg: 0.77 (0.38, 1.54)<br>2.6–3.9kg: ref<br>> 3.9kg: 0.86 (0.42, 1.73)<br><i>p16</i><br><i>Primenopausal group:</i><br>Birth weight $\leq$ 2.5kg: 0.70 (0.27, 1.85)<br>2.6–3.9kg: ref<br>> 3.9kg: 0.79 (0.33, 1.88)<br><i>Postmenopausal group:</i><br>Birth weight $\leq$ 2.5kg: 0.66 (0.34, 1.26)<br>2.6–3.9kg: ref<br>> 3.9kg: 0.68 (0.35, 1.34)<br><i>RAR<math>\beta</math>2</i><br><i>Primenopausal group:</i><br>Birth weight $\leq$ 2.5kg: 1.00 (0.39, 2.57)<br>2.6–3.9kg: ref<br>> 3.9kg: 1.61 (0.72, 3.60)<br><i>Postmenopausal group:</i><br>Birth weight $\leq$ 2.5kg: 1.03 (0.57, 1.85)<br>2.6–3.9kg: ref<br>> 3.9kg: 1.20 (0.65, 2.22)                                                              | Age, education, race, oestrogen receptor status                                                                                                                                                                           |
| Rangel (2014), Brazil [66]                  | 115 (47)                               | Birth weight (Birth)                                | ACE (3 CpGs) using pyrosequencing                                            | Blood               | (6–12y)                                             | Methylation levels (% average over 3 CpGs):<br>LBW ( $\leq$ 2.5kg): 5.4 $\pm$ 0.28%<br>NBW ( $>$ 3kg): 6.8 $\pm$ 0.19%<br>LBW children had lower methylation at CpG1 ( $p = 0.001$ ) and CpG3 ( $p = 0.009$ ). No significant difference at CpG2 ( $p = 0.14$ )<br>Adjusted model, $p < 0.001$<br>LBW ( $\leq$ 2.5kg): 5.1 (4.7, 5.8)<br>NBW ( $>$ 3kg): 6.8 (6.4, 7.2)                                                                                                                                                                                                                                                                                                                                                                                                                                                                                                                                                    | Premature status, sex, age, BMI, family history of CVD                                                                                                                                                                    |
| <b>Childhood body size and growth</b>       |                                        |                                                     |                                                                              |                     |                                                     |                                                                                                                                                                                                                                                                                                                                                                                                                                                                                                                                                                                                                                                                                                                                                                                                                                                                                                                            |                                                                                                                                                                                                                           |
| Simpkin (2015), UK & Denmark [58]           | AIBES<br>1018 (51)<br>GOYA<br>981 (NR) | Birth weight, body size (Birth & 7y)                | Infinium Human Methylation450 BeadChip to estimate Horvath epigenetic age    | Cord blood & blood  | Birth, 7.5y, 17.1y                                  | ARIES<br>Correlations between early life variable and age acceleration:<br>Height at 7y & AA 7 years: $r = 0.06$ , $p = 0.06$<br>Height at 7y & AA at 17 years: $r = 0.06$ , $p = 0.07$<br>BMI at 7y & AA 7 years: $r = -0.037$ , $p = 0.25$<br>BMI at 7y & AA at 17 years: $r = 0.005$ , $p = 0.88$                                                                                                                                                                                                                                                                                                                                                                                                                                                                                                                                                                                                                       | Cell-type composition                                                                                                                                                                                                     |
| Rerkasetam (2015), Thailand [59]            | 249 (NR)                               | Growth (birth, 3, 6, 9, 12 months)                  | COBRA LINE-1 & Alu                                                           | Blood               | 20y                                                 | % Total Alu/LINE-1 methylation, absence vs. presence mean (SD), $p$ FDR<br><i>Catch up growth:</i><br>Alu: 33.66 (6.99) vs. 39.61 (7.22), $p < 0.00001$<br>LINE-1: 79.87 (5.52) vs. 79.74 (6.95), $p = 0.94$<br>% LU methylation, mean (SD), $p$ FDR<br><i>Catch up growth:</i><br>Alu: 44.85 (8.76) vs. 37.39 (8.71), $p < 0.00001$<br>LINE-1: 7.86 (5.40) vs. 8.35 (6.21), $p = 0.78$<br>% MM methylation, mean (SD), $p$ FDR<br><i>Catch up growth:</i><br>Alu: 12.1 (9.07) vs. 16.60 (8.58), $p = 0.233$<br>LINE-1: 49.09 (12.20) vs. 50.49 (15.26), $p = 0.78$<br>% UM methylation, mean (SD), $p$ FDR<br><i>Catch up growth:</i><br>Alu: 23.75 (6.95) vs. 26.04 (7.11), $p = 0.19$<br>LINE-1: 20.78 (14.19) vs. 20.98 (15.46), $p = 0.94$<br>% MU methylation, mean (SD), $p$ FDR<br><i>Catch up growth:</i><br>Alu: 19.23 (6.06) vs. 19.97 (6.55), $p = 0.78$<br>LINE-1: 22.28 (9.35) vs. 20.19 (10.10), $p = 0.45$ |                                                                                                                                                                                                                           |

(Continued)

Table 1. (Continued)

| First author (year), country | Cohort, N (% female)                                                                                                                              | Early life variable (mean age $\pm$ SD (age range))                                                                                   | DNA methylation                        | Tissue                             | Mean age at epigenetic measure $\pm$ SD (age range)                                                                        | Main result                                                                                                                                                                                                                                                                                                                                                                                                                                                                                                                                                                                                                                                                                                                                                   | Confounders                                                                                                                          |
|------------------------------|---------------------------------------------------------------------------------------------------------------------------------------------------|---------------------------------------------------------------------------------------------------------------------------------------|----------------------------------------|------------------------------------|----------------------------------------------------------------------------------------------------------------------------|---------------------------------------------------------------------------------------------------------------------------------------------------------------------------------------------------------------------------------------------------------------------------------------------------------------------------------------------------------------------------------------------------------------------------------------------------------------------------------------------------------------------------------------------------------------------------------------------------------------------------------------------------------------------------------------------------------------------------------------------------------------|--------------------------------------------------------------------------------------------------------------------------------------|
| Groom (2012), UK [67]        | Cohort 1: Newcastle Preterm Birth Growth Study;<br>Cohort 2: ALSPAC (see results for n's)                                                         | Postnatal growth: (cohort 1: 10–16 wk; cohort 2: birth–8 weeks)<br>Fat mass: (cohort 1: median 12y; IQR: 3, cohort 2: 10y; IQR = 0.3) | TACSTD2 (7 CpGs) using pyrosequencing  | Cord blood, blood                  | Cohort 1: median 12y; IQR: 3<br>Cohort 2: birth & 7y                                                                       | Postnatal growth and TACSTD2 methylation<br>Mean methylation %: Slow growers vs. rapid growers, Spearman rank correlation, $r$<br>Cohort 1 $n = 94$ ; 73.05 (53.15–76.79) vs. 76.18 (57.04–78.99), 0.23, $p = 0.027$<br>Cohort 2 (methylation at 7y) $n = 161$ ; 68.45 (53.95–73.55), 0.10, $p = 0.29$<br>Childhood fat mass and TACSTD2 methylation<br>Spearman rank correlation, $r$<br>Cohort 1 (median age for fat mass 12, IQR = 3), $n = 91$ ; -0.22, $p = 0.037$<br>Cohort 2 (median age for fat mass 10y; IQR = 0.3):<br>Cord blood methylation, $n = 131$ ; 0.20, $p = 0.04$<br>Methylation at 7y, $n = 144$ ; 0.17, $p = 0.068$                                                                                                                     | Age, sex, batch effects                                                                                                              |
| <b>TWIN STUDIES</b>          |                                                                                                                                                   |                                                                                                                                       |                                        |                                    |                                                                                                                            |                                                                                                                                                                                                                                                                                                                                                                                                                                                                                                                                                                                                                                                                                                                                                               |                                                                                                                                      |
| Chen (2016), Denmark [68]    | DTR, 150 MZ twin pairs (48)                                                                                                                       | Birth weight (Birth)                                                                                                                  | Infinium Human Methylation450 BeadChip | Blood                              | Median 57y (30–74)                                                                                                         | No genome-wide significant DMR at FDR < 0.2 for qualitative discordance (large or small).<br>One DMR for Abw% with FDR = 0.128 covers 11 CpGs on chromosome 1 (hg19 chr1:75,198,211–75,199,117) where two genes, CRZ1 and TYW3 are located<br>cg17719053<br>cg10128416<br>cg19068652<br>cg09502221<br>cg07399417<br>cg26855724<br>cg02709834<br>cg26690034<br>cg26752657<br>cg21535942<br>cg00121533                                                                                                                                                                                                                                                                                                                                                          |                                                                                                                                      |
| Tan (2014), Denmark [69]     | DTR, 150 MZ twin pairs (28 pairs extremely discordant) (48)                                                                                       | Birth weight (Birth)                                                                                                                  | Infinium Human Methylation450 BeadChip | Blood                              | median 57y (30–74)                                                                                                         | No genome-wide significant CpG associated with qualitative (large or small) or quantitative (Abw%) birth weight discordance at FDR < 0.05.<br>Age-dependent intra-pair differential methylation in extremely discordant twins (Abw% > 25% at 5% FDR:<br>cg26855728 (gene:NA) 0.003, $p = 3.42 \times 10^{-6}$<br>cg15122603 (gene:NA) 0.002, $p = 1.25 \times 10^{-7}$<br>cg16636641 (gene:ZC7C2) 0.018, $p = 2.05 \times 10^{-7}$                                                                                                                                                                                                                                                                                                                            | WBC count estimates, age, sex, batch effects                                                                                         |
| Tsai (2015), UK [70]         | Twin4UK (discovery): 71 MZ pairs (100);<br>DTR old (replication): 27 (48.1)<br>DTR young (replication): 29 (51.7)<br>NTR (replication): 89 (74.2) | Birth weight (Birth)                                                                                                                  | Infinium Human Methylation450 BeadChip | Blood                              | Twin4UK 55.4<br>$\pm 9.8$ y<br>DTR (old): 64.1<br>$\pm 4.7$ y<br>DTR (young): 33.8<br>$\pm 1.6$ y<br>NTR: 34.2 $\pm$ 12.1y | Spearman's rank correlation coefficient (95% CI)<br>Discovery at 5% FDR<br>cg12562232 (gene:IGFBP3): 0.603, (0.430, 0.719), $p = 2.62 \times 10^{-6}$<br>Replication:<br>DTR old: 0.263, (-0.130, 0.585), $p = 0.186$<br>DTR young: -0.027, (-0.390, 0.343), $p = 0.888$<br>NTR: 0.161, (-0.049, 0.357), $p = 0.133$<br>Meta-analysis:<br>All twins: 0.282, (-0.037, 0.550), $p = 0.041$<br>Old twins: 0.474, (0.099, 0.731), $p = 0.008$ .<br>Next top-ranked signals in discovery (FDR = 0.57):<br>cg12049921 (gene:FAM148B): -0.519, $p = 3.49 \times 10^{-6}$<br>cg12508856 (gene:KPI3B): -0.510, $p = 3.52 \times 10^{-6}$<br>cg12391576 (gene:HLA-DPA1): 0.508, $p = 6.07 \times 10^{-6}$<br>cg16313699 (gene:ORIG1): -0.307, $p = 6.29 \times 10^{-5}$ | Sex, age, cell type composition, smoking status, alcohol consumption, methylation plate, position on the plate, family, and zygosity |
| Casey (2017), Canada [71]    | Quebec Newborn Twin Study; 52 pairs of MZ twins (58)                                                                                              | Birth weight (Birth)                                                                                                                  | Infinium Human Methylation450 BeadChip | Saliva                             | 15.7 $\pm$ 0.3y (15.3–16.7)                                                                                                | No one gene locus was significantly differentially methylated in birth weight discordant MZ twin pairs after correcting for multiple testing.<br>CpGs (gene) below $p < 0.0004$<br>cg06313433 (gene:FLNG), $p = 2.38 \times 10^{-6}$<br>cg11967457 (gene:LEFTY2), $p = 2.89 \times 10^{-5}$<br>cg18755581 (gene:TAIDN3), $p = 8.95 \times 10^{-5}$<br>cg09608383 (gene:FAM189A1), $p = 9.89 \times 10^{-5}$<br>cg18790856 (gene:NA), $p = 1.14 \times 10^{-5}$<br>cg17316316 (gene:NA), $p = 1.27 \times 10^{-5}$                                                                                                                                                                                                                                             | Cell type composition, sex, family                                                                                                   |
| Baird (2011), NR** [72]      | 10 MZ twin pairs                                                                                                                                  | Birth weight (Birth)                                                                                                                  | Infinium Human Methylation27 BeadChip  | Peripheral blood mononuclear cells | Adult (NR)                                                                                                                 | No one gene locus was significantly differentially methylated in all birth weight discordant MZ twin pairs. 21 loci were statistically significant differentially methylated in at least 4 of the 10 twin pairs, including INSR                                                                                                                                                                                                                                                                                                                                                                                                                                                                                                                               |                                                                                                                                      |

(Continued)

Table 1. (Continued)

| First author (year), country        | Cohort, N (% female)            | Early life variable (mean age $\pm$ SD (age range)) | DNA methylation                                                                                            | Tissue                                         | Mean age at epigenetic measure $\pm$ SD (age range) | Main result                                                                                                                                                                                                                                                                                                                                                                                                                                                                                                                                                                                                                                                                                                                                                                                                                                                                                                                                                                                                                                                                                                                                                                                                                                                                                                                                                                                                                                                                                                                                                                                                                                                                                                                                                                                                                                                                                                                                                                                                                                                                                                                                                                                                                                                                                                                                                                                                                                                                                                                                                                                                                                                                                                                                                                                                                                                                                                                                                                                                                                                                                                                                                                                                                                                                                                                                                                                                                                                           | Confounders          |
|-------------------------------------|---------------------------------|-----------------------------------------------------|------------------------------------------------------------------------------------------------------------|------------------------------------------------|-----------------------------------------------------|-----------------------------------------------------------------------------------------------------------------------------------------------------------------------------------------------------------------------------------------------------------------------------------------------------------------------------------------------------------------------------------------------------------------------------------------------------------------------------------------------------------------------------------------------------------------------------------------------------------------------------------------------------------------------------------------------------------------------------------------------------------------------------------------------------------------------------------------------------------------------------------------------------------------------------------------------------------------------------------------------------------------------------------------------------------------------------------------------------------------------------------------------------------------------------------------------------------------------------------------------------------------------------------------------------------------------------------------------------------------------------------------------------------------------------------------------------------------------------------------------------------------------------------------------------------------------------------------------------------------------------------------------------------------------------------------------------------------------------------------------------------------------------------------------------------------------------------------------------------------------------------------------------------------------------------------------------------------------------------------------------------------------------------------------------------------------------------------------------------------------------------------------------------------------------------------------------------------------------------------------------------------------------------------------------------------------------------------------------------------------------------------------------------------------------------------------------------------------------------------------------------------------------------------------------------------------------------------------------------------------------------------------------------------------------------------------------------------------------------------------------------------------------------------------------------------------------------------------------------------------------------------------------------------------------------------------------------------------------------------------------------------------------------------------------------------------------------------------------------------------------------------------------------------------------------------------------------------------------------------------------------------------------------------------------------------------------------------------------------------------------------------------------------------------------------------------------------------------|----------------------|
| Gordon (2012), Australia [73]       | 22 MZ and 12 DZ twin pairs (50) | Birth weight, (GAAD 36.2 $\pm$ 1.8wk (32–38))       | Infinium Human Methylation27 BeadChip                                                                      | Cord blood, umbilical vascular cells, placenta | GAAD 36.2 $\pm$ 1.8wk (32–38)                       | Genes: linear models with twin-pair as a factor and birth weight as covariate: CpGs (gene), B, adjusted <i>p</i> (FDR <i>p</i> <0.1)<br>Cord Blood MZ:<br>cg23366752 (gene:DNAAF4): 0.73, <i>p</i> = 0.27<br>cg6136776 (gene:KLF7): -0.15, <i>p</i> = 0.49<br>cg22290566 (gene:MAN1L): -0.23, <i>p</i> = 0.49<br>cg02921257 (gene:CMAT1): -0.27, <i>p</i> = 0.49<br>cg02989940 (gene:ERAF): -0.54, <i>p</i> = 0.49<br>cg11653858 (gene:SLC13A2): -0.75, <i>p</i> = 0.49<br>cg01564343 (gene:TREML1): -0.76, <i>p</i> = 0.49<br>cg11692021 (gene:GNB3): -0.89, <i>p</i> = 0.49; cg03569412 (gene:MBD3): -0.89, <i>p</i> = 0.49<br>cg16204289 (gene:HLI13391): -0.913, <i>p</i> = 0.49<br>Cord Blood DZ:<br>cg13750354 (gene:OC1AD1): 4.78, <i>p</i> = 0.009<br>cg07469792 (gene:KASFB): 4.13, <i>p</i> = 0.014<br>cg23807559 (gene:COG1): 3.73, <i>p</i> = 0.018<br>cg20166532 (gene:EDG1): 2.97, <i>p</i> = 0.038<br>cg13501117 (gene:WDR8): 2.92, <i>p</i> = 0.038<br>cg16192916 (gene:PSME4): 2.44, <i>p</i> = 0.062<br>cg09419670 (gene:PSMD5): 2.01, <i>p</i> = 0.097<br>cg00400263 (gene:C20orf177): 1.87, <i>p</i> = 0.10<br>cg24329794 (gene:GRSF1): 1.61, <i>p</i> = 0.13<br>cg10488141 (gene:SUFU): 1.50, <i>p</i> = 0.13<br>Umbilical cells MZ:<br>cg02813863 (gene:POLD1): -4.07, <i>p</i> = 0.07<br>cg26196700 (gene:SORD): -4.19, <i>p</i> = 0.999<br>cg11546621 (gene:PTGDS): -4.20, <i>p</i> = 0.999<br>cg26244225 (gene:APOLD1): -4.23, <i>p</i> = 0.999<br>cg01366419 (gene:WBSCR17): -4.23, <i>p</i> = 0.999<br>cg10673984 (gene:PPM1D): -4.25, <i>p</i> = 0.999<br>cg03962522 (gene:SLC5A1): -4.25, <i>p</i> = 0.999<br>cg00303548 (gene:H6S73): -4.25, <i>p</i> = 0.999<br>cg12888961 (gene:ACT2D): -4.27, <i>p</i> = 0.999<br>cg08832227 (gene:KCNJ1): -4.27, <i>p</i> = 0.999<br>Umbilical cells DZ:<br>cg00766729 (gene:LOC147808): 1.57, <i>p</i> = 0.14<br>cg01962826 (gene:GRAM4): 1.31, <i>p</i> = 0.14<br>cg18320336 (gene:STAFP): 1.20, <i>p</i> = 0.14<br>cg04007936 (gene:CARHSP1): 1.07, <i>p</i> = 0.14<br>cg22238923 (gene:DOK1): 1.004, <i>p</i> = 0.14<br>cg20909866 (gene:OVOL1): 0.996, <i>p</i> = 0.14<br>cg02196730 (gene:MTFHS1): 0.51, <i>p</i> = 0.28<br>cg20803370 (gene:PROX1): 0.28, <i>p</i> = 0.37<br>cg15437432 (gene:TMED9): 0.14, <i>p</i> = 0.41<br>cg08252620 (gene:KCTD15): 0.03, <i>p</i> = 0.44<br>Placenta MZ<br>cg17554194 (gene:HLA-B): -3.48, <i>p</i> = 0.34<br>cg2506052 (gene:SCD1): -3.55, <i>p</i> = 0.56<br>cg15860642 (gene:CBXN1): -3.57, <i>p</i> = 0.57<br>cg14614211 (gene:RXRL1): -3.59, <i>p</i> = 0.57<br>cg23337754 (gene:CRABP1): -3.62, <i>p</i> = 0.68<br>cg23442323 (gene:CD109): -3.66, <i>p</i> = 0.68<br>cg26976437 (gene:ITGK): -3.66, <i>p</i> = 0.68<br>cg12259537 (gene:ZNF606): -3.66, <i>p</i> = 0.68<br>cg24134767 (gene:HTR3A): -3.67, <i>p</i> = 0.68<br>cg14601284 (gene:PLXDC1): -3.67, <i>p</i> = 0.68<br>Placenta DZ<br>cg04188838 (gene:CTP2C19): -3.39, <i>p</i> = 0.73<br>cg10430690 (gene:KALRN1): -3.43, <i>p</i> = 0.73<br>cg02768897 (gene:KRTAP13-1): -3.48, <i>p</i> = 0.73<br>cg10918419 (gene:CBorf55): -3.49, <i>p</i> = 0.73<br>cg06324671 (gene:KRTAP19-7): -3.49, <i>p</i> = 0.73<br>cg13757640 (gene:ARHGAP8): -3.50, <i>p</i> = 0.73<br>cg12924408 (gene:RABLA4): -3.51, <i>p</i> = 0.73<br>cg26610808 (gene:BL0C152): -3.51, <i>p</i> = 0.73<br>cg08088390 (gene:DEFB125): -3.51, <i>p</i> = 0.73<br>cg11530960 (gene:DMRT2): -3.52, <i>p</i> = 0.73 | Batch effects        |
| Córdova-Palomera (2014), Spain [74] | 17 MZ twin pairs (47)           | Birth weight, (Birth)                               | 248 CpGs sites at t: IGF2, IGF2BP1, IGF2BP2, IGF2BP3 measured using Infinium Human Methylation450 BeadChip | Blood                                          | 37.8 $\pm$ 1.2y (22–56)                             | Inter-individual association (i.e. not birth weight discordance) between IGF2BP2 methylation (mean methylation of cg07075026 & cg20569754) and birth weight:<br>$\beta$ = 83.3 $\times 10^{-4}$ , <i>p</i> = 0.033. Each kg increase in birth weight corresponding to approximately 8.33% rise in methylation fraction.<br>Other results with birth weight NR                                                                                                                                                                                                                                                                                                                                                                                                                                                                                                                                                                                                                                                                                                                                                                                                                                                                                                                                                                                                                                                                                                                                                                                                                                                                                                                                                                                                                                                                                                                                                                                                                                                                                                                                                                                                                                                                                                                                                                                                                                                                                                                                                                                                                                                                                                                                                                                                                                                                                                                                                                                                                                                                                                                                                                                                                                                                                                                                                                                                                                                                                                         | Sex, age, IQ, and GA |

(Continued)

Table 1. (Continued)

| First author (year), country | Cohort, N (% female)                       | Early life variable (mean age ± SD (age range)) | DNA methylation                                                                                                      | Tissue | Mean age at epigenetic measure ±SD (age range) | Main result                                                                                                                                                                                                                                                                                                                                                                                                                                                                                                                                                                                                                                                                                                                                                                                                                                                                                           | Confounders      |
|------------------------------|--------------------------------------------|-------------------------------------------------|----------------------------------------------------------------------------------------------------------------------|--------|------------------------------------------------|-------------------------------------------------------------------------------------------------------------------------------------------------------------------------------------------------------------------------------------------------------------------------------------------------------------------------------------------------------------------------------------------------------------------------------------------------------------------------------------------------------------------------------------------------------------------------------------------------------------------------------------------------------------------------------------------------------------------------------------------------------------------------------------------------------------------------------------------------------------------------------------------------------|------------------|
| Souron (2013), Belgium [75]  | EPPTIS, 17 MZ monozygotic twin pairs (100) | Birth weight (GAD: 37.9±2.4w (34–42))           | Infinium Human Methylation450 BeadChip & LINE-1 & HERVK using methylation-dependent primer extension assays (SIRPHE) | Saliva | 34.4± 7.1y (22–45)                             | 3,153 CpGs differentially methylated between heavy and light co-twins ( $p < 0.01$ ), of which 45 show sensible absolute mean methylation differences ( $\beta$ -value difference $> 0.05$ )<br>Validation analysis of 8 selected BW-MVPs: mean difference(SD) in heavy vs. light twins:<br>cg14123607(A/PHEA1): 0.07(0.05), $p = 0.0008$<br>cg12170649(A/PHEA2): -0.06(0.05), $p < 0.0001$<br>cg26404226(AA): -0.05(0.04), $p < 0.0001$<br>cg15487251(GFZBP2): -0.05(0.05), $p = 0.002$<br>cg10362113(PAPOLA): 0.06(0.07), $p = 0.0008$<br>cg02409150(PHKG2): -0.06(0.05), $p < 0.0001$<br>cg15049370(PPARGC1B): -0.07(0.07), $p = 0.002$<br>cg22768222(BUNX2): 0.06(0.07), $p = 0.008$<br>Differences remain in the range of technical variation, arguing against a reproducible biological effect.<br>Analysis of methylation in repetitive elements showed no significant intra-pair differences. | Cell composition |
| MHL (2006), UK [76]          | TEDS, 12 MZ twin pairs (50)                | Birth weight, (Birth)                           | COMT using pyrosequencing                                                                                            | Buccal | 5y                                             | Average methylation difference: (%) between birth weight discordant pairs:<br>CpG1: 10.3<br>CpG2: 16.1<br>Average: 13.19                                                                                                                                                                                                                                                                                                                                                                                                                                                                                                                                                                                                                                                                                                                                                                              |                  |

\*Studies spanning more than one exposure may appear twice in the table;

\*\* Abstract;

AA: Age acceleration; Abw%: Percentage of Birth Weight Difference; AGA: Average for Gestational Age; ALSPAC: Avon Longitudinal Study of Parents and Children; ARIES: Accessible Resource for Integrated Epigenomic Studies; BMI: Body Mass Index; BSCC: Bogota School Children Cohort; BWP: Birth Weight Percentile; BW-MVP: Birth Weight-Associated Methylation Variable Positions; CANDLE: Conditions Affecting Neurocognitive Development and Learning in Early Childhood Study; CCCEH: The Northern Manhattan Mothers and Newborns Study of the Columbia Center for Children's Environmental Health; CI: Confidence Interval; COBRA: Combined Bisulfite Restriction Analysis; CVD: Cardiovascular Disease; DMR: Differentially Methylated Regions; DPM: Disintegrations Per Minute; DTR: Danish Twin Registry; DZ: Dizygotic twins; EFPTS: East Flanders Prospective Twin Survey; EWAS: Epigenome Wide Association Study; FDR: False Discovery Rate; FT: Full Term; GAD: Gestational age at delivery; GUSTO: Growing up in Singapore towards Healthy Outcomes; HBW: High Birth Weight; IQR: Interquartile Range; ISS: Idiopathic Short Stature; LBW: Low birth weight; LGA: large for gestational age; LUMA: Luminometric Methylation Assay; M: Months; MoBa: Norwegian Mother and Child Cohort; MZ: Monozygotic twin; NBW: Normal Birth Weight; NEST: Newborn Epigenetics Study; NGT: Normal Glucose Tolerance; NR: Not Reported; NTR: Netherlands Twin Register; OR: Odds Ratio; PAH: Princess Anne Hospital Study; PC: Principle Component; PROGRESS: Programming Research in Obesity, Growth Environment and Social Stress; qRT-PCR: Reverse Transcriptase Polymerase Chain Reaction; SD: Standard Deviation; SE: Standard Error; SGA: Small for Gestational Age; SEPP: Socioeconomic Position; SVA: Surrogate Variable Analysis; SWS: Southampton Women's Study; TEDS: Twins Early Development Study; THREE: Baltimore Tracking Health Related to Environmental Exposures Study; VLBW: Very Low Birth Weight; VPT: Very Preterm; W: Week; WMHP: Women's Mental Health Program; Y: Years;

<https://doi.org/10.1371/journal.pone.0201672.t001>

**Table 2. Nutrition in early life and epigenetics.** \* (Organised by, exposure, DNA methylation (epigenome wide, global methylation, imprinted genes, other genes).

| First author (year), country                    | Cohort, N (% female)                                                                  | Early life variable (mean age ± SD (age range))                      | DNA methylation                                                                              | Tissue     | Mean age at epigenetic measure ± SD (age range) | Main result                                                                                                                                                                                                                                                                                                                                                                                                                                                                                                                                                                                                                                                                                                                                                                                                                                                                                                                                                                                                                                                                                                                                                                                                                                                                                                                                                                                                                                                                                                                                                                                                                                                                                                                                                                                                                                                                                                                                                                     | Confounders                                                                                                         |
|-------------------------------------------------|---------------------------------------------------------------------------------------|----------------------------------------------------------------------|----------------------------------------------------------------------------------------------|------------|-------------------------------------------------|---------------------------------------------------------------------------------------------------------------------------------------------------------------------------------------------------------------------------------------------------------------------------------------------------------------------------------------------------------------------------------------------------------------------------------------------------------------------------------------------------------------------------------------------------------------------------------------------------------------------------------------------------------------------------------------------------------------------------------------------------------------------------------------------------------------------------------------------------------------------------------------------------------------------------------------------------------------------------------------------------------------------------------------------------------------------------------------------------------------------------------------------------------------------------------------------------------------------------------------------------------------------------------------------------------------------------------------------------------------------------------------------------------------------------------------------------------------------------------------------------------------------------------------------------------------------------------------------------------------------------------------------------------------------------------------------------------------------------------------------------------------------------------------------------------------------------------------------------------------------------------------------------------------------------------------------------------------------------------|---------------------------------------------------------------------------------------------------------------------|
| Maternal dietary intake / nutritional biomarker |                                                                                       |                                                                      |                                                                                              |            |                                                 |                                                                                                                                                                                                                                                                                                                                                                                                                                                                                                                                                                                                                                                                                                                                                                                                                                                                                                                                                                                                                                                                                                                                                                                                                                                                                                                                                                                                                                                                                                                                                                                                                                                                                                                                                                                                                                                                                                                                                                                 |                                                                                                                     |
| Joubert (2016), Norway & The Netherlands [85]   | MoBA: 1275 (NR)<br>Generation R: 713 (NR)                                             | Plasma folate                                                        | Infinium Human Methylation450 BeadChip                                                       | Cord blood | Birth                                           | 443 FDR-significant CpGs were differentially methylated in cord blood in relation to maternal folate. 48 CpGs met Bonferroni threshold ( $p < 1.19 \times 10^{-5}$ ). Selected loci from meta-analysis. Cor(±SE), p:<br>cg13908975(GRM468): -0.012(0.002), $p = 6.7 \times 10^{-7}$<br>cg18574254(GRM468): -0.011(0.002), $p = 3.27 \times 10^{-9}$<br>cg22591480(SLC16A12): -0.008(0.002), $p = 1.34 \times 10^{-5}$<br>cg14920044(SLC16A12): -0.011(0.003), $p = 4.31 \times 10^{-6}$<br>cg22482929(OPCML): 0.010(0.002), $p = 6.60 \times 10^{-6}$<br>cg22629528(OPCML): 0.019(0.005), $p = 2.91 \times 10^{-5}$<br>cg26283170(OPCML): 0.009(0.002), $p = 1.30 \times 10^{-5}$<br>cg24804179(PRPH): -0.007(0.002), $p = 8.05 \times 10^{-6}$<br>cg05775627(PRPH): -0.007(0.002), $p = 1.01 \times 10^{-5}$<br>cg16010628(PRPH): -0.005(0.001), $p = 1.73 \times 10^{-6}$<br>cg05632740(PRSS21): 0.009(0.002), $p = 4.77 \times 10^{-6}$<br>cg02206564(PRSS21): 0.011(0.003), $p = 6.21 \times 10^{-6}$<br>cg22730830(PRSS21): 0.013(0.003), $p = 3.99 \times 10^{-5}$<br>cg01232511(PRSS21): 0.010(0.003), $p = 1.23 \times 10^{-6}$<br>cg10612259(LHX1): -0.011(0.002), $p = 9.10 \times 10^{-6}$<br>cg01196547(LHX1): -0.002(0.001), $p = 2.09 \times 10^{-5}$<br>cg11775595(AFC2): -0.015(0.003), $p = 1.64 \times 10^{-6}$<br>cg14907738(AFC2): -0.006(0.001), $p = 8.57 \times 10^{-6}$<br>cg27150718(AFC2): -0.009(0.002), $p = 5.81 \times 10^{-7}$<br>cg03165176(AFC2): -0.012(0.003), $p = 4.48 \times 10^{-5}$<br>cg14559388(AFC2): -0.003(0.001), $p = 4.98 \times 10^{-6}$<br>cg04624885(AFC2): -0.010(0.002), $p = 1.56 \times 10^{-5}$<br>cg19857071(AFC2): -0.009(0.002), $p = 4.64 \times 10^{-9}$<br>cg16613938(AFC2): -0.016(0.003), $p = 3.95 \times 10^{-8}$<br>cg23291200(AFC2): -0.010(0.002), $p = 1.72 \times 10^{-9}$<br>cg13793157(KLKB3): -0.009(0.002), $p = 4.00 \times 10^{-5}$<br>cg10078829(KLKB3): -0.007(0.002), $p = 1.84 \times 10^{-5}$ | Maternal age, education, smoking during pregnancy, parity, batch effects                                            |
| Boeke (2012), US [86]                           | Project Viva,<br>Periconceptual intake: 516<br>Second trimester intake: 484<br>(47.7) | FFQ for B-vitamins (32 ± 5.1y)                                       | LINE-1 using pyrosequencing                                                                  | Cord blood | Birth                                           | 0–4 weeks gestation, $\beta = \%SMC$ difference in LINE-1 methylation for increment in 1 SD in nutrient<br><i>Methyl donor (Cumulative Index)</i> : $\beta = -0.02 (-0.04, 0.01)$ , $p = 0.17$<br><i>maternal vitamin B12 (µg/d)</i> : $\beta = 0.01 (-0.06, 0.08)$ , $p = 0.70$<br><i>maternal betaine (mg/d)</i> : $\beta = -0.04 (-0.11, 0.03)$ , $p = 0.24$<br><i>maternal choline (mg/d)</i> : $\beta = -0.02 (-0.08, 0.04)$ , $p = 0.45$<br><i>maternal folate (µg/d)</i> : $\beta = -0.03 (-0.10, 0.03)$ , $p = 0.32$<br>Second trimester, $\beta = \%SMC$ difference in LINE-1 methylation for increment in 1 SD for nutrients<br><i>maternal vitamin B12</i> : $\beta = -0.02 (-0.09, 0.06)$ , $p = 0.64$<br><i>maternal betaine</i> : $\beta = -0.02 (-0.10, 0.05)$ , $p = 0.50$<br><i>maternal choline</i> : $\beta = -0.004 (-0.07, 0.06)$ , $p = 0.98$<br><i>maternal folate</i> : $\beta = -0.02 (-0.08, 0.05)$ , $p = 0.61$                                                                                                                                                                                                                                                                                                                                                                                                                                                                                                                                                                                                                                                                                                                                                                                                                                                                                                                                                                                                                                      | Other methyl donors, child's sex, mother's age, race, smoking, pregnancy, weight gain, education, cadmium intake    |
| Pauwels (2017), Belgium [87]                    | MANOE, 115(47.8)                                                                      | FFQ for methyl donor intake & folic acid supplementation (31 ± 3.6y) | Global DNA methylation using mass-spectrometry method & DNMT1, LEP, RXRA, IGF2 DMR using PCR | Cord blood | Birth (GAD 39.6 ± 0.9w)                         | Before pregnancy (n = 24) $\beta$ (95%CI), p:<br><i>LEP</i> :<br>Betaine: -0.13(-0.345, 3.19), $p = 0.94$<br>Choline: 1.48(-1.48, 4.45), $p = 0.31$<br>Folate: -0.33(-2.75, 2.09), $p = 0.78$<br>Methionine: 0.427(0.01, 0.85), $p = 0.048$<br><i>DNMT1</i> :<br>Betaine: 0.675(0.04, 1.31), $p = 0.039$<br>Choline: 0.13(-0.52, 0.78), $p = 0.68$<br>Folate: 0.21(-0.3, 0.72), $p = 0.40$<br>Methionine: 0.04(-0.06, 0.14), $p = 0.37$                                                                                                                                                                                                                                                                                                                                                                                                                                                                                                                                                                                                                                                                                                                                                                                                                                                                                                                                                                                                                                                                                                                                                                                                                                                                                                                                                                                                                                                                                                                                         | Maternal age, maternal BMI, maternal smoking before and during each trimester of pregnancy, gestational weight gain |

(Continued)

Table 2. (Continued)

| First author (year), country | Cohort, N (% female) | Early life variable (mean age $\pm$ SD (age range))                                      | DNA methylation                                                                                                                                                           | Tissue     | Mean age at epigenetic measure $\pm$ SD (age range) | Main result                                                                                                                                                                                                                                                                                                                                                                                                                                                                                                                                                                                                                                                                                                                                                                                                                                                                                                                                                                                                                                                                                                                                                                                                                                                                                                                                                                                                                                                                                                                                                                                                                                                                                                                                                                                                                                                                                                                                                                                                                                                                                                                                                                                                                                                                                                                                                                                                                                                                                                                                                                                         | Confounders                                                                      |
|------------------------------|----------------------|------------------------------------------------------------------------------------------|---------------------------------------------------------------------------------------------------------------------------------------------------------------------------|------------|-----------------------------------------------------|-----------------------------------------------------------------------------------------------------------------------------------------------------------------------------------------------------------------------------------------------------------------------------------------------------------------------------------------------------------------------------------------------------------------------------------------------------------------------------------------------------------------------------------------------------------------------------------------------------------------------------------------------------------------------------------------------------------------------------------------------------------------------------------------------------------------------------------------------------------------------------------------------------------------------------------------------------------------------------------------------------------------------------------------------------------------------------------------------------------------------------------------------------------------------------------------------------------------------------------------------------------------------------------------------------------------------------------------------------------------------------------------------------------------------------------------------------------------------------------------------------------------------------------------------------------------------------------------------------------------------------------------------------------------------------------------------------------------------------------------------------------------------------------------------------------------------------------------------------------------------------------------------------------------------------------------------------------------------------------------------------------------------------------------------------------------------------------------------------------------------------------------------------------------------------------------------------------------------------------------------------------------------------------------------------------------------------------------------------------------------------------------------------------------------------------------------------------------------------------------------------------------------------------------------------------------------------------------------------|----------------------------------------------------------------------------------|
| Fryer (2009), UK [88]        | 24 (58.3)            | Folic acid supplementation during pregnancy (29.4-7y)                                    | LINE-1 methylation using pyrosequencing                                                                                                                                   | Cord blood | Birth                                               | <p>Second trimester (n = 89) <math>\beta</math>(95%CI), <i>P</i>:</p> <p><i>LEP</i>:</p> <p>Betaine: -0.575(-1.16, 0.01), <i>p</i> = 0.05</p> <p>Choline: -0.47(-0.95, 0.02), <i>p</i> = 0.058</p> <p>Folate: -0.507(-0.89, -0.13), <i>p</i> = 0.009</p> <p>Methionine: -0.06(-0.14, 0.02), <i>p</i> = 0.15</p> <p><i>DNMT1</i>:</p> <p>Betaine: -0.25(-0.58, 0.09), <i>p</i> = 0.15</p> <p>Choline: -0.301(-0.57, -0.03), <i>p</i> = 0.03</p> <p>Folate: -0.226(-0.45, -0.01), <i>p</i> = 0.045</p> <p>Methionine: -0.04(-0.08, 0.009), <i>p</i> = 0.12</p> <p>Third trimester (n = 89) <math>\beta</math>(95%CI), <i>P</i>:</p> <p><i>RXR<math>\alpha</math></i>:</p> <p>Betaine: 0.35(-1.24, 1.94), <i>p</i> = 0.66</p> <p>Choline: -0.935(-2.08, 0.21), <i>p</i> = 0.11</p> <p>Folate: -1.00(-1.96, -0.04), <i>p</i> = 0.041</p> <p>Methionine: -0.15(-0.35, 0.06), <i>p</i> = 0.16</p> <p><i>DNMT1</i>:</p> <p>Betaine: 0.97(0.36, 3.67), <i>p</i> = 0.008</p> <p>Choline: 0.291(0.1, 0.84), <i>p</i> = 0.022</p> <p>Folate: 0.48(0.22, 1.06), <i>p</i> = 0.07</p> <p>Methionine: 0.87 (0.74, 1.04), <i>p</i> = 0.12</p> <p>Folic acid supplementation</p> <p><i>LEP CpG1 methylation</i></p> <p>&gt; 6 months before conception vs. 3–6 months before conception: 34.6 <math>\pm</math> 6.3% vs. 30.1 <math>\pm</math> 3.6%, <i>p</i> = 0.011</p> <p><i>LEP CpG3 methylation</i></p> <p>&gt; 6 months before conception vs no supplement before conception: 16.2 <math>\pm</math> 4.4% vs. 13.9 <math>\pm</math> 3%, <i>p</i> = 0.036</p> <p><i>RXR<math>\alpha</math> mean methylation</i></p> <p>supplements during entire pregnancy vs. stopping in second trimester: 12.3 <math>\pm</math> 1.9% vs. 11.1 <math>\pm</math> 2%, <i>p</i> = 0.008</p>                                                                                                                                                                                                                                                                                                                                                                                                                                                                                                                                                                                                                                                                                                                                                                                                                                        | Sex, GA maternal age, parity, and BMI and cord serum folate, plasma homocysteine |
| Haggerty (2013), UK [81]     | 913 (46)             | FFQ for folate intake, folic acid supplementation, RBC folate (30.5 (95%CI: 30.2–30.9y)) | <p>LINE-1 methylation using pyrosequencing</p> <p><i>IGF2</i> (4 CpGs), <i>PEG3</i> (7 CpGs), <i>SNRPN</i> (15q11.4 CpGs) <i>LINE-1</i> (4 CpGs) using pyrosequencing</p> | Cord blood | Birth (GAD 3.95 (95%CI: 39.4, 39.6w))               | <p>Maternal folic acid intake: <math>\beta</math> = 0.31, <i>p</i> = 0.15</p> <p>Prescribed folic acid dose during pregnancy: <math>\beta</math> = -0.36, <i>p</i> = 0.31</p> <p><i>LINE-1</i> methylation:</p> <p>maternal folate intake (100ug/d): <math>\beta</math> = 0.002 (-0.20, 0.20), <i>p</i> = 0.98</p> <p>maternal folate supplement use, yes/no (periconceptional): <math>\beta</math> = 0.05 (-0.25, 0.35), <i>p</i> = 0.74</p> <p>maternal folate supplement use, yes/no (first 12 weeks gestation): <math>\beta</math> = 0.16 (-0.23, 0.55), <i>p</i> = 0.42</p> <p>maternal folate supplement use, yes/no (after 12 weeks): <math>\beta</math> = -0.34 (-0.64, -0.04), <i>p</i> = 0.03</p> <p>maternal RBC folate, 100 nmol/L: <math>\beta</math> = -0.13 (-0.20, -0.05), <i>p</i> = 0.001</p> <p><i>PEG-3</i> methylation:</p> <p>maternal folate intake (100ug/d): <math>\beta</math> = 0.002 (-0.20, 0.2), <i>p</i> = 0.44</p> <p>maternal folate supplement use, yes/no (periconceptional): <math>\beta</math> = -0.02 (-0.40, 0.37), <i>p</i> = 0.94</p> <p>maternal folate supplement use, yes/no (first 12 weeks gestation): <math>\beta</math> = -0.47 (-0.86, -0.08), <i>p</i> = 0.02</p> <p>maternal folate supplement use, yes/no (after 12 weeks): <math>\beta</math> = 0.60 (0.21, 1.00), <i>p</i> = 0.001</p> <p><i>SNRPN</i> methylation:</p> <p>maternal folate intake (100ug/d): <math>\beta</math> = 0.07 (-0.33, 0.46), <i>p</i> = 0.74</p> <p>maternal folate supplement use, yes/no (periconceptional): <math>\beta</math> = -0.22 (-0.36, 0.81), <i>p</i> = 0.46</p> <p>maternal folate supplement use, yes/no (first 12 weeks gestation): <math>\beta</math> = 0.39 (-0.37, 1.15), <i>p</i> = 0.32</p> <p>maternal folate supplement use, yes/no (after 12 weeks): <math>\beta</math> = -0.01 (-0.60, 0.58), <i>p</i> = 0.97</p> <p>maternal RBC folate, 100 nmol/L: <math>\beta</math> = 0.02 (-0.12, 0.15), <i>p</i> = 0.82</p> <p><i>IGF2</i> methylation:</p> <p>maternal folate intake (100ug/d): <math>\beta</math> = 0.23 (-0.21, 0.67), <i>p</i> = 0.32</p> <p>maternal folate supplement use, yes/no (periconceptional): <math>\beta</math> = 0.31 (-0.35, 0.96), <i>p</i> = 0.36</p> <p>maternal folate supplement use, yes/no (first 12 weeks gestation): <math>\beta</math> = -0.10 (-0.95, 0.76), <i>p</i> = 0.83</p> <p>maternal folate supplement use, yes/no (after 12 weeks): <math>\beta</math> = 0.68 (0.02, 1.35), <i>p</i> = 0.04</p> <p>maternal RBC folate, 100 nmol/L: <math>\beta</math> = 0.10 (-0.05, 0.24), <i>p</i> = 0.18</p> |                                                                                  |

(Continued)

Table 2. (Continued)

| First author (year), country                   | Cohort, N (% female)                                                         | Early life variable (mean age $\pm$ SD (age range))                                   | DNA methylation                                                               | Tissue                                                                                                 | Mean age at epigenetic measure $\pm$ SD (age range) | Main result                                                                                                                                                                                                                                                                                                                                                                                                                                                                                                                                                                                                                                                                                                                                                                                                                                                                                                                                                                                                                                                                          | Confounders                                                        |
|------------------------------------------------|------------------------------------------------------------------------------|---------------------------------------------------------------------------------------|-------------------------------------------------------------------------------|--------------------------------------------------------------------------------------------------------|-----------------------------------------------------|--------------------------------------------------------------------------------------------------------------------------------------------------------------------------------------------------------------------------------------------------------------------------------------------------------------------------------------------------------------------------------------------------------------------------------------------------------------------------------------------------------------------------------------------------------------------------------------------------------------------------------------------------------------------------------------------------------------------------------------------------------------------------------------------------------------------------------------------------------------------------------------------------------------------------------------------------------------------------------------------------------------------------------------------------------------------------------------|--------------------------------------------------------------------|
| McKay (2012), UK [89]                          | The North Cumbria Community Genetics Project, Infant: 294 (48) Maternal: 121 | Serum B12 (median 28.6y)                                                              | Global DNA methylation using LUMA & IGF2, IGF2BP3, ZNF75 using pyrosequencing | Cord blood                                                                                             | Birth                                               | Global DNA methylation correlated inversely with maternal vitamin B12 concentrations; $\beta = 0.0002(0.0001)$ , $p = 0.06$ . After adjustment: serum B12: $\beta = 0.00007(0.00007)$ , $p = 0.29$                                                                                                                                                                                                                                                                                                                                                                                                                                                                                                                                                                                                                                                                                                                                                                                                                                                                                   | Sex, GA, infant <i>MTHFR</i> genotype                              |
| Hoyo (2011), US [90]                           | NEST 428 (50)                                                                | Folic acid supplement before (n = 428) and during pregnancy (n = 223) (29 $\pm$ 6.3y) | IGF2 & H19 DMR using pyrosequencing                                           | Cord blood                                                                                             | Birth                                               | Methylation % difference for folic acid supplement before pregnancy:<br>IGF2 methylation:<br>Moderate vs. non-users: 0.28, $p = 0.76$<br>High (i.e. prescribed & over the counter) vs. non-users: -1.15, $p = 0.39$<br>H19 methylation:<br>Moderate vs. non-users: -1.96, $p = 0.03$<br>High vs. non-users: -2.76, $p = 0.04$<br>Methylation % difference for folic acid supplement during pregnancy:<br>IGF2 methylation:<br>Moderate vs. non-users: 0.75, $p = 0.59$<br>High vs. non-users: 0.25, $p = 0.93$<br>H19 methylation:<br>Moderate vs. non-users: -2.87, $p = 0.02$<br>High vs. non-users: -4.90, $p = 0.05$                                                                                                                                                                                                                                                                                                                                                                                                                                                             | Maternal education, race, mode of delivery, cigarette smoking, sex |
| Stegers-Therissen (2009), The Netherlands [62] | HAVEN study controls 120 (~58)                                               | Folic acid supplementation during pregnancy 400 $\mu$ g/day vs. no supplement         | IGF2 (5 CpGs) using mass-spectrometry based method                            | Blood                                                                                                  | 17 months                                           | Mean (SD) of IGF2 methylation in childhood without maternal exposure to folic acid n = 34 vs. exposed n = 86:<br>0.47(0.007) vs. 0.495(0.004), $p = 0.014$<br>Adjusted analysis: mean difference in IGF2 methylation 4.5% (1.8) with maternal exposure to folic acid vs unexposed, $p = 0.014$                                                                                                                                                                                                                                                                                                                                                                                                                                                                                                                                                                                                                                                                                                                                                                                       | Maternal education                                                 |
| Lobe (2013), Australia [91]                    | PETIS 95 twin pairs (65 MZ & 40 DZ) (~50%)                                   | Folate and macronutrient intake                                                       | IGF2 and H19 DMRs using mass-spectrometry based method                        | HUVECs, (CBMCs and granulocytes), ectoderm (buccal epithelium) and extra embryonic ectoderm (placenta) | Birth (GAD median 37.0 $\pm$ 1.54w)                 | Difference (p) in absolute percentage methylation in all tissues combined<br>All Assays combined<br>Folate: 0.50(0.44)<br>Vitamin B12 (z-score): -0.23(0.24)<br>Homocysteine(z-score): 0.27(0.29)<br>Macronutrients (z-score): 0.37(0.17)<br>H19 promoter DMR<br>Folate: -1.70(0.024)<br>Vitamin B12 (z-score): -0.97(0.002)<br>Homocysteine(z-score): 0.10(0.75)<br>Macronutrients (z-score): 0.80(0.049)<br>IGF2/H19 ICR<br>Folate: 0.40(0.69)<br>Vitamin B12 (z-score): -0.23(0.54)<br>Homocysteine(z-score): 0.40(0.29)<br>Macronutrients (z-score): 0.20(0.050)<br>IGF2 DMR0<br>Folate: 0.90(0.46)<br>Vitamin B12 (z-score): 0.23(0.55)<br>Homocysteine(z-score): 0.37(0.30)<br>Macronutrients (z-score): 0.43(0.27)<br>IGF2 DMR2<br>Folate: 2.90(0.035)<br>Vitamin B12 (z-score): 0.27(0.63)<br>Homocysteine(z-score): 0.17(0.72)<br>Macronutrients (z-score): 0.10(0.77)<br>Differences in coefficients between cell types<br>Folate: HUVECs vs buccal -4.5%; $p = 0.026$ .<br>Vitamin B12 z-score: Granulocytes vs buccal (2.1%); $p = 0.004$ .<br>No other difference found |                                                                    |

(Continued)



Table 2. (Continued)

| First author (year), country               | Cohort, N (% female) | Early life variable (mean age $\pm$ SD (age range))                       | DNA methylation                                                           | Tissue     | Mean age at epigenetic measure $\pm$ SD (age range) | Main result                                                                                                                                                                                                                                                                                                                                                                                                                                                                                                                                                                                                                                                                                                                                                                                                                                                                                                                                                                                                                                                                                                                                                                                                                                                                        | Confounders                                                                                                                                                                                          |
|--------------------------------------------|----------------------|---------------------------------------------------------------------------|---------------------------------------------------------------------------|------------|-----------------------------------------------------|------------------------------------------------------------------------------------------------------------------------------------------------------------------------------------------------------------------------------------------------------------------------------------------------------------------------------------------------------------------------------------------------------------------------------------------------------------------------------------------------------------------------------------------------------------------------------------------------------------------------------------------------------------------------------------------------------------------------------------------------------------------------------------------------------------------------------------------------------------------------------------------------------------------------------------------------------------------------------------------------------------------------------------------------------------------------------------------------------------------------------------------------------------------------------------------------------------------------------------------------------------------------------------|------------------------------------------------------------------------------------------------------------------------------------------------------------------------------------------------------|
| Azzi (2014), France [43]                   | EDEN 254(NR)         | FFQ for B-vitamins & supplementation (during pregnancy (29.8 $\pm$ 4.4y)) | ZAC1 DMR using methylation-specific PCR                                   | Cord blood | Birth (GA at birth 39.5 $\pm$ 1.5)                  | Spearman's rank partial correlation coefficients<br>Prior to pregnancy:<br>Vitamin B2:0.14, $p = 0.04$<br>Vitamin B5:0.04, $p = 0.60$<br>Vitamin B6:0.04, $p = 0.49$<br>Vitamin B9:0.02, $p = 0.74$<br>Vitamin B12:0.11, $p = 0.08$<br>Last 3 months of pregnancy:<br>Vitamin B2:0.11, $p = 0.09$<br>Vitamin B3:0.08, $p = 0.22$<br>Vitamin B6:0.04, $p = 0.5$<br>Vitamin B9:0.04, $p = 0.56$<br>Vitamin B12:0.02, $p = 0.79$<br>No association with folic acid supplementation and/or the use of a combination of micronutrients either prior to or during pregnancy (estimates not provided)<br>Variable, % absolute methylation change (SE), $p$<br>No folic acid:0.1(0.8) $p = 0.91$                                                                                                                                                                                                                                                                                                                                                                                                                                                                                                                                                                                           | Batch, correlation between 7 CpGs.                                                                                                                                                                   |
| Okermann-Bors (2010), The Netherlands [61] | 120 (50)             | Folic acid supplementation                                                | LEP using mass spectrometry based method                                  | Blood      | 17 $\pm$ 2.5m                                       | Phosphatidyl choline was significantly correlated with newborn DNA methylation at a subset of loci<br>Promoter P2: Mean change per SD of each characteristic ( $p$ ):<br>Maternal blood serum folate: 0.05 (0.47)<br>Maternal blood serum vitamin B12: 0.09 (0.19)<br>Promoter P3: Mean change per SD of each characteristic ( $p$ ):<br>Maternal blood serum folate: 0.049 (0.47)<br>Maternal blood serum vitamin B12: -0.22 (0.001)                                                                                                                                                                                                                                                                                                                                                                                                                                                                                                                                                                                                                                                                                                                                                                                                                                              | Mother's age, maternal prepregnancy BMI, weight gain during pregnancy, mother's highest education level, parity, supplementation intake during pregnancy, birth weight and birth length, sex, and GA |
| Adkins (2010), NR** [92]                   | 30 (NR)              | Biomarkers on one carbon pathway                                          | -15,000 loci (Details not specified)                                      | NR         | Birth                                               |                                                                                                                                                                                                                                                                                                                                                                                                                                                                                                                                                                                                                                                                                                                                                                                                                                                                                                                                                                                                                                                                                                                                                                                                                                                                                    |                                                                                                                                                                                                      |
| Ba (2011), China [93]                      | 99 (48)              | B-vitamin biomarker (27.8 $\pm$ 5.3y)                                     | IGF2 promoters using methylation-specific PCR                             | Cord blood | Birth (96% GAD 37-41w)                              | MEG3 methylation $\beta = -2.02$ (0.58), $p = 0.001$ for Q4 vs Q1<br>NNAT methylation $\beta = -1.34$ (0.73), $p = 0.07$ for Q3 vs Q1<br>PEG10/SGCE methylation $\beta = -0.14$ (0.33), $p = 0.66$ for Q4 vs Q1<br>MEG3-IG methylation $\beta = -0.68$ (0.61), $p = 0.27$ for Q4 vs Q1<br>PLAG1 methylation $\beta = -1.01$ (0.40), $p = 0.01$ for Q3 vs Q1<br>PEG3 methylation $\beta = 0.43$ (0.22), $p = 0.03$ for Q2 vs Q1<br>PEG3/MEST methylation $\beta = 0.39$ (0.44), $p = 0.37$ for Q4 vs Q1<br>H19 methylation $\beta = 0.09$ (0.33), $p = 0.78$ for Q4 vs Q1<br>IGR2 methylation $\beta = -0.04$ (0.43), $p = 0.004$ for Q2 vs Q1                                                                                                                                                                                                                                                                                                                                                                                                                                                                                                                                                                                                                                      | Maternal race, sex, cigarette smoking, GAD, GA at blood draw, physical activity, prepregnancy BMI, and delivery route                                                                                |
| Hoyo (2014), US [35]                       | NEST 496 (49.7)      | Erythrocyte folate (first trimester)                                      | IGF2, H19, DLK1, MEG3, PEG3, MEST, PEG10, SGCE, NNAT using pyrosequencing | Cord blood | Birth                                               | H19 methylation [BSE]<br>serum B12 $\beta = -0.41$ (0.57), $p = 0.48$ for Q4 vs Q1<br>serum pyridoxal phosphate: $\beta = -0.07$ (0.63), $p = 0.91$ for Q4 vs Q1<br>serum 4-pyridoxic acid $\beta = -0.57$ (0.61), $p = 0.35$ for Q4 vs Q1<br>serum homocysteine: $\beta = 1.01$ (0.59), $p = 0.09$ for Q2 vs Q1<br>MEG3 methylation [BSE]<br>serum B12 $\beta = -0.93$ (0.85), $p = 0.27$ for Q4 vs Q1<br>serum pyridoxal phosphate: $\beta = 3.24$ (0.89), $p < 0.01$ for Q4 vs Q1<br>serum 4-pyridoxic acid $\beta = 1.62$ (0.87), $p = 0.06$ for Q4 vs Q1<br>serum homocysteine: $\beta = 1.60$ (0.87), $p = 0.07$ for Q4 vs Q1<br>SGCE/PEG10 methylation [BSE]<br>serum B12 $\beta = 0.47$ (0.67), $p = 0.48$ for Q4 vs Q1<br>serum pyridoxal phosphate: $\beta = -0.30$ (0.81), $p = 0.71$ for Q4 vs Q1<br>serum 4-pyridoxic acid $\beta = 1.46$ (0.74), $p = 0.05$ for Q2 vs Q1<br>serum homocysteine: $\beta = 1.43$ (0.77), $p = 0.06$ for Q2 vs Q1<br>PLAG1 methylation [BSE]:<br>serum B12 $\beta = 1.79$ (0.96), $p = 0.06$ for Q4 vs Q1<br>serum pyridoxal phosphate $\beta = -0.11$ (1.04), $p = 0.91$ for Q4 vs Q1<br>serum 4-pyridoxic acid $\beta = -0.15$ (0.99), $p = 0.88$ for Q4 vs Q1<br>serum homocysteine: $\beta = -1.77$ (0.97), $p = 0.07$ for Q3 vs Q1 | GAD, GA at blood draw, maternal race/ethnicity, maternal smoking and prepregnancy body mass index                                                                                                    |
| McCullough (2016), US [94]                 | NEST 429 (50)        | B-vitamin biomarkers (56% between 20–29y)                                 | H19 MEG3 SGCE/PEG10/PLAG1 DMR using pyrosequencing                        | Cord blood | Birth                                               |                                                                                                                                                                                                                                                                                                                                                                                                                                                                                                                                                                                                                                                                                                                                                                                                                                                                                                                                                                                                                                                                                                                                                                                                                                                                                    |                                                                                                                                                                                                      |

(Continued)

Table 2. (Continued)

| First author (year), country            | Cohort, N (% female)   | Early life variable (mean age $\pm$ SD (age range)) | DNA methylation                                                                                                                                                                                                                 | Tissue                                                 | Mean age at epigenetic measure $\pm$ SD (age range) | Main result                                                                                                                                                                                                                                                                                                                                                                                                                                                                                                                                                                                                                                                                                                                                                                                                                                                                                                                                                                                                                                                                                                                                                                                                                                                                                                                                                                                                                                                                                                                                                                                                                                                                                                                                                                                                                                                                                                                                                                                                                                                                                                                                                                                                                                                                                                                                                                                                                                                                                                                                                                                                                                                                                                                                                                                                                                                                                                                                                                                                                                                                                                                                                                                                                                                                                                                                                                                                                                                                           | Confounders |
|-----------------------------------------|------------------------|-----------------------------------------------------|---------------------------------------------------------------------------------------------------------------------------------------------------------------------------------------------------------------------------------|--------------------------------------------------------|-----------------------------------------------------|---------------------------------------------------------------------------------------------------------------------------------------------------------------------------------------------------------------------------------------------------------------------------------------------------------------------------------------------------------------------------------------------------------------------------------------------------------------------------------------------------------------------------------------------------------------------------------------------------------------------------------------------------------------------------------------------------------------------------------------------------------------------------------------------------------------------------------------------------------------------------------------------------------------------------------------------------------------------------------------------------------------------------------------------------------------------------------------------------------------------------------------------------------------------------------------------------------------------------------------------------------------------------------------------------------------------------------------------------------------------------------------------------------------------------------------------------------------------------------------------------------------------------------------------------------------------------------------------------------------------------------------------------------------------------------------------------------------------------------------------------------------------------------------------------------------------------------------------------------------------------------------------------------------------------------------------------------------------------------------------------------------------------------------------------------------------------------------------------------------------------------------------------------------------------------------------------------------------------------------------------------------------------------------------------------------------------------------------------------------------------------------------------------------------------------------------------------------------------------------------------------------------------------------------------------------------------------------------------------------------------------------------------------------------------------------------------------------------------------------------------------------------------------------------------------------------------------------------------------------------------------------------------------------------------------------------------------------------------------------------------------------------------------------------------------------------------------------------------------------------------------------------------------------------------------------------------------------------------------------------------------------------------------------------------------------------------------------------------------------------------------------------------------------------------------------------------------------------------------------|-------------|
| Dominguez-Salas (2014), The Gambia [95] | Keneba Cohort 126 (43) | One-carbon metabolism biomarkers (18–45y)           | Metastable epialleles; <i>BOLA3</i> , <i>LOC654433</i> , <i>EXD3</i> , <i>ZFVZ8</i> using methylation-specific amplification microarray and pyrosequencing<br><i>RBM46</i> , <i>PARD6G</i> , <i>ZNF678</i> using pyrosequencing | Blood lymphocytes (n = 126),<br>Hair follicle (n = 87) | 3.6 $\pm$ 0.9m                                      | Effect sizes are 1 standardised $\beta$ coefficient for change in mean DNA methylation (combined MFA) per 1 SD of the predictor and 2) odds ratio per change in predictor:<br>Peripheral blood lymphocyte:<br><i>serum folate umol/l</i> :<br>$\beta$ : $\beta = 0.02$ (-0.07,0.12), OR = 1.03 (0.90,1.17), $p = 0.62$<br><i>serum vitamin B2 /EGRAC</i> : $\beta = 0.09$ (0.00,0.19), OR = 1.19 (0.98,1.46), $p = 0.05$<br><i>serum vitamin B12 pmol/l</i> : $\beta = 0.03$ (-0.07,0.14), OR = 1.04 (0.91,1.19), $p = 0.54$<br><i>serum active vitamin B12 pmol/l</i> : $\beta = -0.04$ (-0.16,0.07), OR = 0.98 (0.87–1.11), $p = 0.45$<br><i>serum choline umol/l</i> : $\beta = -0.01$ (-0.12,0.09), OR = 0.95 (0.80–1.12), $p = 0.80$<br><i>serum betaine umol/l</i> : $\beta = 0.05$ (-0.10,0.20), OR = 1.03 (0.89–1.19), $p = 0.49$<br><i>serum dimethyl glycine umol/l</i> : $\beta = -0.06$ (-0.16,0.04), OR = 0.95 (0.86,1.04), $p = 0.21$<br><i>serum betaine/dimethyl glycine</i> : $\beta = 0.08$ (-0.02,0.17), OR = 1.05 (0.97,1.14), $p = 0.11$<br><i>serum S-adenosylmethionine umol/l</i> : $\beta = -0.06$ (-0.17,0.05), OR = 0.79 (0.58,1.08), $p = 0.28$<br><i>serum S-adenosylhomocysteine umol/l</i> : $\beta = -0.09$ (-0.18,0.01), OR = 0.88 (0.75,1.02), $p = 0.07$<br>maternal <i>serum S-adenosylmethionine</i> : $\beta = -0.06$ (-0.16,0.04), OR = 0.95 (0.86,1.04), $p = 0.21$<br><i>serum methionine umol/l</i> : $\beta = 0.07$ (-0.05,0.18), OR = 1.19 (0.90,1.56), $p = 0.18$<br><i>serum homocysteine umol/l</i> : $\beta = -0.14$ (-0.23,-0.05), OR = 0.80 (0.68,0.93), $p = 0.003$<br>maternal <i>serum vitamin B6 umol/l</i> : $\beta = -0.16$ (-0.27,-0.04), OR = 0.82 (0.71,0.94), $p = 0.005$<br><i>serum cysteine umol/l</i> : $\beta = -0.19$ (-0.31,-0.07), OR = 0.45 (0.30,0.68), $p = 0.002$<br>Hair follicle:<br><i>serum folate umol/l</i> : $\beta = 0.01$ (-0.11,0.13), OR = 1.00 (0.86,1.16), $p = 0.81$<br><i>serum vitamin B2 /EGRAC</i> : $\beta = 0.11$ (0.00,0.22), OR = 1.22 (0.97,1.53), $p = 0.04$<br><i>serum vitamin B12 pmol/l</i> : $\beta = 0.08$ (-0.06,0.23), OR = 1.06 (0.88,1.26), $p = 0.25$<br><i>serum active vitamin B12 pmol/l</i> : $\beta = -0.03$ (-0.18,0.13), OR = 1.00 (0.85,1.18), $p = 0.75$<br><i>serum choline umol/l</i> : $\beta = 0.01$ (-0.13,0.14), OR = 0.96 (0.77,1.19), $p = 0.91$<br><i>serum betaine umol/l</i> : $\beta = 0.13$ (-0.07,0.32), OR = 1.06 (0.88,1.28), $p = 0.19$<br><i>serum dimethyl glycine umol/l</i> : $\beta = -0.02$ (-0.15,0.11), OR = 0.97 (0.86,1.09), $p = 0.79$<br><i>serum betaine/dimethyl glycine</i> : $\beta = 0.06$ (-0.06,0.18), OR = 1.04 (0.94,1.15), $p = 0.34$<br><i>serum S-adenosylmethionine umol/l</i> : $\beta = -0.05$ (-0.19,0.09), OR = 0.85 (0.57,1.27), $p = 0.48$<br><i>serum S-adenosylhomocysteine umol/l</i> : $\beta = -0.12$ (-0.25,0.01), OR = 0.84 (0.69,1.03), $p = 0.06$<br><i>serum S-adenosylmethionine/S-adenosylhomocysteine</i> : $\beta = 0.09$ (-0.03,0.22), OR = 1.15 (0.93,1.41), $p = 0.13$<br><i>serum methionine umol/l</i> : $\beta = 0.00$ (-0.13,0.14), OR = 0.99 (0.70,1.38), $p = 0.96$<br><i>serum homocysteine umol/l</i> : $\beta = -0.15$ (-0.27,-0.03), OR = 0.82 (0.67,1.00), $p = 0.02$<br>maternal <i>serum vitamin B6 umol/l</i> : $\beta = -0.12$ (-0.26,0.02), OR = 0.86 (0.73,1.02), $p = 0.08$<br><i>serum cysteine umol/l</i> : $\beta = -0.20$ (-0.36,-0.04), OR = 0.43 (0.25,0.72), $p = 0.01$ |             |

(Continued)

Table 2. (Continued)

| First author (year), country                             | Cohort, N (% female)                    | Early life variable (mean age $\pm$ SD (age range)) | DNA methylation                                                                                       | Tissue             | Mean age at epigenetic measure $\pm$ SD (age range) | Main result                                                                                                                                                                                                                                                                                                                                                                                                                                                                                                                                                                                                                                                                                                                                                                                                                                                                                                                                                                                                                                                                                                                                                                                                                                                  | Confounders                                                                                    |
|----------------------------------------------------------|-----------------------------------------|-----------------------------------------------------|-------------------------------------------------------------------------------------------------------|--------------------|-----------------------------------------------------|--------------------------------------------------------------------------------------------------------------------------------------------------------------------------------------------------------------------------------------------------------------------------------------------------------------------------------------------------------------------------------------------------------------------------------------------------------------------------------------------------------------------------------------------------------------------------------------------------------------------------------------------------------------------------------------------------------------------------------------------------------------------------------------------------------------------------------------------------------------------------------------------------------------------------------------------------------------------------------------------------------------------------------------------------------------------------------------------------------------------------------------------------------------------------------------------------------------------------------------------------------------|------------------------------------------------------------------------------------------------|
| Rerkasem (2015), Thailand [59]                           | 249 (NR)                                | 24-hour food recall & FFQ in each trimester         | LINE-1 and Alu using COBRA                                                                            | Blood              | 20y                                                 | % Total methylation, $r$ , $p$ (FDR)<br>Maternal Protein intake 1 <sup>st</sup> trim: Alu: 0.18, $p$ = 0.46<br>LINE-1: -0.11, $p$ = 0.75<br>Maternal Protein intake 2 <sup>nd</sup> trim: Alu: -0.08, $p$ = 0.61<br>LINE-1: 0.08, $p$ = 0.61<br>Maternal Protein intake 3 <sup>rd</sup> trim: Alu: 0.04, $p$ = 0.78<br>LINE-1: 0.06, $p$ = 0.78<br>Maternal CHO intake 1 <sup>st</sup> trim: Alu: 0.05, $p$ = 0.81<br>LINE-1: -0.05, $p$ = 0.82<br>Maternal CHO intake 2 <sup>nd</sup> trim: Alu: 0.01, $p$ = 0.87<br>LINE-1: -0.05, $p$ = 0.88<br>Maternal CHO intake 3 <sup>rd</sup> trim: Alu: 0.07, $p$ = 0.74<br>LINE-1: 0.06, $p$ = 0.73<br>Maternal fat intake 1 <sup>st</sup> trim: Alu: -0.11, $p$ = 0.64<br>LINE-1: -0.22, $p$ = 0.46<br>Maternal fat intake 2 <sup>nd</sup> trim: Alu: -0.09, $p$ = 0.87<br>LINE-1: -0.007, $p$ = 0.98<br>Maternal fat intake 3 <sup>rd</sup> trim: Alu: -0.17, $p$ = 0.09<br>LINE-1: 0.06, $p$ = 0.96<br>Maternal energy intake 1 <sup>st</sup> trim: Alu: 0.03, $p$ = 0.82<br>LINE-1: -0.11, $p$ = 0.54<br>Maternal energy intake 2 <sup>nd</sup> trim: Alu: -0.02, $p$ = 0.92<br>LINE-1: -0.03, $p$ = 0.91<br>Maternal energy intake 3 <sup>rd</sup> trim: Alu: -0.008, $p$ = 0.92<br>LINE-1: 0.05, $p$ = 0.88 |                                                                                                |
| Drake (2012), UK [61]                                    | The Motherwell Cohort, 34(64)           | FFQ (early <20w & late pregnancy >20w)              | HSD2 (promotor region), exon 1(C) and 1(F) of GR (exon 1(C) and 1(F)), IGF2 DMRs using pyrosequencing | Blood              | 40 (0.12y)                                          | Correlation of mean CR exon 1F methylation during late pregnancy<br>Meat/w: $r$ = 0.48, $p$ = 0.009<br>Fish/w: $r$ = 0.38, $p$ = 0.048<br>Veg/w: $r$ = 0.67, $p$ < 0.001<br>Bread/w: $r$ = -0.49, $p$ = 0.009<br>Potato/w: $r$ = -0.39, $p$ = 0.04<br>Methylation was increased at a specific CpG sites in HSD2 with increased meat ( $r$ = 0.42, $p$ = 0.03) and fish ( $r$ = 0.40, $p$ = 0.04) intake in late pregnancy.<br>Other results not presented                                                                                                                                                                                                                                                                                                                                                                                                                                                                                                                                                                                                                                                                                                                                                                                                    | Sex, BMI, birth weight.                                                                        |
| Godfrey (2011), UK [96]                                  | PAH 78 (NR)                             | FFQ (GA 15w)                                        | eNOS, SOD1, IL8, P13KCD, RXRA using pyrosequencing                                                    | Cord blood         | Birth                                               | Higher methylation of RXRA but not eNOS was associated with lower maternal CHO intake. Maternal fat and protein intake were not associated with RXRA methylation. No estimates for other nutrients/genes                                                                                                                                                                                                                                                                                                                                                                                                                                                                                                                                                                                                                                                                                                                                                                                                                                                                                                                                                                                                                                                     |                                                                                                |
| Simpkin (2015), UK [58]                                  | AIRE5 1018 (51)                         | Serum selenium & vitamin D                          | Infinium Human Methylation450 BeadChip to estimate Horvath epigenetic age                             | Cord blood & blood | Birth, 7.5y, 17.1y                                  | Correlations between early life variable and age acceleration:<br>Maternal selenium & AA at birth: -0.103, $p$ = 0.06<br>Maternal selenium & AA 7 years: -0.137, $p$ = 0.009<br>Maternal selenium & AA at 17 years: 0.01, $p$ = 0.84<br>Maternal vitamin D & AA at birth: -0.05, $p$ = 0.20<br>Maternal vitamin D & AA at 17 years: -0.002, $p$ = 0.95<br>Maternal vitamin D & AA at 17 years: -0.009, $p$ = 0.82                                                                                                                                                                                                                                                                                                                                                                                                                                                                                                                                                                                                                                                                                                                                                                                                                                            | Cell-type composition                                                                          |
| <b>Early life dietary intake / nutritional biomarker</b> |                                         |                                                     |                                                                                                       |                    |                                                     |                                                                                                                                                                                                                                                                                                                                                                                                                                                                                                                                                                                                                                                                                                                                                                                                                                                                                                                                                                                                                                                                                                                                                                                                                                                              |                                                                                                |
| Simpkin (2015), UK [58]                                  | AIRE5 1018 (51)                         | Breastfeeding                                       | Infinium Human Methylation450 BeadChip to estimate Horvath epigenetic age                             | Cord blood & blood | Birth, 7.5y, 17.1y                                  | Correlations between early life variable and age acceleration:<br>Breastfeeding & AA at birth: $r$ = 0.035, $p$ = 0.30<br>Breastfeeding & AA at 7 years: $r$ = -0.010, $p$ = 0.76<br>Breastfeeding & AA at 17 years: $r$ = 0.026, $p$ = 0.43                                                                                                                                                                                                                                                                                                                                                                                                                                                                                                                                                                                                                                                                                                                                                                                                                                                                                                                                                                                                                 | Cell-type composition                                                                          |
| Rosenrova (2013), Czech Republic [97]                    | Asthmatics:100 (45)<br>Controls:100(45) | Breastfeeding                                       | Infinium Human Methylation27 BeadChip                                                                 | Blood              | 11.62y                                              | Breastfeeding was associated with overall DNA methylation, but no statistical test performed                                                                                                                                                                                                                                                                                                                                                                                                                                                                                                                                                                                                                                                                                                                                                                                                                                                                                                                                                                                                                                                                                                                                                                 |                                                                                                |
| Obermann-Rost (2013), The Netherlands [64]               | 120 (50)                                | Breastfeeding                                       | LEP using mass-spectrometry based method                                                              | Blood              | 17± 2.5m                                            | % absolute methylation change (SE), $p$<br>Duration breast feeding: -0.6 (0.2), $p$ = 0.04                                                                                                                                                                                                                                                                                                                                                                                                                                                                                                                                                                                                                                                                                                                                                                                                                                                                                                                                                                                                                                                                                                                                                                   | Birth, correlation between 7 CpGs, birth weight, growth rate, smoking, BMI, GA, sex folic acid |

(Continued)

Table 2. (Continued)

| First author (year), country | Cohort, N (% female)                                  | Early life variable (mean age $\pm$ SD (age range))                                                                         | DNA methylation                                                                                     | Tissue               | Mean age at epigenetic measure $\pm$ SD (age range) | Main result                                                                                                                                                                                                                                                                                                                                                                                                                                                                                                                                                                                                                                                                                                                                                                                                                                                                                                                                                                                                                            | Confounders                                                                      |
|------------------------------|-------------------------------------------------------|-----------------------------------------------------------------------------------------------------------------------------|-----------------------------------------------------------------------------------------------------|----------------------|-----------------------------------------------------|----------------------------------------------------------------------------------------------------------------------------------------------------------------------------------------------------------------------------------------------------------------------------------------------------------------------------------------------------------------------------------------------------------------------------------------------------------------------------------------------------------------------------------------------------------------------------------------------------------------------------------------------------------------------------------------------------------------------------------------------------------------------------------------------------------------------------------------------------------------------------------------------------------------------------------------------------------------------------------------------------------------------------------------|----------------------------------------------------------------------------------|
| Tao (2013), US [65]          | 639 (100) breast cancer cases                         | Breastfeeding                                                                                                               | <i>E-cadherin</i> , p16 and RAR- $\beta$ 2 using PCR                                                | Breast tumour tissue | 57.5y $\pm$ 11.3                                    | OR (95%CI) for methylation breastfed yes (ref) vs no<br><i>E-cadherin</i><br>Prenatopausal group: 1.21(0.50,2.93)<br>Postmenopausal group: 1.06(0.64,1.77)<br><i>P16</i><br>Prenatopausal group: 2.75(1.14,6.7)<br>Postmenopausal group: 0.79(0.49,1.26)<br><i>RAR-<math>\beta</math>2</i><br>Prenatopausal group: 1.18(0.53,2.62)<br>Postmenopausal group: 1.30(0.83-2.04)                                                                                                                                                                                                                                                                                                                                                                                                                                                                                                                                                                                                                                                            | Age, education, race, oestrogen receptor status                                  |
| Wijnands (2015), UK [98]     | 120 (41.7)                                            | Breastfeeding & lipid biomarkers                                                                                            | <i>LEP</i> & <i>TNFR2</i> using mass-spectrometry based method                                      | Blood                | 17 $\pm$ 2.5m                                       | %Absolute methylation change (i.e. methylation change per SD change in biomarker (SE)) <i>TNFR2</i><br>Total cholesterol: -1.0(0.5), p = 0.036. (Additional adjustment for HDL attenuated the results p = 0.07)<br>Triglycerides: 0.1(0.5), p = 0.773<br>HDL <cholesterol: -1.2(0.5), p = 0.013. (Adjustment for maternal HDL slightly attenuated the association p = 0.08)<br>LDL-cholesterol: -0.8(0.5), p = 1.00<br>%Absolute methylation change (RSE) <i>LEP</i><br>Total cholesterol: -0.6(0.3), p = 0.11<br>Triglycerides: 0.1 (0.4), p = 0.71<br>HDL <cholesterol: -3.4 n(1.5), p = 0.02. (Adjustment for maternal HDL slightly attenuated the association p = 0.041)<br>LDL-cholesterol: -1.7 (1.5), p = 0.25<br>Bonferroni correction attenuated to nonsignificant estimates<br><i>TNFR2</i> methylation was not associated with duration of breastfeeding<br><i>LEP</i> methylation was significantly associated with duration of breastfeeding: -0.6 (95%CI: -1.19, -0.01) per increment in breastfeeding duration category | Bisulfite batch                                                                  |
| Fryer (2011), UK [25]        | 12 (92)                                               | Plasma homocysteine (birth)                                                                                                 | Infinium Human Methylation27 BeadChip                                                               | Cord blood           | Birth                                               | Two clusters were identified following unsupervised hierarchical clustering to identify underlying methylation $\beta$ -value across samples. Plasma homocysteine was lower (p = 0.038) in cluster B. There was no difference in serum folate (estimate not presented). 298 CpGs associated with plasma homocysteine (p < 0.05)                                                                                                                                                                                                                                                                                                                                                                                                                                                                                                                                                                                                                                                                                                        | Sex, GA, maternal age, parity, BMI, serum folate, and maternal folic acid intake |
| Fryer (2009), UK [88]        | 24 (58.3)                                             | Plasma homocysteine & serum folate (birth)                                                                                  | LINE-1 methylation using pyrosequencing                                                             | Cord blood           | Birth                                               | Correlation with LINE-1 methylation:<br><i>Conf plasma homocysteine</i> : $\beta$ = -0.09; p = 0.001 (p = 0.004 following adjustment)<br><i>Conf serum folate</i> : $\beta$ = 0.21; p = 0.34                                                                                                                                                                                                                                                                                                                                                                                                                                                                                                                                                                                                                                                                                                                                                                                                                                           | Sex, GA, maternal age, parity, BMI, serum folate, and maternal folic acid intake |
| McKay (2012), UK [89]        | The North Cumbria Community Genetics Project 294 (48) | RBS folate & serum B12 (GA 39.5 $\pm$ 1.4w)                                                                                 | Global DNA methylation using LUMA & <i>IGF2</i> , <i>IGFBP3</i> , <i>ZNF75</i> using pyrosequencing | Cord blood           | Birth                                               | Methylation of the <i>IGFBP3</i> locus inversely correlated with infant vitamin B12 concentration ( $r$ = -0.16, p = 0.007)                                                                                                                                                                                                                                                                                                                                                                                                                                                                                                                                                                                                                                                                                                                                                                                                                                                                                                            | Sex, GA, infant <i>MTHFR</i> genotype                                            |
| Nafee (2009), UK** [31]      | 24(NR)                                                | Homocysteine (birth)                                                                                                        | LINE-1                                                                                              | Cord blood           | Birth                                               | LINE-1 methylation levels were inversely correlated with cord blood homocysteine (p = 0.01, r = -0.688)                                                                                                                                                                                                                                                                                                                                                                                                                                                                                                                                                                                                                                                                                                                                                                                                                                                                                                                                | Sex, GA, maternal age, parity, BMI, serum folate, and maternal folic acid intake |
| Peng (2012), Columbia [50]   | BSCC 568(53.7)                                        | Erythrocyte folate, plasma vitamin B12, vitamin A ferritin (an indicator of iron status), serum zinc concentrations (5-12y) | LINE-1 using pyrosequencing                                                                         | Blood                | (5-12y)                                             | LINE-1 methylation [ $\beta$ 95%CI] & Erythrocyte Folate (nmol/L), All $P_{trend}$ = 0.51:<br>Q1: n = 139, ref<br>Q2: n = 139, -0.03(-0.18, 0.11)<br>Q3: n = 139, 0.01(-0.14, 0.16)<br>Q4: n = 139, 0.04(-0.11, 0.19)<br>LINE-1 methylation [ $\beta$ 95%CI] & plasma B12 (pmol/L), All $P_{trend}$ = 0.51:<br>Q1: n = 137, ref<br>Q2: n = 136, -0.04(-0.19, 0.11)<br>Q3: n = 134, 0.06(-0.22, 0.09)<br>Q4: n = 136, -0.12(-0.28, 0.04)                                                                                                                                                                                                                                                                                                                                                                                                                                                                                                                                                                                                | Sex, vitamin A, CRP, maternal BMI, household socioeconomic position              |

(Continued)

Table 2. (Continued)

| First author (year), country | Cohort, N (% female)                                              | Early life variable (mean age $\pm$ SD (age range))                                            | DNA methylation                                                                         | Tissue     | Mean age at epigenetic measure $\pm$ SD (age range) | Main result                                                                                                                                                                                                                                                                                                                                                                                                                                                                                                                                                                                                                                                                                                                                                                                                                                                                                                                                                                                                                                    | Confounders                                                                                                                                                                                                          |
|------------------------------|-------------------------------------------------------------------|------------------------------------------------------------------------------------------------|-----------------------------------------------------------------------------------------|------------|-----------------------------------------------------|------------------------------------------------------------------------------------------------------------------------------------------------------------------------------------------------------------------------------------------------------------------------------------------------------------------------------------------------------------------------------------------------------------------------------------------------------------------------------------------------------------------------------------------------------------------------------------------------------------------------------------------------------------------------------------------------------------------------------------------------------------------------------------------------------------------------------------------------------------------------------------------------------------------------------------------------------------------------------------------------------------------------------------------------|----------------------------------------------------------------------------------------------------------------------------------------------------------------------------------------------------------------------|
| Ba (2011), China [93]        | 99 (48)                                                           | B-vitamin biomarkers (96% GAD 37-41 w)                                                         | IGF2 2 promoters using methylation-specific PCR                                         | Cord blood | Birth (96% GAD 37-41 w)                             | LINE-1 methylation [95%CI] & serum zinc (umol/L).<br>All $P_{trend} = 0.60$ .<br>Q1: n = 140, ref.<br>Q2: n = 142, 0.014 (-0.14, 0.16)<br>Q3: n = 141, 0.07 (-0.08, 0.23)<br>Q4: n = 141, 0.02 (-0.14, 0.18)<br>Adjusted:<br>LINE-1 methylation [95%CI] & plasma ferritin (ug/L).<br>All $P_{trend} = 0.22$ .<br>Q1: n = 141, ref.<br>Q2: n = 139, -0.16 (-0.31, -0.01)<br>Q3: n = 143, -0.08 (-0.24, 0.07)<br>Q4: n = 141, -0.13 (-0.28, 0.03)<br>LINE-1 methylation [95%CI] & plasma vitamin A (umol/L).<br>All $P_{trend} = 0.006$ .<br><0.70b: ref.<br>0.70-1.05: -0.07 (-0.24, 0.10)<br>$\geq 1.050$ , -0.19 (-0.36, -0.02)                                                                                                                                                                                                                                                                                                                                                                                                               | Mother's age, maternal pregnancy BMI, weight gain during pregnancy, mother's highest education level, parity, supplementation intake during pregnancy, Newborn's birth weight and birth length, Newborn's sex and CA |
| Haggerty (2013), UK [81]     | 913 (46)                                                          | RBS folate (GAD: 39.5 (95%CI: 39.4, 39.6w))                                                    | IGF2 (4 CpGs), PEG3 (7 CpGs), SNRPN (15q11.4 CpGs) LINE-1 (4 CpGs) using pyrosequencing | Cord blood | Birth                                               | LINE-1 methylation:<br>cord RBC folate 100 nmol/L: $\beta = -0.08$ (-0.12, -0.03), $p = 0.001$<br>PEG-3 methylation:<br>cord RBC folate 100 nmol/L: $\beta = -0.11$ (-0.16, -0.05), $p < 0.001$<br>SNRPN methylation:<br>cord RBC folate 100 nmol/L: $\beta = -0.002$ (-0.09, 0.09), $p = 0.96$<br>IGF2 methylation:<br>cord RBC folate 100 nmol/L: $\beta = 0.11$ (0.02, 0.20), $p = 0.02$                                                                                                                                                                                                                                                                                                                                                                                                                                                                                                                                                                                                                                                    | Mother's age, maternal pregnancy BMI, weight gain during pregnancy, mother's highest education level, parity, supplementation intake during pregnancy, Newborn's birth weight and birth length, Newborn's sex and CA |
| Voisin (2015), Greece [99]   | Greek Healthy Growth Study, Obese: 35 (68) Normal weight: 34 (66) | 24-hour recall for %energy from fat, cholesterol intake, MUFA/SFA, PUFA/SFA & MUFA+PUFA (-10y) | Infinium Human Methylation27 BeadChip                                                   | Blood      | -10y                                                | The methylation levels of one CpG island shore and four sites were significantly correlated with total fat intake. No significance was found for cholesterol intake. The methylation levels of 2 islands, 11 island shores and 16 sites were significantly correlated with PUFA/SFA, of 9 islands, 26 island shores and 158 sites with MUFA/SFA; and of 10 islands, 40 island shores and 130 sites with (MUFA+PUFA)/SFA.<br>Top 10 most significant CpG sites/islands (Gene, Coefficient, adjusted $P$ ):<br><u>%Energy from fat</u><br>GPS3: -0.0135, $p = 0.006$<br>TAMM4F: 0.00987, $p = 0.006$<br>TAS2R13: -0.0118, $p = 0.012$<br>MZB1: 0.0145, $p = 0.023$<br>TXNIP: 0.0148, $p = 0.043$<br>MUFA/SFA:<br>ALDH3A2: -0.289, $p = 0.00097$<br>MYLK3: -0.238, $p = 0.00363$<br>LOC62852: -0.317, $p = 0.00364$<br>TPP2: -0.309, $p = 0.00364$<br>RXFP2: -0.262, $p = 0.00364$<br>TMEM80: -0.245, $p = 0.00364$<br>SEMA3G: 0.28, $p = 0.00388$<br>VCAM1: -0.259, $p = 0.00482$<br>KRT3: -0.245, $p = 0.00496$<br>KRTCAP2: -0.30, $p = 0.0051$ | Tanner stage, cell-type composition                                                                                                                                                                                  |

(Continued)

Table 2. (Continued)

| First author (year), country       | Cohort, N (% female)                                                                                                      | Early life variable (mean age ± SD (age range))                            | DNA methylation                                                                                                                                                                   | Tissue     | Mean age at epigenetic measure ± SD (age range)                                           | Main result                                                                                                                                                                                                                                                                                                                                                                                                                                                                                                                                                                                                                                                                                                                                                                                                                                                                                                                                                                                                                              | Confounders                                                                                                         |
|------------------------------------|---------------------------------------------------------------------------------------------------------------------------|----------------------------------------------------------------------------|-----------------------------------------------------------------------------------------------------------------------------------------------------------------------------------|------------|-------------------------------------------------------------------------------------------|------------------------------------------------------------------------------------------------------------------------------------------------------------------------------------------------------------------------------------------------------------------------------------------------------------------------------------------------------------------------------------------------------------------------------------------------------------------------------------------------------------------------------------------------------------------------------------------------------------------------------------------------------------------------------------------------------------------------------------------------------------------------------------------------------------------------------------------------------------------------------------------------------------------------------------------------------------------------------------------------------------------------------------------|---------------------------------------------------------------------------------------------------------------------|
| De La Rocha (2016), Mexico [100]   | 49 (55)                                                                                                                   | Serum fatty acids                                                          | Global DNA methylation using total 5-methyldeoxycytosine                                                                                                                          | Blood      | Lactating infant (89.6 ±68.2d)                                                            | <p>Change in %methylation per one% increase in FA</p> <p>serum C20:4 (arachidonic acid): <math>\beta = 0.08</math>, <math>p = 0.04</math></p> <p>serum C20:5 (eicosapentaenoic acid): <math>\beta = 0.099</math>, <math>p = 0.04</math></p> <p>No significant associations with other fatty acids (data not shown in main paper)</p>                                                                                                                                                                                                                                                                                                                                                                                                                                                                                                                                                                                                                                                                                                     | Age, birth weight, normalised weight gain                                                                           |
| Lee (2012), US [26]                | THREE; 141 (-47)                                                                                                          | Serum copper, (87% GAD $\geq 37$ w)                                        | NFIX, FAPCE, MSRB3 using pyrosequencing                                                                                                                                           | Cord blood | Birth                                                                                     | <p>Association (95% CI) with serum copper <math>\mu</math>g/dl in cord blood:</p> <p>NFIX: <math>\beta = 0.13</math> (0.06, 0.20)</p> <p>FAPCE: <math>\beta = -0.10</math> (-0.16, -0.05)</p> <p>MSRB3: <math>\beta = -0.15</math> (-0.21, -0.08)</p>                                                                                                                                                                                                                                                                                                                                                                                                                                                                                                                                                                                                                                                                                                                                                                                    | Batch effects                                                                                                       |
| <b>Famine / Seasonality</b>        |                                                                                                                           |                                                                            |                                                                                                                                                                                   |            |                                                                                           |                                                                                                                                                                                                                                                                                                                                                                                                                                                                                                                                                                                                                                                                                                                                                                                                                                                                                                                                                                                                                                          |                                                                                                                     |
| Tobi (2015), The Netherlands [101] | Dutch Hunger-Winter 885 (54) (Exposure during gestation: 348; Periconceptual 74; Time-controls: 160; Family-controls 303) | Famine                                                                     | Infinium HumanMethylation450 BeadChip                                                                                                                                             | Blood      | 58.9 ±5y                                                                                  | <p>Famine vs. time- and family controls: % methylation (95%CI)</p> <p>Famine in 1–10 weeks gestation (n = 73)</p> <p>cg10823026 (FAM150B/TMEM18): 2.3 (1.5–3.1), <math>p = 3.1 \times 10^{-8}</math></p> <p>cg10354880 (SLC38A2/970.50.9): <math>p = 5.9 \times 10^{-7}</math></p> <p>cg27370573 (PPAP2C): 2.7 (1.7, 3.7), <math>p = 3.6 \times 10^{-7}</math></p> <p>cg11496778 (OSBP15/MARGPRG): -2.3 (-3.1, -1.5), <math>p = 2.1 \times 10^{-7}</math></p> <p>Famine in 11–20 weeks gestation (n = 123): no significant cpGs</p> <p>Famine in 21–30 weeks gestation (n = 143): no significant cpGs</p> <p>Famine in 31–delivery (n = 128): no significant cpGs</p> <p>Any exposure to famine:</p> <p>cg15659713 (TACC1): 1.2 (0.8, 1.7), <math>p = 2.0 \times 10^{-7}</math></p> <p>cg6199857 (ZNF385A): 2.0 (1.5, 2.7), <math>p = 1.5 \times 10^{-7}</math></p> <p>Conceived during extreme famine, but exposed for short period in gestation:</p> <p>cg23989336 (TMEM105): 3.5 (-4.6, 2.3), <math>p = 1.0 \times 10^{-7}</math></p> | Age, sex, batch effects, cell heterogeneity, smoking status, current macronutrient and micronutrient intake and SEP |
| Finer (2016), Bangladesh [102]     | 143 (58)                                                                                                                  | Famine (postnatal exposure 1–2y or exposure during gestation or unexposed) | Infinium HumanMethylation450 BeadChip<br>16 MEs: VTRNA2-1, PAX8, PRDM9, HLA-DQB2, PLD6, ZFP57, AKAP12, ATP5B, LRRIC4B, SPC20, BOLA, RBM46, ZFYVE28, EXD3, PARD6G, ZNF678, ZFYVE28 | Blood      | Postnatal exposed: 31 ±0.4y<br>Exposure during gestation: 30 ±0.3y<br>Unexposed: 28 ±0.3y | <p>Postnatal exposure n = 49 vs gestational exposure n = 40 vs unexposed n = 54</p> <p>Genome-wide analyses</p> <p>No differences between groups at 5% FDR</p> <p>Targeted DNA methylation</p> <p>Methylation differences between groups seen in 6/16 MEs at <math>p &lt; 0.05</math>, driven by gestational exposure group: VTRNA2-1, PAX8, PRDM9, ZFP57, BOLA, EXD3</p> <p>z-score for mean methylation across all 16 MEs gestational exposure: -0.24</p> <p>postnatal exposure: -0.14</p> <p>unexposed: -0.15</p> <p>ANOVA <math>p = 0.0003</math></p>                                                                                                                                                                                                                                                                                                                                                                                                                                                                                | Cell composition                                                                                                    |

(Continued)

Table 2. (Continued)

| First author (year), country           | Cohort, N (% female)                                                                                     | Early life variable (mean age $\pm$ SD (age range)) | DNA methylation                                                                                                                                    | Tissue | Mean age at epigenetic measure $\pm$ SD (age range)                                                                                  | Main result                                                                                                                                                                                                                                                                                                                                                                                                                                                                                                                                                                                                                                                                                                                                                                                                                                                                                                                                                                                                                                                                                                                                | Confounders                               |
|----------------------------------------|----------------------------------------------------------------------------------------------------------|-----------------------------------------------------|----------------------------------------------------------------------------------------------------------------------------------------------------|--------|--------------------------------------------------------------------------------------------------------------------------------------|--------------------------------------------------------------------------------------------------------------------------------------------------------------------------------------------------------------------------------------------------------------------------------------------------------------------------------------------------------------------------------------------------------------------------------------------------------------------------------------------------------------------------------------------------------------------------------------------------------------------------------------------------------------------------------------------------------------------------------------------------------------------------------------------------------------------------------------------------------------------------------------------------------------------------------------------------------------------------------------------------------------------------------------------------------------------------------------------------------------------------------------------|-------------------------------------------|
| Lumley (2012), The Netherlands [103]   | Dutch Hunger Winter 947 (54) (Prenatal:350, Unexposed time controls:290, Unexposed same-sex sibling:307) | Famine                                              | LINE-1 & Sat-2 using pyrosequencing<br>Global methylation using LUMA                                                                               | Blood  | Prenatal exposure group: 58.9 $\pm$ 0.5y<br>Unexposed time controls: 58.5 $\pm$ 1.6y<br>Unexposed same-sex siblings: 57.3 $\pm$ 6.3y | Changes in DNA methylation (%units) in exposed vs. all non-exposed:<br>Global methylation:<br>Mean % (SD): 75.2% (4.7)<br>B:95% CI: -0.15 (-0.49, 0.81), p = 0.63<br>LINE-1 methylation % (SD):<br>Mean % (SD): 77.1% (2.5)<br>B:95% CI: -0.05 (-0.33, 0.22), p = 0.70<br>Sat2 methylation % (SD):<br>Mean % (SD): 122.2 (56.2)<br>B:95% CI: -0.51 (-7.38, 6.36), p = 0.88                                                                                                                                                                                                                                                                                                                                                                                                                                                                                                                                                                                                                                                                                                                                                                 | Age, within family clustering             |
| Heijmans (2008), The Netherlands [104] | Dutch Hunger Winter 244 (-54) (periconceptual:60, late gestation: 62, Unexposed same-sex sibling:122)    | Famine                                              | IGR2 DMR (5 CpGs) using mass spectrometry-based method                                                                                             | Blood  | Periconceptual group: 58.1 $\pm$ 0.35y<br>Late gestation group: 58.8 $\pm$ 0.4y<br>Controls: 57.1 $\pm$ 5.5y                         | Mean (SD) methylation in those periconceptually exposed to famine vs. non-exposed siblings:<br>Average: 0.488(0.047) vs. 0.515(0.055), p = 5.9x10 <sup>-5</sup><br>CpG1: 0.436(0.037) vs. 0.470(0.041), p = 1.5x10 <sup>-4</sup><br>CpG2 and 3: 0.451(0.033) vs. 0.473(0.055), p = 8.1x10 <sup>-3</sup><br>CpG4: 0.577(0.114) vs. 0.591(0.112), p = 0.41<br>CpG5: 0.491(0.061) vs. 0.529(0.066), p = 1.4x10 <sup>-3</sup><br>No difference in methylation of IGF2DMR between a subset exposed in late gestation and unexposed siblings                                                                                                                                                                                                                                                                                                                                                                                                                                                                                                                                                                                                     | Age and family relations                  |
| Tobi (2014), The Netherlands [105]     | Dutch Hunger Winter 48 (50)                                                                              | Famine (early gestation)                            | 1.2M CpGs using RRBS                                                                                                                               | Blood  | 58.1 $\pm$ 0.35y                                                                                                                     | Genomic annotation-centred analysis of differential methylation after famine (vs. unexposed sibling), P:9x10 <sup>-6</sup><br>Genomic annotations:<br>Non-CGI, 'bona fide' promoters: 0.026<br>Enhancers: 0.026<br>DNaseI/FAIRE-seq regions: 0.086<br>Middle exons: 0.036<br>Developmental enhancers type I: 0.036<br>'bona fide' CGI shores: 0.053<br>Non-coding RNA: 0.053<br>Conserved regions: 0.053<br>CGI shores: 0.053<br>3'UTR: 0.085<br>Non genic CGI: 0.085<br>'Bona fide' CGI border: 0.085<br>Developmental enhancer type II: 0.15<br>CGI: 0.15<br>Introns: 0.15<br>HESC bivalent chromatin domains: 0.28<br>Bona fide CGI: 0.32<br>Cell-type specific gene promoters: 0.32<br>First exons: 0.36<br>Promoters: 0.36<br>HSC bivalent chromatin domains: 0.36<br>Imprinted promoters: 0.36<br>'Bona fide' CGI promoter: 0.37<br>CTCF insulators from CD4+ cells: 0.37<br>Imprinted DMRs: 0.37<br>Putative metastable epialles: 0.47<br>Variably methylated regions: 0.57<br>Promoters cancer genes: 0.63<br>Within the 5 annotations found to be significant, 181 DMRs were associated with prenatal famine P:9x10 <sup>-6</sup> |                                           |
| Tobi (2009), the Netherlands [106]     | Dutch Hunger Winter 244 (-54) (periconceptual:60, late gestation:62, unexposed same-sex sibling:122)     | Famine                                              | GNASAS, GNAS, AIB, MEG3, KCNQ1OT1, INSIGF and GRB10, IGF2R, IL10, TNF, ABCA1, APOC1, LFTO, LEP, NR3C1 and CRH using mass-spectrometry based method | Blood  | Periconceptual group: 58.1 $\pm$ 0.35y<br>Late gestation group: 58.8 $\pm$ 0.4y<br>Controls: 57.1 $\pm$ 5.5y                         | Within-pair differences divided vs sibling controls, P:<br>Periconceptual exposure:<br>GNASAS: 0.24, 3.1x10 <sup>-6</sup><br>MEG3: 0.21, 8.0x10 <sup>-6</sup> (non-significant after Bonferroni correction)<br>IL10: 0.37, 1.8x10 <sup>-6</sup><br>ABCA1: 0.21, 8.2x10 <sup>-4</sup><br>LEP: 0.24, 2.9x10 <sup>-3</sup><br>INSIGF: -0.61, 2.3x10 <sup>-5</sup><br>Non-significant for all other loci<br>Late gestation exposure:<br>No associations except for reduction in GNASAS: -0.26, 1.1x10 <sup>-7</sup><br>Non-significant for all other loci                                                                                                                                                                                                                                                                                                                                                                                                                                                                                                                                                                                      | Family relatedness, bisulphite batch, age |

(Continued)



Table 2. (Continued)

| First author (year), country             | Cohort, N (% female)                                                                                  | Early life variable (mean age ± SD (age range)) | DNA methylation                                                     | Tissue | Mean age at epigenetic measure ± SD (age range)                              | Main result                                                                                                                                                                                                                                                                                                                                                                                                                                                                                                                                        | Confounders                  |
|------------------------------------------|-------------------------------------------------------------------------------------------------------|-------------------------------------------------|---------------------------------------------------------------------|--------|------------------------------------------------------------------------------|----------------------------------------------------------------------------------------------------------------------------------------------------------------------------------------------------------------------------------------------------------------------------------------------------------------------------------------------------------------------------------------------------------------------------------------------------------------------------------------------------------------------------------------------------|------------------------------|
| Veenendaal (2012), The Netherlands [107] | Dutch Hunger Winter 759 (54%) (periconceptional; late gestations; 62 unexposed same-sex sibling; 122) | Famine                                          | PPARγ, GR1-C, PFKfbase, LPL using PCR                               | Blood  | 58±1y                                                                        | Methylation differences % (95%CI) for exposed vs. unexposed:<br>Late gestation:<br>GR: 0.60 (-16.39, 21.05)<br>LPL: 11.01 (-5.35, 30.34)<br>PFKfbase: 6.18 (-42.25, 95.03)<br>PPARγ: -2.97 (-14.53, 11.52)<br>Mid-gestation<br>GR: -5.26 (-22.04, 15.14)<br>LPL: 12.08 (-5.45, 32.84)<br>PFKfbase: -32.36 (-64.33, 28.27)<br>PPARγ: -8.70 (-20.63, 5.02)<br>Early gestation:<br>GR: 6.82 (-15.55, 35.12)<br>LPL: 9.20 (-10.95, 34.04)<br>PFKfbase: -40.84 (-72.56, 27.38)<br>PPARγ: 6.76 (-21.08, 10.30)<br>No significant associations were found | Maternal age, sex and parity |
| Waterland (2010), The Gambia [108]       | The Kencha cohort 50 (50%)<br>Conceived in rainy season; 25 conceived in dry season; 25               | Famine                                          | MES: BOLA3, FIJ20433, PAX8, SLOTRK1<br>ZFYVE28 using pyrosequencing | Blood  | Conceived in rainy season; 6.61±2.73y<br>Conceived in dry season; 7.05±2.67y | At all 5 MES, DNA methylation was significantly higher among individuals conceived during the rainy season (i.e. hungry season):<br>BOLA3: p = 0.03<br>FIJ20433: p = 0.03<br>PAX8: p = 0.02<br>SLOTRK1: p = 0.006<br>ZFYVE28: p = 0.002<br>Overall: p = 0.0001<br>Effect sizes were NR but highlighted as being large e.g. rainy season was associated with absolute methylation increments of over 10% at PAX8 and ZFYVE28                                                                                                                        |                              |

\*Studies spanning more than one exposure may appear twice in the table;

\*\* Abstract

AA: Age acceleration; ARIES: Accessible Resource for Integrated Epigenomic Study; BMI: Body Mass Index; BSCC: Bogotá School Children Cohort; CHO: Carbohydrate; CI: Confidence Interval; CBMCs: Cord Blood Mononuclear Cells; COBRA: Combined Bisulfite Restriction Analysis; D: Days; DMR: Differentially Methylated Region; DA: Dizygotic; FDR: False discovery rate; FFQ: Food frequency Questionnaire; GAD: Gestational Age at Delivery; HUVEC: Human Umbilical Vein Endothelial Cells; LUMA: Luminometric methylation assay; M: Months; MANOE: Maternal Nutrition and Offspring's Epigenome Study; MoBA: Norwegian Moher and Child Cohort Study; MUFA: Monounsaturated fatty acid; MZ: Monozygotic; NEST: Newborn Epigenetics Study; NR: Not Reported; OR: Odds Ratio; PAH: Princess Anne Hospital Study; PETS: Peri/postnatal Epigenetic Twins Study PUFA: Polyunsaturated fatty acid; RBC: Red Blood Cell; SD: Standard Deviation; SE: Standard Error; SEP: Socioeconomic Position; SFA: Saturated Fatty Acid; THREE: Tracking Health Related to Environmental Exposures Study; W; Weeks Y: Year

<https://doi.org/10.1371/journal.pone.0201672.t002>

**Table 3. Socioeconomic position in early life and epigenetics. (Organised by exposure, DNA methylation (epigenome wide, global methylation, imprinted genes, other genes).**

|                            | Cohort, N (% female) | Early life variable                                                  | DNA methylation                                                              | Tissue             | Mean age at epigenetic measure $\pm$ SD (age range) | Main result                                                                                                                                                                                                                                                                                                                                                                                                                                                                                                                                                                                                                                                                                                       | Confounders                                                                                                                                                                        |
|----------------------------|----------------------|----------------------------------------------------------------------|------------------------------------------------------------------------------|--------------------|-----------------------------------------------------|-------------------------------------------------------------------------------------------------------------------------------------------------------------------------------------------------------------------------------------------------------------------------------------------------------------------------------------------------------------------------------------------------------------------------------------------------------------------------------------------------------------------------------------------------------------------------------------------------------------------------------------------------------------------------------------------------------------------|------------------------------------------------------------------------------------------------------------------------------------------------------------------------------------|
| Simpkin (2015), UK [50]    | AIRIS 1018 (51)      | Maternal education                                                   | Infinium Human MethylationEP0 BeadChip to estimate Horvath epigenetic age    | Cord blood & blood | Birth, 7y, 17y                                      | ANOVA F-statistic & p for early life variable and age acceleration:<br>Maternal education & AA at birth: 0.55, $p = 0.70$<br>Maternal education & AA at 7 years: 0.37, $p = 0.83$<br>Maternal education & AA at 17 years: 1.40, $p = 0.23$<br>Longitudinal analysis of maternal education and average AA during childhood<br>CSE: ref<br>Voc: -0.30 (-1.84, 1.23)<br>O-level: -0.24 (-1.56, 1.08)<br>A-level: -0.38 (-1.69, 0.93)<br>Degree: -0.51 (-1.87, 0.85)<br>$p = 0.76$<br>Longitudinal analysis of maternal education and changes in AA during childhood<br>CSE: ref<br>Voc: 0.11 (-0.02, 0.24)<br>O-level: 0.38 (-0.07, 0.15)<br>A-level: 0.58 (-0.05, 0.17)<br>Degree: 0.10 (-0.01, 0.22)<br>$p = 0.18$ | Cell-type proportions                                                                                                                                                              |
| Herbstman (2013), US [27]  | CCCEH 279 (53.4)     | Maternal education & maternal hardship (last trimester of pregnancy) | Global methylation using Methylamp Global DNA Methylation Quantification Kit | Cord blood & blood | Birth & ~3y                                         | Maternal education & cord blood global methylation:<br><u>high school vs. no high school: <math>\beta = 0.10</math> (-0.29, 0.50)</u><br><u>higher education vs. no high school: <math>\beta = 0.09</math> (-0.33, 0.51)</u><br>Maternal hardship (yes vs no) & cord blood global methylation:<br>$\beta = 0.09$ (-0.23, 0.42)<br>Maternal education & 3y blood global methylation:<br><u>high school vs. no high school: <math>\beta = 0.03</math> (-0.41, 0.48)</u><br><u>higher education vs. no high school: <math>\beta = -0.28</math> (-0.80, 0.23)</u><br>Maternal hardship (yes vs no) & 3y global methylation:<br>$\beta = -0.19$ (-0.58, 0.42)                                                          | GA, plate, maternal height, pre-pregnancy BMI, maternal age at delivery, ethnicity, sex, public assistance, total polycyclic aromatic hydrocarbons and environmental tobacco smoke |
| Peng (2012), Columbia [50] | BSCC 568 (53.7)      | Maternal education, household socioeconomic stratum                  | LINE-1 using pyrosequencing                                                  | Blood              | (5-12y)                                             | LINE-1 methylation mean (SD)<br>Maternal education (university):<br>All: 80.39 (0.70), $P_{trend} = 0.34$<br>Males: 80.71 (0.56), $P_{trend} = 0.06$<br>Females: 80.13 (0.72), $P_{trend} = 0.78$<br>Household socioeconomic stratum:<br>All:<br>1 (lowest): 80.35 (0.48)<br>2: 80.20 (0.67)<br>3: 80.21 (0.64)<br>4 (highest): 80.62 (0.71)<br>$P_{trend} = 0.15$<br>Males:<br>1 (lowest): 80.40 (0.55)<br>2: 80.35 (0.68)<br>3: 80.32 (0.64)<br>4 (highest): 80.62 (0.61)<br>$P_{trend} = 0.30$<br>Females:<br>1 (lowest): 80.29 (0.38)<br>2: 80.06 (0.63)<br>3: 80.13 (0.64)<br>4 (highest): 80.62 (0.89)<br>$P_{trend} = 0.27$                                                                                |                                                                                                                                                                                    |

(Continued)

Table 3. (Continued)

|                                               | Cohort, N (% female)                    | Early life variable                        | DNA methylation                                    | Tissue     | Mean age at epigenetic measure $\pm$ SD (age range) | Main result                                                                                                                                                                                                                                                                                                                                                                                                                                                                                                                                                                                                                                                                                                                                                                                                                                                                                                                                                                                                                                                                                                                                                                                                                                                                                                                                  | Confounders                                                               |
|-----------------------------------------------|-----------------------------------------|--------------------------------------------|----------------------------------------------------|------------|-----------------------------------------------------|----------------------------------------------------------------------------------------------------------------------------------------------------------------------------------------------------------------------------------------------------------------------------------------------------------------------------------------------------------------------------------------------------------------------------------------------------------------------------------------------------------------------------------------------------------------------------------------------------------------------------------------------------------------------------------------------------------------------------------------------------------------------------------------------------------------------------------------------------------------------------------------------------------------------------------------------------------------------------------------------------------------------------------------------------------------------------------------------------------------------------------------------------------------------------------------------------------------------------------------------------------------------------------------------------------------------------------------------|---------------------------------------------------------------------------|
| Tehraniifar (2013), US [113]                  | New York Women's birth cohort, 90 (100) | Mother's education, family income at birth | Sat2, Alu, LINE-1 using MethylLight                | Blood      | 38–46y                                              | <p>Univariate analysis, methylation mean (95% CI)</p> <p>Sat2, <math>n = 87</math></p> <p>&lt;high school: 92.5(83.6, 101.3)</p> <p><math>\geq</math>high school: 76.1 (67.6, 84.7)</p> <p><math>P &lt; 0.05</math></p> <p>Income Q1 (lowest): 97.0(83.6, 110.3)</p> <p>2: 78.8 (66.4, 91.1)</p> <p>3: 83.2 (70.8, 95.6)</p> <p>4: 72.9 (60.2, 85.6)</p> <p><math>P &lt; 0.10</math></p> <p>Alu, <math>n = 88</math></p> <p>&lt;high school: 108.8(97.4, 120.2)</p> <p><math>\geq</math>high school: 105.8(94.4, 117.3)</p> <p><math>P &gt; 0.05</math> Income Q1 (lowest): 107.9(89.9, 125.8)</p> <p>2: 110.9 (93.4, 128.4)</p> <p>3: 103.4 (86.6, 120.5)</p> <p>4: 112.3 (95.2, 129.4)</p> <p><math>P &gt; 0.05</math></p> <p>LINE-1, <math>n = 89</math></p> <p>&lt;high school: 167.2 (150.7, 183.8)</p> <p><math>\geq</math>high school: 162.8 (146.5, 179.2)</p> <p><math>P &gt; 0.05</math></p> <p>Income Q1 (lowest): 170.7(145.6, 195.9)</p> <p>2: 163.4(139.5, 187.3)</p> <p>3: 155.3(131.4, 179.2)</p> <p>4: 177.2(153.3, 201.1)</p> <p><math>P &gt; 0.05</math></p> <p>Multivariate association in Sat2 beta(95%CI), <math>n = 73</math></p> <p>Maternal education: 3.4(-1.6, 18.4)</p> <p>Lowest vs. highest Q: 22.5 (0.8, 44.1)</p> <p>Second vs. highest Q: 3.0(-16.9, 22.9)</p> <p>Third vs. highest Q: 6.7(-11.3, 24.8)</p> | Age, prenatal smoke, birth order, adult education, adult occupation       |
| King (2015), US [114]                         | NEST, 619 (NR)                          | Maternal education & income                | DMRs in IGF2, H19, MEG3, NNAT using pyrosequencing | Cord blood | Birth                                               | <p>Maternal education, unstandardized <math>\beta</math>, <math>p</math>, ref = 1y:</p> <p>IGF2:</p> <p>1-12y: -1.58, <math>P &lt; 0.05</math>, <math>P &lt; 0.1</math></p> <p>13-15y: -2.10, <math>P &lt; 0.05</math></p> <p>17+ y: -1.74, <math>P &lt; 0.05</math></p> <p>H19:</p> <p>1-12y: -1.16, NS</p> <p>13-15y: -0.47, NS</p> <p>17+ y: -0.57, NS</p> <p>MEG3:</p> <p>1-12y: 0.53, NS</p> <p>13-15y: -0.05, NS</p> <p>17+ y: -0.70, NS</p> <p>NNAT:</p> <p>1-12y: -1.27, NS</p> <p>13-15y: -1.13, NS</p> <p>17+ y: -0.28, NS</p> <p>Household income, unstandardized <math>\beta</math>, <math>p</math>, ref = \$100K</p> <p>IGF2:</p> <p>\$25k-1.19, NS</p> <p>\$25-\$50k: -1.87, <math>P &lt; 0.1</math></p> <p>\$50-\$100k: -0.89, NS</p> <p>H19:</p> <p>\$25k-1.07, NS</p> <p>\$25-\$50k: -1.10, NS</p> <p>\$50-\$100k: -0.94, NS</p> <p>MEG3:</p> <p>\$25k-0.94, NS</p> <p>\$25-\$50k: -0.85, NS</p> <p>\$50-\$100k: 0.49, NS</p> <p>NNAT:</p> <p>\$25k-1.37, NS</p> <p>\$25-\$50k: 0.96, NS</p> <p>\$50-\$100k: 1.78, NS</p>                                                                                                                                                                                                                                                                                                   | Mother and father's race, household income/education                      |
| Oelermann-Borst (2012), The Netherlands [115] | HAVEN 120 (42)                          | Maternal education                         | IGF2 DMR, IGF2R, INSIGF using PCR                  | Blood      | 17±2.5m                                             | <p><math>\beta</math>(SE) for change in methylation from linear mixed model</p> <p>IGF2 DMR: -0.3(0.9), <math>p = 0.71</math></p> <p>IGF2R: 2.4(1.5), <math>p = 0.11</math></p> <p>INSIGF: 1.4(0.6), <math>p = 0.02</math></p>                                                                                                                                                                                                                                                                                                                                                                                                                                                                                                                                                                                                                                                                                                                                                                                                                                                                                                                                                                                                                                                                                                               | Correlation between individual CpG dinucleotides, bsulfite batch, smoking |

(Continued)

Table 3. (Continued)

|                                                    | Cohort, N (% female)                            | Early life variable                                                    | DNA methylation                                             | Tissue                                                    | Mean age at epigenetic measure $\pm$ SD (age range) | Main result                                                                                                                                                                                                                                                                                                | Confounders                                                                                                                                                                                                            |
|----------------------------------------------------|-------------------------------------------------|------------------------------------------------------------------------|-------------------------------------------------------------|-----------------------------------------------------------|-----------------------------------------------------|------------------------------------------------------------------------------------------------------------------------------------------------------------------------------------------------------------------------------------------------------------------------------------------------------------|------------------------------------------------------------------------------------------------------------------------------------------------------------------------------------------------------------------------|
| Soubry (2011), US [38]                             | NEST, 436 (47.5)                                | Maternal education                                                     | IGF2 DMR (3 CpGs) and H19 DMR (4 CpGs) using pyrosequencing | Cord blood                                                | Birth                                               | Mean methylation % (SD), difference (p)<br>IGF2:<br>College yes: 46.99 (6.61)<br>College no: 47.72 (7.04)<br>$\Delta$ : -0.73 (0.34)<br>H19:<br>College yes: 58.90 (7.45)<br>College no: 60.73 (8.07)<br>$\Delta$ : -1.83 (0.03)                                                                           |                                                                                                                                                                                                                        |
| Obermann-Borst (2013), The Netherlands [64]        | 120 (42)                                        | Maternal education                                                     | LEP using mass-spectrometry based method                    | Blood                                                     | 17 $\pm$ 2.5m                                       | % Absolute methylation change (SE) & % Relative methylation change (SE) from linear mixed model<br>Model 1<br>low education: 2.1 (0.8); +9.1 (3.5), $p$ = 0.008<br>Model 2<br>low education: +1.0 (0.8); +4.2 (3.4), $p$ = 0.23                                                                            | Model 1 Correlation between individual CpG dinucleotides, bisulfite batch, GA<br>Model 2 Correlation between individual CpG dinucleotides, bisulfite batch, smoking, breastfeeding, sex, birthweight, BMI serum leptin |
| Wijanda (2015), UK [68]                            | 120 (41.7)                                      | Mother's education                                                     | LEP & TNF $\alpha$ using mass-spectrometry based method     | Blood                                                     | 17 $\pm$ 2.5m                                       | TNF $\alpha$ & LEP methylation were not associated with maternal education                                                                                                                                                                                                                                 |                                                                                                                                                                                                                        |
| Mulligan (2012), Democratic Republic of Congo [45] | 25 (NR)                                         | Maternal deprivation                                                   | NR3C1 (39 CpGs) using PCR                                   | Cord blood                                                | Birth                                               | First FC of % methylation of 39 CpG sites explained 16.15% of variance & correlated with maternal deprivation $r$ = 0.44, $p$ = 0.03                                                                                                                                                                       |                                                                                                                                                                                                                        |
| Agha (2014), US [116]                              | New England Family Study birth cohort, 106 (64) | Parental SEP                                                           | Infinium Human Methylation450 BeadChip                      | Subcutaneous adipose tissue & peripheral blood leukocytes | 44-50y                                              | Adipose tissue<br>Parental SEP was associated with DNA methylation in women ( $p$ < 0.001), but not men or the pooled sample.<br>Blood<br>Parental SEP was not related to blood DNA methylation                                                                                                            | Race, smoking, mother's smoking during pregnancy                                                                                                                                                                       |
| Terry (2008), US [60]                              | 92 (100)                                        | Family SES (measured by parental education and income at birth and 7y) | Global DNA methylation using (3H)-methyl acceptance assay   | Blood                                                     | 42.28y                                              | Multivariate linear regression DPM/ $\mu$ g(95% CI) for association between DNA methylation by variables<br>Family SES: -0.01 (-0.01, 0.002)                                                                                                                                                               | Smoke exposure, adult BMI, race, birth weight, age at menarche, childhood passive smoking, parity, age at first birth                                                                                                  |
| Beach (2016), US [117]                             | 398 (55)                                        | Preadolescent cumulative SEP risk (11.7y)                              | Infinium Human Methylation450 BeadChip                      | Blood                                                     | 19.3y                                               | 28,640 loci were associated at the $p$ < 0.01 level of significance, with 2,032 loci associated at FDR < 0.05. No specific loci presented                                                                                                                                                                  | Sex, age                                                                                                                                                                                                               |
| Lam (2012), Canada [118]                           | 92 (62)                                         | Early life SES                                                         | Infinium Human Methylation27BeadChip                        | Blood                                                     | 33.04 $\pm$ 5.03y                                   | 3 differentially methylated CpGs (<5% change were found comparing low SES $n$ = 46) with high SES ( $n$ = 46). Individual effect estimates NR                                                                                                                                                              |                                                                                                                                                                                                                        |
| Borghol (2011), UK [119]                           | 1958 British Birth cohort 4000                  | Cumulative SEP Index                                                   | Genome-wide methylation (MeDIP)                             | Blood                                                     | 45y                                                 | 3112 probes (6176 genes) were variably methylated when comparing SEP extremes.<br>Unsupervised hierarchical cluster was applied to the 500 most variables probes. A large cluster was found to be enriched with high SEP individuals.<br>1252 gene promoters associated with childhood SEP were identified |                                                                                                                                                                                                                        |
| Subramanyam (2013), US [120]                       | MESA 988 (52)                                   | Childhood SES                                                          | LINE-1 and Alu using pyrosequencing                         | Blood                                                     | 44-84y                                              | Mean difference (SE) in DNA methylation per category change in exposure (low, medium, high)<br>LINE-1: 0.04(0.06), $P$ > 0.05<br>Alu: 0.02(0.05), $P$ > 0.05                                                                                                                                               | Age, sex, race                                                                                                                                                                                                         |

(Continued)

Table 3. (Continued)

|                        | Cohort, N (% female) | Early life variable                     | DNA methylation                                                        | Tissue | Mean age at epigenetic measure $\pm$ SD (age range) | Main result                                                                                                                                                                                                                                                                                                                                                                                                                                                                                                                                                                                                                                                                                                                                                             | Confounders |
|------------------------|----------------------|-----------------------------------------|------------------------------------------------------------------------|--------|-----------------------------------------------------|-------------------------------------------------------------------------------------------------------------------------------------------------------------------------------------------------------------------------------------------------------------------------------------------------------------------------------------------------------------------------------------------------------------------------------------------------------------------------------------------------------------------------------------------------------------------------------------------------------------------------------------------------------------------------------------------------------------------------------------------------------------------------|-------------|
| Beech (2014), US [121] | 388 (55)             | Preadolescent cumulative SEP risk 11.7y | SLC6A4 (16 CpGs) measured using Infinium Human Methylation450 BeadChip | Blood  | 10.3y                                               | <p>P from two-way ANOVA. * indicated significant after multiple testing</p> <p>cg12074493 <math>p = 0.588</math></p> <p>cg068841846 <math>p = 0.198</math></p> <p>cg185841905 <math>p = 0.494</math></p> <p>cg27569822 <math>p = 0.816</math></p> <p>cg10901908 <math>p = 0.241</math></p> <p>cg26741280 <math>p = 0.138</math></p> <p>cg25725890 <math>p = 0.500</math></p> <p>cg05016953 <math>p = 0.922</math></p> <p>cg14692377 <math>p = 0.001^{**}</math></p> <p>cg03363743 <math>p = 0.322</math></p> <p>cg25584138 <math>p = 0.502</math></p> <p>cg09591817 <math>p = 0.555</math></p> <p>cg26126367 <math>p = 0.139</math></p> <p>cg01330016 <math>p = 0.032</math></p> <p>cg24984698 <math>p = 0.006^{**}</math></p> <p>cg20592995 <math>p = 0.640</math></p> |             |

\*\* Abstract;

AA: Age acceleration; ARIES: Accessible Resource for Integrated Epigenomic Study; BSCC: Bogotá School Children Cohort; CCCEH: The Northern Manhattan Mothers and Newborns Study of the Columbia Center for Children's Environmental Health; DMR: Differentially Methylated Region; DPM: Disintegrations Per Minute; M: Months; MeDIP: Methylated DNA Immunoprecipitation; MESA: The Multi-Ethnic Study of Atherosclerosis; NEST: Newborn Epigenetics Study; NR: Not reported; PC: Principle Component; SEI: Socioeconomic Index; SEP: Socioeconomic Position; SES: Socioeconomic Status; Y: Years

<https://doi.org/10.1371/journal.pone.0201672.t003>

months [62]. In relation to non-imprinted genes, birth weight was found to be associated with methylation at *HSD2*, but not *GR* (both related to glucocorticoid) in blood samples of 34 participants aged 40 years [61] while another study found it not to be associated with methylation at the *LEP* gene in blood among infants aged ~17 months once confounders were taken into account [64].

Among the papers comparing extreme groups, one found no genome-wide differences in DNA methylation in adipose derived stem cells between 13 low birth weight (LBW) babies and controls [56]. Another found some evidence for a difference in methylation in specific CpG sites of *IGF2* in blood between 158 very LBW ( $\leq 1500\text{g}$ ) with controls [63]. The third paper found that methylation at two out of three CpG sites in *ACE* (angiotensin-converting enzyme, a gene related to cardiovascular disease) was lower among LBW children (6-12y) compared with normal birth weight children [79].

**Childhood body size and growth:** Using data from the ARIES cohort weak, associations between taller height at 7 years and epigenetic age acceleration at 7 and 17 years ( $p = 0.06$ ,  $p = 0.07$ ) were observed. However, no associations were seen with BMI [58].

Two papers examined growth in early life in relation to DNA methylation [59, 67]. In one, catch up growth during the first year of life was associated with Alu but not LINE-1 methylation measured in blood at 20 years [59]. In the other, those defined as rapid growers between term and 12 weeks had higher methylation at *TACSTD2* (associated with adiposity) at 12 years compared with slow growers. This was not replicated in ALSPAC where methylation was measured at 7 years [67].

#### **Cross-sectional studies of body size and growth in early life and DNA methylation.**

Most ( $n = 28$ ) of the cross-sectional papers investigated the association between birth weight and cord blood DNA methylation (Table 1). Five included birth length/head circumference/crown heel length [27, 43, 80–82], one body composition at birth [82], and six childhood height/weight [49, 50, 52–54, 83].

**Birth weight:** Five papers examined birth weight and cord blood genome-wide methylation measured using the Illumina Human-Methylation450 or Human-Methylation27 BeadChip array [21, 22, 24, 25, 55]. In a Norwegian study, birth weight was associated with methylation at 19 CpG sites including CpGs on the *ARID5B* and *XRCC3* genes which are related to adipogenesis and DNA repair respectively [21]. Birth weight percentile also related to methylation in three genes of which one, *FGFR2* (involved in metabolic regulation) replicated in a cohort of 110 participants [22]. Fryer *et al.* observed 304 CpG sites to be associated with birth weight percentile in 12 newborns [25]. However no genome-wide significance between birth weight and cord blood methylation was found among 201 participants of another study [24]. Using a different microarray technique, Lee *et al.* found birth weight to be associated with differentially methylated regions (DMRs) near three genes involved in early development (*NFIX*, *RAPGEF2*, *MSRB3*) [26].

Six papers examined markers of global methylation in cord blood [27–30, 32, 84]. There was no evidence for an association between birth weight and cord blood global methylation measured using Methylamp, LUMA, LINE-1 or Alu in most papers [27, 28, 32, 84]. One paper observed an association ( $p = 0.05$ ) between lower birth weight and higher cord blood LINE-1 methylation, [29] while others found that LINE-1 methylation was slightly lower among newborns with high birth weight compared with normal weight [30].

The remaining papers examined cord blood methylation in candidate genes with the majority focused on imprinted genes. Five reported associations with cord blood methylation at imprinted genes in the Newborn Epigenetics Study (NEST) [35–38, 40]. Most did not demonstrate an association between birth weight and *IGF2* methylation [35, 36, 38]. However, one observed a lower methylation at *IGF2* DMRs among low birth weight compared with normal

weight newborns ( $p = 0.06$ ) [37]. There was a significant relationship between birth weight and methylation at *PEG10* and/or *PLAGL1* in three NEST papers [35, 37, 40]. Findings for *H19* methylation were inconsistent [35, 36, 38]. In another study, methylation at *IGF2* was lower in high birth weight newborns compared with normal birth weight groups [39]. There was no correlation between birth weight and methylation at the *ZAC1* DMR [43] or with methylation of *IGF2*, *H19*, *PEG3*, *SNRPN* [29, 32].

In the papers investigating non-imprinted genes, birth weight was not associated with methylation in genes related to the glucocorticoid receptor [32, 46]. A follow on study from the paper by Fryer *et al.* [25], found that increased cord blood methylation at *GSTM5* and *MAP2K3* was associated with a reduced risk of a lower birth weight percentile while higher methylation levels in *APOB* were associated with an increased risk [45]. Birth weight was also associated with *AHRR* (involved in cell growth and differentiation), *HFI3A* (obesity-associated gene) and *LEP* (appetite-related) methylation [44, 47, 48].

Among the papers comparing extreme groups, Qian *et al.* did see differences in the methylation of *H19*, but not *MEST*, in cord blood between 39 small-for-GA (SGA) versus average-for-GA (AGA) babies [34]. Similarly, Zhang *et al.* found methylation at *H19* DMR in blood to be different between AGA, SGA and large-for-GA infants [41].

Other body size measures at birth: There was no evidence for an association between birth length, ponderal index, head circumference, crown heel length and global cord blood methylation [27–29, 43, 47], at imprinted genes [29, 43] or *HIF3A* [47].

Among 991 participants of Chinese, Malay or Indian ethnicity, subscapular skinfold thickness and subscapular:triceps skinfold thickness increased with increasing methylation at 2 CpG sites in *HIF3A* [47].

Childhood height/weight: In school age children (5–12y) in Columbia ( $n = 568$ ), there was no association between global blood DNA methylation and height-for-age z-score [50]. Methylation in 4 out of 8 CpG sites at the P2 promoter region of *IGF1* was inversely correlated with height in both a discovery and replication cohort [52]. There was no difference in the methylation of *H19* DMR comparing overweight versus lean boys or girls aged ~8 years [53]. Among 64 African-American children (5–6y), there was a weak association between lower BMI percentiles and higher saliva methylation in *DNMT3B*, but no relationships with other obesity-related genes (*FTO*, *MAOA*, *SH2B1*, *LEPR*, *BDNF* or *CCKAR*) [54]. Ouni *et al.* identified differently methylated CpG sites in *IGF* promoters between 94 children (~10y) with idiopathic short stature compared to children of normal height [51].

**TWIN-studies of body size and growth in early life and DNA methylation.** All twin studies examined birth-weight discordance [68–76]. There were no genome-wide DNAm differences between birth weight-discordant monozygotic (MZ) twins in blood from adults in two papers [68, 69], or using saliva samples from 15 year olds in another [71]. In twin participants aged 22–45 years, although 45 differentially methylated CpGs were identified using saliva samples, there was no difference in the methylation of repetitive elements [75]. In Twin-sUK, one CpG of *IGF1* was associated with birth weight discordance [70] while there was a 13% average difference in methylation of *COMT* (implicated in psychiatric disorders) between MZ twins at 5 years [76].

## Nutrition in early life

Thirty seven papers included in this systematic review examined the role of nutrition in early life (Table 2). The majority of these studies (37%,  $n = 14$ ) investigated maternal nutrition during pregnancy as a proxy for fetal nutrition. Nine studies examined nutrition in early life and six studies looked at both maternal pregnancy and early life nutrition. We also included eight

studies that examined the impact of gestational exposure to famine or periods of restricted dietary intake

**Maternal nutrition during pregnancy and offspring DNA methylation.** Most papers focused on the nutrients involved in one-carbon metabolism i.e. folate, vitamin B6, vitamin B12, methionine, choline, and betaine given their role as methyl donors [14].

Nutrition-related methyl donor intake and/or supplementation: Joubert *et al.* identified 443 CpG sites, measured on the Illumina Human-Methylation450 BeadChip, that were differentially methylated in cord blood in relation to maternal plasma folate [85]. No association was observed in three of the four papers which examined maternal nutrition-related methyl donor intake/folic acid supplementation in relation with infant cord blood global DNA methylation [81, 86–88]. The fourth paper found an inverse association between folic acid supplementation after 12 weeks gestation and LINE-1 methylation [81].

Six papers examined imprinted genes. Hoyo *et al.* found no differences in cord blood *IGF2* methylation among infants born to women taking moderate to high ( $\geq 400 \mu\text{g}/\text{d}$ ) folic acid supplements before or during pregnancy compared to non-users, however *H19* methylation was reduced [90]. While Loke *et al.* also observed a reduction in infant's *H19* methylation, they found an increase in one *IGF2* DMR (DMR2) across different tissues for mothers taking folic acid [91]. Similarly mean blood *IGF2* methylation of 17 month old infants was higher in those whose mothers took folic acid [62]. Another paper found that methylation at *ZAC1* was positively correlated with maternal intakes of vitamin B2 prior to pregnancy, however no association was observed for any other B-vitamin intake or folic acid supplement [64].

Two papers considered the effect at other candidate genes. In one, a difference in cord blood methylation at *LEP*, *RXRA* and/or *DNMT1* was observed for the intake of certain methyl donors [87]. However there was no association between maternal folic acid supplementation and blood *LEP* methylation among 17 month old infants in the other [64].

Nutrition-related methyl donor biomarker: In the paper by Haggarty *et al.*, maternal red blood cell (RBC) folate was inversely associated with LINE-1 methylation [81]. Similarly, another paper observed that maternal serum markers of vitamin B12 were correlated with cord blood global DNA methylation [89]. Results from four papers examining maternal methyl donor biomarkers in relation to offspring's cord blood methylation at imprinted genes were inconsistent [35, 93, 94]. In the Gambian Keneba cohort, serum vitamin B2, vitamin B6, homocysteine, and cysteine were associated with methylation at the combined metastable epialleles (MEs i.e. alleles that are variably expressed in genetically identical individuals due to epigenetic modifications [109])) [95].

Other nutrient intake/biomarker: Four papers investigated the effect of maternal intake of other nutrients. One found no association of maternal intake of protein, fat or carbohydrate with LINE-1 or Alu methylation [59]. Findings from the Motherwell cohort suggest that higher maternal intake of meat/fish and vegetable and lower intake of bread/potato in late pregnancy is associated with methylation at *HSD2* and *GR* in adult offspring blood [61], while another observed that lower maternal carbohydrate intake, but not fat or protein, was associated with higher cord blood methylation of *RXRA* but not of *eNOS* [96]. Finally, Simpkin *et al.* observed an association with maternal serum selenium, but not vitamin D, in children ages 7 and 17 years [58].

**Early life nutrition and offspring DNA methylation.** Breastfeeding: Five papers examined the impact of breastfeeding on DNA methylation. In Simpkin *et al.*'s epigenetic age paper there was no correlation with breastfeeding duration [58]. In secondary analyses in another paper there was an implied association between breastfeeding and DNA methylation at approximately 11 years as measured on the Illumina Human-Methylation27 BeadChip, however no statistical test was performed [97]. In two papers using the same sample of 17 month



old infants, there was a reduction in blood methylation of *LEP* with increasing duration of breastfeeding [64, 98]. A correlation between breastfeeding and methylation of a cancer-related gene, *CDKN2A*, in tumour tissues among premenopausal but not postmenopausal women was observed in the final paper [65].

**Nutrition-related methyl donor biomarker:**Seven papers examined the role of early life nutrition-related methyl donor biomarkers [25, 31, 50, 81, 88, 89, 93]. Across three cross-sectional papers, plasma homocysteine concentrations were negatively correlated with cord blood LINE-1 methylation or were different between two clusters defined by unsupervised hierarchical clustering using data from the Illumina Human-Methylation27 BeadChip [25, 31, 88]. In the Haggarty *et al.* paper described above, authors also observed that RBC folate in cord blood was associated with cord blood LINE-1, and methylation in *IGF2*, *PEG-3* but not *SNRPN* [81]. However, serum folate/plasma B12 was not cross-sectionally associated with cord blood LINE-1 methylation or blood samples of 5–12 year olds in two studies [50, 88]. While a negative cross-sectional correlation between serum B12 and *IGF2* cord blood methylation was observed in one study [89], this was not replicated by Ba *et al.*, who also found no correlation with folate [93].

**Other nutrient intake/biomarker:**One paper found that fatty acid intake was associated with methylation levels in children's blood as measured by from Illumina Human-Methylation27 BeadChip [99]. Another observed an association between HDL-cholesterol, but not LDL-cholesterol, and blood methylation at *LEP* and *TNF $\alpha$*  among young children. However this was attenuated after Bonferroni correction [98]

Two cross-sectional studies examined the effect of other early life nutrient biomarkers. One observed an association with arachidonic acid and eicosapentaenoic acid, but not other fatty acids in lactating infants global blood methylation [100]. The other paper reported an association between serum copper and *NFIX* but not *FAPGE* or *MSRB3* cord blood methylation [26].

**Famine/rainy season exposure and offspring DNA methylation.** The Dutch Hunger Winter, which lasted from September 1944 to May 1945, was the setting for 75% of the famine papers [104, 106, 107, 110–112]. In these papers DNA methylation was measured in blood samples of adults with mean age of 59 (0.5 SD) years who were exposed to famine at some point during gestation and compared with time and/or family matched controls. Using the Illumina Human-Methylation450 BeadChip, famine exposure during gestational weeks 1–10, but not later, was associated with differences in DNA methylation [105]. This time-sensitive association was also seen for *IGF2* methylation [104], and in an investigation of 15 candidate genes that are involved in metabolism, CVD and growth [106]. However, one study did not find an association between famine exposure at any point in gestation and DNA methylation at genes involved in stress response, developmental process and lipid metabolism [107].

Two papers were from other settings. In a sample of children in rural Gambia, methylation at MEs was higher among children conceived during the rainy season (i.e. "hungry" period) compared with those conceived in the dry season [108]. In Bangladeshi young adults no genome-wide differences in methylation was observed between those postnatally exposed to famine, exposed during gestation or unexposed [102]. However, a difference in methylation at MEs between those exposed to famine during gestation compared to the other groups was found [102].

## Socioeconomic position in early life

17 papers investigated the association between markers of SEP and DNA methylation (Table 3).

**Maternal education:** There was no association between maternal education and epigenetic age acceleration in the Simpkin *et al* paper [58] and no association with global methylation in two other papers [27, 50]. Tehranifar *et al.* found no association with LINE-1 or Alu methylation, but did observe higher blood Sat2 methylation among adults whose mothers had lower education compared with those whose mothers had at least a high school education [113]. Although one study found that maternal education was associated with cord blood *IGF2* methylation, but not with other imprinted genes [114], two other papers did not observe an association with *IGF2* methylation [38, 115]. However, in one of these papers an increase in *H19* methylation in cord blood of those with mothers who did not have a college education was reported [38].

In three papers using the same sample of 120 children aged 17 months, maternal education was correlated with *INSIGF* but not with *LEP* or *TNFA* blood methylation [64, 115, 122].

**Other markers of SEP:** No association was observed between family SEP measured by parental education and income at birth and 7 years, and blood measures of global DNA methylation in adults [60]. In a Columbian cohort of children aged 5–12 years, household socioeconomic stratum was not associated with blood LINE-1 methylation [50]. King *et al.* found that household income was associated with methylation at *MEG3* in cord blood, but not with other imprinted genes [114]. Results from a peer-reviewed abstract suggested that parental SEP was associated with DNA methylation in adipose tissue, but not blood of adult women as measured by Illumina Human-Methylation450 BeadChip [116].

Two papers using the same sample found preadolescent cumulative SEP risk (measured by family poverty, primary caregiver education, primary caregiver unemployment, single-parent family, receipt of assistance, and income) to be related to 2,032 loci at false discovery rate (FDR) <0.05 using data from the Illumina Human-Methylation450 BeadChip [117] and to specific CpG sites in *SLC6A4* [121].

Lam *et al.* used the Illumina Human-Methylation27 BeadChip to find three differentially methylated CpGs between adults with low early life SEP as defined by their parents occupation compared with high SEP [118]. Similarly, using a genome-wide approach, Borghol *et al.* found that childhood SEP as measured by father's occupation and access to household amenities, was associated with methylation at 1,252 gene promoters in blood measures of 45 year old adults [123]. In the multi-ethnic study of atherosclerosis study, there was no evidence for an association between childhood SEP and LINE-1 and Alu blood methylation in adulthood [120].

## Discussion

This systematic review identified 90 papers that examined the relationship between body size, nutrition and/or SEP in early life with epigenetic markers measured at the same time or after the exposure. DNAm was the epigenetic marker used in all of the included studies. There was no strong evidence for a consistent association between these early life variables and DNAm. This may be due to the heterogeneous study designs, data collection methods and statistical analyses. Despite these inconclusive results, the hypothesis that the early life environment can impact DNAm, potentially persisting into adult life, was supported by some studies and warrants further investigation.

There has been one previous non-systematic review examining the impact of body size, and/or nutrition and SEP on DNAm [15] and one systematic review examining the effect of breastfeeding [16]. Our search strategy was designed to be sensitive; therefore we captured a large number of initial papers and included substantially more papers than the previous reviews. We limited results to articles published in English which may have excluded relevant non-English language papers. There were slight differences in the papers included in our

systematic review compared with previous reviews. For instance, Demetriou *et al.* included RCTs and studies where DNAm was the exposure. Hartwig *et al.* included animal studies and studies of methQTLs. However, our overall conclusions are in line with these reviews.

Of the three exposures (body size, nutrition and SEP) examined in this review, the majority of papers investigated body size in early life particularly birth weight. Birth weight can be considered as a proxy for the *in utero* environment, which may subsume maternal diet and parental SEP. This time in the life course marks a period of rapid development during which epigenetic processes, including DNAm are becoming established [10]. Therefore, it is no surprise that this sensitive time period has been the subject of the majority of epigenetic studies to date. However, the results from these studies have been inconsistent and the direction of the association, particularly in cross-sectional studies, remains unclear. One of the interesting findings from the Dutch Hunger Famine study is that nutritional insults in early gestation are more sensitive to lasting changes in DNAm compared with later gestation. Using birth weight as a proxy for the entire gestational period may mask these time-specific effects. There are fewer studies on the impact of post-natal body size, nutrition and SEP. There is some weak and inconsistent evidence to support the impact of body composition, childhood body size, breastfeeding, intake and biomarkers of nutrition related methyl-donors in early life as well as SEP on DNAm that can last into later life. There is also evidence from intervention studies suggesting folic acid and fish oil supplementation during pregnancy or early life results in changes in DNAm [124–126], which were outside the scope of our review.

The inability to come to a conclusive interpretation based on studies in this systematic review is due to extensive heterogeneity in the study designs, statistical analyses and small sample sizes. This is no surprise given that the field of epigenetics in relation to life course epidemiology is in its infancy. Since DNAm can be influenced by stochastic, genetic and environmental exposures, effect sizes, even if they represent causal effects, are likely to be small and therefore difficult to find in small studies [11]. The sources of heterogeneity common to other systematic reviews of observational studies are a concern here. For example, there is inconsistency in how exposures were recorded or measured between the studies which may have introduced heterogeneity. Similarly, not all studies adjusted for the same confounding factors, nor are we clear about what those confounders should be. Of particular concern is the oversight of some relevant studies to control for maternal smoking which is to date the strongest known environmental exposure to impact DNA methylation [127], and cellular heterogeneity [128]. Another source of heterogeneity is the method through which studies account (or do not account) for multiple testing with some studies using a Bonferroni correction and others using false discovery rate. It has been argued that using a Bonferroni correction in epigenome wide association studies may be too conservative due to potential patterns of co-methylation [129]. However, the potential for false positives makes for cautious interpretation of any positive findings in studies which don't account appropriately for multiple testing. In addition, reproducibility of these findings will be an important goal for future research [128]. One of the unique characteristics of studying DNAm compared to genetics is that DNAm is tissue-specific [128]. The majority of studies included in this review have examined blood due to the ease of accessibility. It may be the case that the impact of e.g. nutrition in early life on DNAm may be more evident in adipose or other target tissues compared with blood.

A major limitation of all the studies is that knowledge of the epigenome, and DNAm, is still limited [128]. Most of the studies included in this review have focused on candidate genes, similar to how early genetic studies were carried out. A variety of assays were used to measure DNAm, which have been discussed in previous papers [129, 130]. As technology has advanced, the study of genome-wide methylation has increased. However, even the relatively advanced methods such as Illumina 450k (or the new 850k) covers an estimated <2% of the epigenome

[128]. This implies that sites of interest may be missed. These technological issues have been discussed extensively by Mill and Heijmans [128].

In addition to these statistical and technological issues, interpreting the functional consequences of some of the identified DNAm sites remains relatively unexplored, as is the potential impact of these DNAm changes on phenotypic health outcomes. A recent paper from the Dutch Hunger Famine study providing evidence that DNAm may mediate the link between adversity in early life and health outcomes in adulthood is one of the first to support this hypothesis [131].

In light of findings from this review and suggestions from previous commentaries [128, 132, 133], we propose the following recommendations for future studies: 1) use of longitudinal studies to assess the impact of early life environmental exposures on the dynamics of the epigenome through the life course 2) full consideration of statistical issues, such as adjustment for confounding, ensuring sufficient power, control for multiple testing, and reproducibility 3) control for cell heterogeneity and examine associations across different tissue types 4) assess the functional consequence of identified epigenetic marks through second-generation EWAS as part of an integrated functional genomics strategy 5) examine if DNAm mediates the relationship between early life exposures and health outcomes in later life and use of novel methods to assess causality e.g. Mendelian Randomisation.

Overall, evidence for the impact of body size, nutrition and/or SEP in early life on concurrent or subsequent DNAm is inconclusive. However, findings to date are supportive of the continued investigation using well designed studies which capitalise on emerging technologies to test these hypotheses. Whether these early life-mediated DNAm profiles translate into health outcomes in later life is something that should be incorporated into future studies.

## Supporting information

### **S1 Table. Search terms.**

(DOCX)

### **S2 Table. PRISMA 2009 checklist.**

(DOC)

## Author Contributions

**Conceptualization:** Jane Maddock, George B. Ploubidis, Rebecca Hardy.

**Data curation:** Jane Maddock.

**Formal analysis:** Jane Maddock.

**Funding acquisition:** George B. Ploubidis, Alissa Goodman, Jordana Bell, Diana Kuh, Rebecca Hardy.

**Investigation:** Jane Maddock, Wahyu Wulaningsih, Juan Castillo Fernandez, Rebecca Hardy.

**Methodology:** Jane Maddock, Rebecca Hardy.

**Supervision:** Jordana Bell, Rebecca Hardy.

**Writing – original draft:** Jane Maddock.

**Writing – review & editing:** Jane Maddock, Wahyu Wulaningsih, Juan Castillo Fernandez, George B. Ploubidis, Jordana Bell, Diana Kuh, Rebecca Hardy.

## References

1. Ben-Shlomo Y, Cooper R, Kuh D. The last two decades of life course epidemiology, and its relevance for research on ageing. *International Journal of Epidemiology*. 2016; 45(4):973–88. <https://doi.org/10.1093/ije/dyw096> PMID: 27880685
2. Ben-Shlomo Y, Kuh D. A life course approach to chronic disease epidemiology: conceptual models, empirical challenges and interdisciplinary perspectives. IEA; 2002.
3. Gluckman PD, Hanson MA, Cooper C, Thornburg KL. Effect of in utero and early-life conditions on adult health and disease. *New England Journal of Medicine*. 2008; 359(1):61–73. <https://doi.org/10.1056/NEJMra0708473> PMID: 18596274
4. Kuh D, Cooper R, Hardy R, Richards M, Ben-Shlomo Y. A life course approach to healthy ageing: OUP Oxford; 2013.
5. Ma Hanson, Gluckman P. Early developmental conditioning of later health and disease: physiology or pathophysiology? *Physiological reviews*. 2014; 94(4):1027–76. <https://doi.org/10.1152/physrev.00029.2013>
6. Galobardes B, Lynch JW, Smith GD. Childhood socioeconomic circumstances and cause-specific mortality in adulthood: systematic review and interpretation. *Epidemiologic reviews*. 2004; 26(1):7–21.
7. Poulton R, Caspi A, Milne BJ, Thomson WM, Taylor A, Sears MR, et al. Association between children's experience of socioeconomic disadvantage and adult health: a life-course study. *The lancet*. 2002; 360(9346):1640–5.
8. Mitchell C, Schnepfer LM, Notterman DA. DNA methylation, early life environment, and health outcomes. *Pediatric research*. 2015; 79(1–2):212–9. <https://doi.org/10.1038/pr.2015.193> PMID: 26466079
9. Jirtle RL, Skinner MK. Environmental epigenomics and disease susceptibility. *Nature reviews genetics*. 2007; 8(4):253–62. <https://doi.org/10.1038/nrg2045> PMID: 17363974
10. Feil R, Fraga MF. Epigenetics and the environment: emerging patterns and implications. *Nature Reviews Genetics*. 2012; 13(2):97–109. <https://doi.org/10.1038/nrg3142> PMID: 22215131
11. Relton CL, Smith GD. Is epidemiology ready for epigenetics?: IEA; 2012.
12. Jiménez-Chillaron JC, Díaz R, Martínez D, Pentinat T, Ramón-Krauel M, Ribó S, et al. The role of nutrition on epigenetic modifications and their implications on health. *Biochimie*. 2012; 94(11):2242–63. <https://doi.org/10.1016/j.biochi.2012.06.012> PMID: 22771843
13. Rosenfeld CS. Animal models to study environmental epigenetics. *Biology of reproduction*. 2010; 82(3):473–88. <https://doi.org/10.1095/biolreprod.109.080952> PMID: 19828779
14. Niculescu MD, Zeisel SH. Diet, methyl donors and DNA methylation: interactions between dietary folate, methionine and choline. *The Journal of nutrition*. 2002; 132(8):2333S–5S.
15. Demetriou CA, Veldhoven K, Relton C, Stringhini S, Kyriacou K, Vineis P. Biological embedding of early-life exposures and disease risk in humans: a role for DNA methylation. *European journal of clinical investigation*. 2015; 45(3):303–32. <https://doi.org/10.1111/eci.12406> PMID: 25645488
16. Hartwig FP, de Mola CL, Davies NM, Victora CG, Relton CL. Breastfeeding effects on DNA methylation in the offspring: A systematic literature review. *PloS one*. 2017; 12(3):e0173070. <https://doi.org/10.1371/journal.pone.0173070> PMID: 28257446
17. Maddock J, Wulaningsih W, Hardy R. Impact of body size, nutrition and socioeconomic position in early life on the epigenome: a systematic review protocol. *Systematic reviews*. 2017; 6(1):129. <https://doi.org/10.1186/s13643-017-0521-8> PMID: 28679412
18. Krieger N, Williams DR, Moss NE. Measuring social class in US public health research: concepts, methodologies, and guidelines. *Annual Review of Public Health*. 1997; 18(1):341–78.
19. Centre for Reviews and Dissemination. *Systematic Reviews: CRD's guidance for undertaking reviews in health care*. University of York; 2009.
20. Popay J, Roberts H, Sowden A, Petticrew M, Arai L, Rodgers M, et al. Guidance on the conduct of narrative synthesis in systematic reviews. A product from the ESRC methods programme Version. 2006; 1:b92.
21. Engel SM, Joubert BR, Wu MC, Olshan AF, Håberg SE, Ueland PM, et al. Neonatal genome-wide methylation patterns in relation to birth weight in the Norwegian Mother and Child Cohort. *American journal of epidemiology*. 2014; 179(7):834–42. <https://doi.org/10.1093/aje/kwt433> PMID: 24561991
22. Haworth KE, Farrell WE, Emes RD, Ismail KM, Carroll WD, Hubball E, et al. Methylation of the FGFR2 gene is associated with high birth weight centile in humans. *Epigenomics*. 2014; 6(5):477–91. <https://doi.org/10.2217/epi.14.40> PMID: 25431941



23. Turan N, Ghalwash MF, Katari S, Coutifaris C, Obradovic Z, Sapienza C. DNA methylation differences at growth related genes correlate with birth weight: a molecular signature linked to developmental origins of adult disease? *BMC medical genomics*. 2012; 5(1):10.
24. Adkins RM, Tylavsky FA, Krushkal J. Newborn umbilical cord blood DNA methylation and gene expression levels exhibit limited association with birth weight. *Chemistry & biodiversity*. 2012; 9(5):888–99.
25. Fryer AA, Emes RD, Ismail KM, Haworth KE, Mein C, Carroll WD, et al. Quantitative, high-resolution epigenetic profiling of CpG loci identifies associations with cord blood plasma homocysteine and birth weight in humans. *Epigenetics*. 2011; 6(1):86–94. <https://doi.org/10.4161/epi.6.1.13392> PMID: 20864804
26. Lee H, Jaffe AE, Feinberg JI, Tryggvadottir R, Brown S, Montano C, et al. DNA methylation shows genome-wide association of NFIX, RAPGEF2 and MSRB3 with gestational age at birth. *International journal of epidemiology*. 2012; 41(1):188–99. <https://doi.org/10.1093/ije/dyr237> PMID: 22422452
27. Herbstman JB, Wang S, Perera FP, Lederman SA, Vishnevetsky J, Rundle AG, et al. Predictors and consequences of global DNA methylation in cord blood and at three years. *PLoS one*. 2013; 8(9): e72824. <https://doi.org/10.1371/journal.pone.0072824> PMID: 24023780
28. Nomura Y, Lambertini L, Rialdi A, Lee M, Mystal EY, Grabie M, et al. Global methylation in the placenta and umbilical cord blood from pregnancies with maternal gestational diabetes, preeclampsia, and obesity. *Reproductive sciences*. 2014; 21(1):131–7. <https://doi.org/10.1177/1933719113492206> PMID: 23765376
29. Haggarty P, Hoad G, Horgan GW, Campbell DM. DNA methyltransferase candidate polymorphisms, imprinting methylation, and birth outcome. *PLoS One*. 2013; 8(7):e68896. <https://doi.org/10.1371/journal.pone.0068896> PMID: 23922667
30. Michels KB, Harris HR, Barault L. Birthweight, maternal weight trajectories and global DNA methylation of LINE-1 repetitive elements. *PLoS One*. 2011; 6(9):e25254. <https://doi.org/10.1371/journal.pone.0025254> PMID: 21980406
31. Nafee T, Karpova E, Farrell W, Fryer A, Carroll W, Emes R, et al. Dna methylation in cord blood, fetal plasma homocysteine, and fetal growth-A pilot study. *Bjog: An International Journal of Obstetrics and Gynaecology*. 2009; 116(10):1412.
32. Burris HH, Braun JM, Byun H-M, Tarantini L, Mercado A, Wright RJ, et al. Association between birth weight and DNA methylation of IGF2, glucocorticoid receptor and repetitive elements LINE-1 and Alu. 2013.
33. Bouwland-Both MI, van Mil NH, Stolk L, Eilers PH, Verbiest MM, Heijmans BT, et al. DNA methylation of IGF2DMR and H19 is associated with fetal and infant growth: the generation R study. *PLoS One*. 2013; 8(12):e81731. <https://doi.org/10.1371/journal.pone.0081731> PMID: 24349121
34. Qian YY, Huang XL, Liang H, Zhang ZF, Xu JH, Chen JP, et al. Effects of maternal folic acid supplementation on gene methylation and being small for gestational age. *Journal of Human Nutrition and Dietetics*. 2016; 29(5):643–51. <https://doi.org/10.1111/jhn.12369> PMID: 27230729
35. Hoyo C, Daltveit AK, Iversen E, Benjamin-Neelon SE, Fuemmeler B, Schildkraut J, et al. Erythrocyte folate concentrations, CpG methylation at genomically imprinted domains, and birth weight in a multi-ethnic newborn cohort. *Epigenetics*. 2014; 9(8):1120–30. <https://doi.org/10.4161/epi.29332> PMID: 24874916
36. Hoyo C, Fortner K, Murtha AP, Schildkraut JM, Soubry A, Demark-Wahnefried W, et al. Association of cord blood methylation fractions at imprinted insulin-like growth factor 2 (IGF2), plasma IGF2, and birth weight. *Cancer Causes & Control*. 2012; 23(4):635–45.
37. Liu Y, Murphy SK, Murtha AP, Fuemmeler BF, Schildkraut J, Huang Z, et al. Depression in pregnancy, infant birth weight and DNA methylation of imprint regulatory elements. *Epigenetics*. 2012; 7(7):735–46. <https://doi.org/10.4161/epi.20734> PMID: 22677950
38. Soubry A, Murphy S, Huang Z, Murtha A, Schildkraut J, Jirtle R, et al. The effects of depression and use of antidepressive medicines during pregnancy on the methylation status of the IGF2 imprinted control regions in the offspring. *Clinical epigenetics*. 2011; 3(1):2.
39. Su R, Wang C, Feng H, Lin L, Liu X, Wei Y, et al. Alteration in expression and methylation of IGF2/H19 in placenta and umbilical cord blood are associated with macrosomia exposed to intrauterine hyperglycemia. *PLoS one*. 2016; 11(2):e0148399. <https://doi.org/10.1371/journal.pone.0148399> PMID: 26840070
40. Vidal A, Murphy S, Murtha A, Schildkraut J, Soubry A, Huang Z, et al. Associations between antibiotic exposure during pregnancy, birth weight and aberrant methylation at imprinted genes among offspring. *International journal of obesity (2005)*. 2013; 37(7):907.

41. Zhang S, Zhai G, Wang J, Shi W, Zhang R, Chen C. IGF-II expression and methylation in small for gestational age infants. *Journal of Pediatric Endocrinology and Metabolism*. 2015; 28(5–6):613–8. <https://doi.org/10.1515/jpem-2014-0269> PMID: 25503665
42. Ghosh J, Mainigi M, Coutifaris C, Sapienza C. Outlier DNA methylation levels as an indicator of environmental exposure and risk of undesirable birth outcome. *Human molecular genetics*. 2015; 25(1):123–9. <https://doi.org/10.1093/hmg/ddv458> PMID: 26566672
43. Azzi S, Sas TC, Koudou Y, Le Bouc Y, Souberbielle J-C, Dargent-Molina P, et al. Degree of methylation of ZAC1 (PLAGL1) is associated with prenatal and post-natal growth in healthy infants of the EDEN mother child cohort. *Epigenetics*. 2014; 9(3):338–45. <https://doi.org/10.4161/epi.27387> PMID: 24316753
44. Burris HH, Baccarelli AA, Byun H-M, Cantoral A, Just AC, Pantic I, et al. Offspring DNA methylation of the aryl-hydrocarbon receptor repressor gene is associated with maternal BMI, gestational age, and birth weight. *Epigenetics*. 2015; 10(10):913–21. <https://doi.org/10.1080/15592294.2015.1078963> PMID: 26252179
45. Haworth KE, Farrell WE, Emes RD, Ismail KM, Carroll WD, Borthwick H-AD, et al. Combined influence of gene-specific cord blood methylation and maternal smoking habit on birth weight. 2013.
46. Mulligan C, D'Errico N, Stees J, Hughes D. Methylation changes at NR3C1 in newborns associate with maternal prenatal stress exposure and newborn birth weight. *Epigenetics*. 2012; 7(8):853–7. <https://doi.org/10.4161/epi.21180> PMID: 22810058
47. Pan H, Lin X, Wu Y, Chen L, Teh AL, Soh SE, et al. HIF3A association with adiposity: the story begins before birth. 2015.
48. Lesueur C, Armstrong DA, Paquette AG, Koestler DC, Padbury JF, Marsit CJ. Tissue-specific Leptin promoter DNA methylation is associated with maternal and infant perinatal factors. *Molecular and cellular endocrinology*. 2013; 381(1):160–7.
49. Almén MS, Jacobsson JA, Moschonis G, Benedict C, Chrousos GP, Fredriksson R, et al. Genome wide analysis reveals association of a FTO gene variant with epigenetic changes. *Genomics*. 2012; 99(3):132–7. <https://doi.org/10.1016/j.ygeno.2011.12.007> PMID: 22234326
50. Perng W, Rozek LS, Mora-Plazas M, Duchin O, Marin C, Forero Y, et al. Micronutrient status and global DNA methylation in school-age children. *Epigenetics*. 2012; 7(10):1133–41. <https://doi.org/10.4161/epi.21915> PMID: 22918385
51. Ouni M, Castell AL, Rothenbuhler A, Linglart A, Bougnères P. Higher methylation of the IGF1 P2 promoter is associated with idiopathic short stature. *Clinical endocrinology*. 2016; 84(2):216–21. <https://doi.org/10.1111/cen.12867> PMID: 26218795
52. Ouni M, Gunes Y, Belot M-P, Castell A-L, Fradin D, Bougnères P. The IGF1 P2 promoter is an epigenetic QTL for circulating IGF1 and human growth. *Clinical epigenetics*. 2015; 7(1):22.
53. Hernandez-Valero M, Rother J, Gorlov I, Frazier M, Gorlova O. Interplay between polymorphisms and methylation in the H19/IGF2 gene region may contribute to obesity in Mexican-American children. *Journal of developmental origins of health and disease*. 2013; 4(6):499–506. <https://doi.org/10.1017/S204017441300041X> PMID: 24575294
54. Gardner K, Sapienza C, Fisher J. Genetic and epigenetic associations to obesity-related appetite phenotypes among African-American children. *Pediatric obesity*. 2015; 10(6):476–82. <https://doi.org/10.1111/ijpo.12010> PMID: 25779370
55. Agha G, Hajj H, Rifas-Shiman SL, Just AC, Hivert M-F, Burris HH, et al. Birth weight-for-gestational age is associated with DNA methylation at birth and in childhood. *Clinical epigenetics*. 2016; 8(1):118.
56. Broholm C, Olsson AH, Perfilyev A, Hansen NS, Schrölkamp M, Strasko KS, et al. Epigenetic programming of adipose-derived stem cells in low birthweight individuals. *Diabetologia*. 2016; 59(12):2664–73. <https://doi.org/10.1007/s00125-016-4099-9> PMID: 27627980
57. Simpkin AJ, Suderman M, Gaunt TR, Lyttleton O, McArdle WL, Ring SM, et al. Longitudinal analysis of DNA methylation associated with birth weight and gestational age. *Human molecular genetics*. 2015; 24(13):3752–63. <https://doi.org/10.1093/hmg/ddv119> PMID: 25869828
58. Simpkin AJ, Hemani G, Suderman M, Gaunt TR, Lyttleton O, McArdle WL, et al. Prenatal and early life influences on epigenetic age in children: a study of mother–offspring pairs from two cohort studies. *Human molecular genetics*. 2015; 25(1):191–201. <https://doi.org/10.1093/hmg/ddv456> PMID: 26546615
59. Rerkasem K, Rattanatanyong P, Rerkasem A, Wongthanee A, Rungruengthanakit K, Mangklabruks A, et al. Higher alu methylation levels in catch-up growth in twenty-year-old offsprings. *PloS one*. 2015; 10(3):e0120032. <https://doi.org/10.1371/journal.pone.0120032> PMID: 25807557

60. Terry MB, Ferris JS, Pilsner R, Flom JD, Tehranifar P, Santella RM, et al. Genomic DNA methylation among women in a multiethnic New York City birth cohort. *Cancer Epidemiology and Prevention Biomarkers*. 2008; 17(9):2306–10.
61. Drake AJ, McPherson RC, Godfrey KM, Cooper C, Lillycrop KA, Hanson MA, et al. An unbalanced maternal diet in pregnancy associates with offspring epigenetic changes in genes controlling glucocorticoid action and foetal growth. *Clinical endocrinology*. 2012; 77(6):808–15. <https://doi.org/10.1111/j.1365-2265.2012.04453.x> PMID: 22642564
62. Steegers-Theunissen RP, Obermann-Borst SA, Kremer D, Lindemans J, Siebel C, Steegers EA, et al. Periconceptional maternal folic acid use of 400 µg per day is related to increased methylation of the IGF2 gene in the very young child. *PLoS one*. 2009; 4(11):e7845. <https://doi.org/10.1371/journal.pone.0007845> PMID: 19924280
63. Wehkalampi K, Muurinen M, Wirta SB, Hannula-Jouppi K, Hovi P, Järvenpää A-L, et al. Altered methylation of IGF2 locus 20 years after preterm birth at very low birth weight. *PLoS One*. 2013; 8(6):e67379. <https://doi.org/10.1371/journal.pone.0067379> PMID: 23840686
64. Obermann-Borst SA, Eilers PH, Tobi EW, de Jong FH, Slagboom PE, Heijmans BT, et al. Duration of breastfeeding and gender are associated with methylation of the LEPTIN gene in very young children. *Pediatric research*. 2013; 74(3):344–9. <https://doi.org/10.1038/pr.2013.95> PMID: 23884163
65. Tao M-H, Marian C, Shields PG, Potischman N, Nie J, Krishnan SS, et al. Exposures in early life: associations with DNA promoter methylation in breast tumors. *Journal of developmental origins of health and disease*. 2013; 4(2):182–90. <https://doi.org/10.1017/S2040174412000694> PMID: 25054684
66. Rangel M, dos Santos JC, Ortiz PHL, Hirata M, Jasiulionis MG, Araujo RC, et al. Modification of epigenetic patterns in low birth weight children: importance of hypomethylation of the ACE gene promoter. *PLoS One*. 2014; 9(8):e106138. <https://doi.org/10.1371/journal.pone.0106138> PMID: 25170764
67. Groom A, Potter C, Swan DC, Fatemifar G, Evans DM, Ring SM, et al. Postnatal growth and DNA methylation are associated with differential gene expression of the TACSTD2 gene and childhood fat mass. *Diabetes*. 2012; 61(2):391–400. <https://doi.org/10.2337/db11-1039> PMID: 22190649
68. Chen M, Baumbach J, Vandin F, Röttger R, Barbosa E, Dong M, et al. Differentially Methylated Genomic Regions in Birth-Weight Discordant Twin Pairs. *Annals of human genetics*. 2016; 80(2):81–7. <https://doi.org/10.1111/ahg.12146> PMID: 26831219
69. Tan Q, Frost M, Heijmans BT, von Bornemann Hjelmberg J, Tobi EW, Christensen K, et al. Epigenetic signature of birth weight discordance in adult twins. *BMC genomics*. 2014; 15(1):1062.
70. Tsai P-C, Van Dongen J, Tan Q, Willemsen G, Christiansen L, Boomsma DI, et al. DNA methylation changes in the IGF1R gene in birth weight discordant adult monozygotic twins. *Twin Research and Human Genetics*. 2015; 18(6):635–46. <https://doi.org/10.1017/thg.2015.76> PMID: 26563994
71. Casey KF, Levesque ML, Szyf M, Ismaylova E, Verner MP, Suderman M, et al. Birth weight discordance, DNA methylation, and cortical morphology of adolescent monozygotic twins. *Human brain mapping*. 2017; 38(4):2037–50. <https://doi.org/10.1002/hbm.23503> PMID: 28032437
72. Baird PN, Dirani M, Richardson AJ, Schache M, Morahan J, Ebers GC, et al. An Epigenetic Study of Monozygotic Twin Pairs Discordant for Birth-Weight. *Investigative Ophthalmology & Visual Science*. 2011; 52(14):3310–.
73. Gordon L, Joo JE, Powell JE, Ollikainen M, Novakovic B, Li X, et al. Neonatal DNA methylation profile in human twins is specified by a complex interplay between intrauterine environmental and genetic factors, subject to tissue-specific influence. *Genome research*. 2012; 22(8):1395–406. <https://doi.org/10.1101/gr.136598.111> PMID: 22800725
74. Córdova-Palamera A, Alemany S, Fatjó-Vilas M, Goldberg X, Leza JC, González-Pinto A, et al. Birth weight, working memory and epigenetic signatures in IGF2 and related genes: a MZ twin study. *PLoS one*. 2014; 9(8):e103639. <https://doi.org/10.1371/journal.pone.0103639> PMID: 25171170
75. Souren NY, Lutsik P, Gasparoni G, Tierling S, Gries J, Riemenschneider M, et al. Adult monozygotic twins discordant for intra-uterine growth have indistinguishable genome-wide DNA methylation profiles. *Genome biology*. 2013; 14(5):R44. <https://doi.org/10.1186/gb-2013-14-5-r44> PMID: 23706164
76. Mill J, Dempster E, Caspi A, Williams B, Moffitt T, Craig I. Evidence for monozygotic twin (MZ) discordance in methylation level at two CpG sites in the promoter region of the catechol-O-methyltransferase (COMT) gene. *American Journal of Medical Genetics Part B: Neuropsychiatric Genetics*. 2006; 141(4):421–5.
77. Simpkin AJ, Suderman M, Gaunt TR, Lyttleton O, McArdle WL, Ring SM, et al. Longitudinal analysis of DNA methylation associated with birth weight and gestational age. *Human Molecular Genetics*. 2015; 24:3752–63. <https://doi.org/10.1093/hmg/ddv119> PMID: 25869828.
78. Wehkalampi K, Muurinen M, Wirta SB, Hannula-Jouppi K, Hovi P, Jarvenpaa A-LL, et al. Altered Methylation of IGF2 Locus 20 Years after Preterm Birth at Very Low Birth Weight. *PLoS ONE*. 2013; 8(6) (no e67379. <https://doi.org/10.1371/journal.pone.0067379> PMID: 23840686.



79. Rangel M, dos Santos JC, Lima Ortiz PH, Hirata M, Jasiulionis MG, Araujo RC, et al. Modification of epigenetic patterns in low birth weight children: Importance of hypomethylation of the ACE gene promoter. *PLoS ONE*. 2014; 9:e106138. <http://dx.doi.org/10.1371/journal.pone.0106138>. PMID: [25170764](https://pubmed.ncbi.nlm.nih.gov/25170764/).
80. Nomura Y, Lambertini L, Ly J, Finik J, Huynh N, Dineva M, et al. Global methylation in placenta and umbilical cord blood from pregnancies with metabolic syndromes and the effect on birth outcomes. *American Journal of Obstetrics and Gynecology*. 2014;1(S161). <http://dx.doi.org/10.1016/j.ajog.2013.10.341>. PMID: [71275686](https://pubmed.ncbi.nlm.nih.gov/71275686/).
81. Haggarty P, Hoad G, Campbell DM, Horgan GW, Piyathilake C, McNeill G. Folate in pregnancy and imprinted gene and repeat element methylation in the offspring. *The American journal of clinical nutrition*. 2013; 97(1):94–9. [10.3945/ajcn.112.042572](https://doi.org/10.3945/ajcn.112.042572) PMID: [23151531](https://pubmed.ncbi.nlm.nih.gov/23151531/)
82. Pan H, Lin X, Wu Y, Chen L, Teh AL, Soh SE, et al. HIF3A association with adiposity: the story begins before birth. *Epigenomics*. 2015; 7:937–50. <http://dx.doi.org/10.2217/epi.15.45> PMID: [26011824](https://pubmed.ncbi.nlm.nih.gov/26011824/).
83. Ouni M, Castell AL, Rothenbuhler A, Linglart A, Bougneres P. Higher methylation of the IGF1 P2 promoter is associated with idiopathic short stature. *Clinical Endocrinology*. 2016; 84:216–21. <http://dx.doi.org/10.1111/cen.12867> PMID: [26218795](https://pubmed.ncbi.nlm.nih.gov/26218795/).
84. Burriss HH, Rifas-Shiman SL, Baccarelli A, Tarantini L, Boeke CE, Kleinman K, et al. Associations of long interspersed nuclear element-1 DNA methylation with preterm birth in a prospective cohort study. *Journal of developmental origins of health and disease*. 2012; 3(3):173–81. PMID: [22720130](https://pubmed.ncbi.nlm.nih.gov/22720130/)
85. Joubert BR, Herman T, Felix JF, Bohlin J, Ligthart S, Beckett E, et al. Maternal plasma folate impacts differential DNA methylation in an epigenome-wide meta-analysis of newborns. *Nature communications*. 2016; 7:10577. [10.1038/ncomms10577](https://doi.org/10.1038/ncomms10577) PMID: [26861414](https://pubmed.ncbi.nlm.nih.gov/26861414/)
86. Boeke CE, Baccarelli A, Kleinman KP, Burriss HH, Litonjua AA, Rifas-Shiman SL, et al. Gestational intake of methyl donors and global LINE-1 DNA methylation in maternal and cord blood: prospective results from a folate-replete population. *Epigenetics*. 2012; 7(3):253–60. [10.4161/epi.7.3.19082](https://doi.org/10.4161/epi.7.3.19082) PMID: [22430801](https://pubmed.ncbi.nlm.nih.gov/22430801/)
87. Pauwels S, Ghosh M, Duca RC, Bekaert B, Freson K, Huybrechts I, et al. Dietary and supplemental maternal methyl-group donor intake and cord blood DNA methylation. *Epigenetics*. 2017; 12(1):1–10. [10.1080/15592294.2016.1257450](https://doi.org/10.1080/15592294.2016.1257450) PMID: [27830979](https://pubmed.ncbi.nlm.nih.gov/27830979/)
88. Fryer AA, Nafee TM, Ismail KM, Carroll WD, Emes RD, Farrell WE. LINE-1 DNA methylation is inversely correlated with cord plasma homocysteine in man: a preliminary study. *Epigenetics*. 2009; 4(6):394–8. PMID: [19755846](https://pubmed.ncbi.nlm.nih.gov/19755846/)
89. McKay JA, Groom A, Potter C, Coneyworth LJ, Ford D, Mathers JC, et al. Genetic and non-genetic influences during pregnancy on infant global and site specific DNA methylation: role for folate gene variants and vitamin B12. *PLoS one*. 2012; 7(3):e33290. [10.1371/journal.pone.0033290](https://doi.org/10.1371/journal.pone.0033290) PMID: [22479380](https://pubmed.ncbi.nlm.nih.gov/22479380/)
90. Hoyo C, Murtha AP, Schildkraut JM, Jirtle RL, Demark-Wahnefried W, Forman MR, et al. Methylation variation at IGF2 differentially methylated regions and maternal folic acid use before and during pregnancy. *Epigenetics*. 2011; 6(7):928–36. [10.4161/epi.6.7.16263](https://doi.org/10.4161/epi.6.7.16263) PMID: [21636975](https://pubmed.ncbi.nlm.nih.gov/21636975/)
91. Loke YJ, Galati JC, Morley R, Joo EJ-H, Novakovic B, Li X, et al. Association of maternal and nutrient supply line factors with DNA methylation at the imprinted IGF2/H19 locus in multiple tissues of newborn twins. *Epigenetics*. 2013; 8(10):1069–79. [10.4161/epi.25908](https://doi.org/10.4161/epi.25908) PMID: [23917818](https://pubmed.ncbi.nlm.nih.gov/23917818/)
92. Adkins RM, Krushkal J, Zeisel S, Piyathilake C, Tylavsky F, Somes G. Association of genomewide newborn DNA methylation patterns with maternal and newborn characteristics. *BMC Bioinformatics*. 2010; 11(S4):O4.
93. Ba Y, Yu H, Liu F, Geng X, Zhu C, Zhu Q, et al. Relationship of folate, vitamin B12 and methylation of insulin-like growth factor-II in maternal and cord blood. *European journal of clinical nutrition*. 2011; 65(4):480. [10.1038/ejcn.2010.294](https://doi.org/10.1038/ejcn.2010.294) PMID: [21245875](https://pubmed.ncbi.nlm.nih.gov/21245875/)
94. McCullough LE, Miller EE, Mendez MA, Murtha AP, Murphy SK, Hoyo C. Maternal B vitamins: effects on offspring weight and DNA methylation at genomically imprinted domains. *Clinical epigenetics*. 2016; 8(1):8.
95. Dominguez-Salas P, Moore SE, Baker MS, Bergen AW, Cox SE, Dyer RA, et al. Maternal nutrition at conception modulates DNA methylation of human metastable epialleles. *Nature communications*. 2014; 5.
96. Godfrey KM, Sheppard A, Gluckman PD, Lillycrop KA, Burdge GC, McLean C, et al. Epigenetic gene promoter methylation at birth is associated with child's later adiposity. *Diabetes*. 2011; 60(5):1528–34. [10.2337/db10-0979](https://doi.org/10.2337/db10-0979) PMID: [21471513](https://pubmed.ncbi.nlm.nih.gov/21471513/)
97. Rossnerova A, Tulupova E, Tabashidze N, Schmutzerova J, Dostal M, Rossner P Jr, et al. Factors affecting the 27K DNA methylation pattern in asthmatic and healthy children from locations with

- various environments. *Mutation Research/Fundamental and Molecular Mechanisms of Mutagenesis*. 2013; 741:18–26. [10.1016/j.mrfmmm.2013.02.003](https://doi.org/10.1016/j.mrfmmm.2013.02.003) PMID: 23458556
98. Wijnands K, Obermann-Borst S, Steegers-Theunissen R. Early life lipid profile and metabolic programming in very young children. *Nutrition, Metabolism and Cardiovascular Diseases*. 2015; 25(6):608–14.
  99. Voisin S, Almén MS, Moschonis G, Chrousos GP, Manios Y, Schiöth HB. Dietary fat quality impacts genome-wide DNA methylation patterns in a cross-sectional study of Greek preadolescents. *European Journal of Human Genetics*. 2015; 23(5):654. [10.1038/ejhg.2014.139](https://doi.org/10.1038/ejhg.2014.139) PMID: 25074463
  100. de La Rocha C, Pérez-Mojica JE, Zenteno-De León S, Cervantes-Paz B, Tristán-Flores FE, Rodríguez-Ríos D, et al. Associations between whole peripheral blood fatty acids and DNA methylation in humans. *Scientific reports*. 2016; 6.
  101. Tobi EW, Slieker RC, Stein AD, Suchiman HED, Slagboom PE, van Zwet EW, et al. Early gestation as the critical time-window for changes in the prenatal environment to affect the adult human blood methylome. *International journal of epidemiology*. 2015; 44(4):1211–23. [10.1093/ije/dyv043](https://doi.org/10.1093/ije/dyv043) PMID: 25944819
  102. Finer S, Iqbal M, Lowe R, Ogunkolade B, Pervin S, Mathews C, et al. Is famine exposure during developmental life in rural Bangladesh associated with a metabolic and epigenetic signature in young adulthood? A historical cohort study. *BMJ open*. 2016; 6(11):e011768. [10.1136/bmjopen-2016-011768](https://doi.org/10.1136/bmjopen-2016-011768) PMID: 27881521
  103. Lumey L, Terry MB, Delgado-Cruzata L, Liao Y, Wang Q, Susser E, et al. Adult global DNA methylation in relation to pre-natal nutrition. *International journal of epidemiology*. 2012; 41(1):116–23. [10.1093/ije/dyr137](https://doi.org/10.1093/ije/dyr137) PMID: 22422450
  104. Heijmans BT, Tobi EW, Stein AD, Putter H, Blauw GJ, Susser ES, et al. Persistent epigenetic differences associated with prenatal exposure to famine in humans. *Proceedings of the National Academy of Sciences*. 2008; 105(44):17046–9.
  105. Tobi EW, Goeman JJ, Monajemi R, Gu H, Putter H, Zhang Y, et al. DNA methylation signatures link prenatal famine exposure to growth and metabolism. *Nature communications*. 2014; 5.
  106. Tobi EW, Lumey L, Talens RP, Kremer D, Putter H, Stein AD, et al. DNA methylation differences after exposure to prenatal famine are common and timing- and sex-specific. *Human molecular genetics*. 2009; 18(21):4046–53. [10.1093/hmg/ddp353](https://doi.org/10.1093/hmg/ddp353) PMID: 19656776
  107. Veenendaal M, Costello PM, Lillycrop KA, de Rooij SR, van der Post J, Bossuyt P, et al. Prenatal famine exposure, health in later life and promoter methylation of four candidate genes. *Journal of developmental origins of health and disease*. 2012; 3(6):450–7. [10.1017/S2040174412000396](https://doi.org/10.1017/S2040174412000396) PMID: 25084298
  108. Waterland RA, Kellermayer R, Laritsky E, Rayco-Solon P, Harris RA, Travisano M, et al. Season of conception in rural gambia affects DNA methylation at putative human metastable epialleles. *PLoS Genet*. 2010; 6(12):e1001252. [10.1371/journal.pgen.1001252](https://doi.org/10.1371/journal.pgen.1001252) PMID: 21203497
  109. Dolinoy DC, Das R, Weidman JR, Jirtle RL. Metastable epialleles, imprinting, and the fetal origins of adult diseases. *Pediatric research*. 2007; 61:30R–7R. [10.1203/pdr.0b013e31804575f7](https://doi.org/10.1203/pdr.0b013e31804575f7) PMID: 17413847
  110. Tobi EW, Slieker RC, Stein AD, Suchiman HED, Eline Slagboom P, Van Zwet EW, et al. Early gestation as the critical time-window for changes in the prenatal environment to affect the adult human blood methylome. *International Journal of Epidemiology*. 2015; 44:1211–23. <http://dx.doi.org/10.1093/ije/dyv043> PMID: 25944819
  111. Tobi EW, Goeman JJ, Monajemi R, Gu H, Putter H, Zhang Y, et al. DNA methylation signatures link prenatal famine exposure to growth and metabolism. *Nature Communications*. 2014; 5 (no pagi):5592. <http://dx.doi.org/10.1038/ncomms6592>. PMID: 602423831.
  112. Lumey L, Terry MB, Delgado-Cruzata L, Liao Y, Wang Q, Susser E, et al. Adult global DNA methylation in relation to pre-natal nutrition. *International journal of epidemiology*. 2011; 41(1):116–23. [10.1093/ije/dyr137](https://doi.org/10.1093/ije/dyr137) PMID: 22422450
  113. Tehranifar P, Wu H-C, Fan X, Flom JD, Ferris JS, Cho YH, et al. Early life socioeconomic factors and genomic DNA methylation in mid-life. *Epigenetics*. 2013; 8(1):23–7. [10.4161/epi.22989](https://doi.org/10.4161/epi.22989) PMID: 23196856
  114. King K, Murphy S, Hoyo C. Epigenetic regulation of Newborns' imprinted genes related to gestational growth: patterning by parental race/ethnicity and maternal socioeconomic status. *J Epidemiol Community Health*. 2015;jech-2014-204781.
  115. Obermann-Borst S, Heijmans B, Eilers P, Tobi E, Steegers E, Slagboom P, et al. Periconception maternal smoking and low education are associated with methylation of INSIGF in children at the age of 17 months. *Journal of developmental origins of health and disease*. 2012; 3(5):315–20. [10.1017/S2040174412000293](https://doi.org/10.1017/S2040174412000293) PMID: 25102259

116. Agha G, Houseman AE, Kelsey KT, Eaton CB, Buka SL, Loucks EB. Prenatal Socioeconomic Position is Associated with Adipose Tissue DNA Methylation in Women and Not Men. *Am Heart Assoc*; 2014.
117. Beach SR, Lei MK, Brody GH, Kim S, Barton AW, Dogan MV, et al. Parenting, socioeconomic status risk, and later young adult health: exploration of opposing indirect effects via DNA methylation. *Child development*. 2016; 87(1):111–21. [10.1111/cdev.12486](https://doi.org/10.1111/cdev.12486) PMID: 26822447
118. Lam LL, Emberly E, Fraser HB, Neumann SM, Chen E, Miller GE, et al. Factors underlying variable DNA methylation in a human community cohort. *Proceedings of the National Academy of Sciences*. 2012; 109(Supplement 2):17253–60.
119. Borghol N, Suderman M, McArdle W, Racine A, Hallett M, Pembrey M, et al. Associations with early-life socio-economic position in adult DNA methylation. *International journal of epidemiology*. 2011; 41(1):62–74. [10.1093/ije/dyr147](https://doi.org/10.1093/ije/dyr147) PMID: 22422449
120. Subramanyam MA, Diez-Roux AV, Pilsner JR, Villamor E, Donohue KM, Liu Y, et al. Social factors and leukocyte DNA methylation of repetitive sequences: the multi-ethnic study of atherosclerosis. *PloS one*. 2013; 8(1):e54018. [10.1371/journal.pone.0054018](https://doi.org/10.1371/journal.pone.0054018) PMID: 23320117
121. Beach SR, Dogan MV, Brody GH, Philibert RA. Differential impact of cumulative SES risk on methylation of protein–protein interaction pathways as a function of SLC6A4 genetic variation in African American young adults. *Biological psychology*. 2014; 96:28–34. [10.1016/j.biopsycho.2013.10.006](https://doi.org/10.1016/j.biopsycho.2013.10.006) PMID: 24192273
122. Wijnands KPJ, Obermann-Borst SA, Steegers-Theunissen RPM. Early life lipid profile and metabolic programming in very young children. *Nutrition, Metabolism and Cardiovascular Diseases*. 2015; 25:608–14. <http://dx.doi.org/10.1016/j.numecd.2015.02.010> PMID: 25840838.
123. Borghol N, Suderman M, McArdle W, Racine A, Hallett M, Pembrey M, et al. Associations with early-life socio-economic position in adult DNA methylation. *International journal of epidemiology*. 2012; 41(1):62–74. [10.1093/ije/dyr147](https://doi.org/10.1093/ije/dyr147) PMID: 22422449
124. Caffrey A, Irwin RE, McNulty H, Strain J, Lees-Murdock DJ, McNulty BA, et al. Gene-specific DNA methylation in newborns in response to folic acid supplementation during the second and third trimesters of pregnancy: epigenetic analysis from a randomized controlled trial. *The American journal of clinical nutrition*. 2018; 107(4):566–75. [10.1093/ajcn/nqx069](https://doi.org/10.1093/ajcn/nqx069) PMID: 29635492
125. Lind MV, Martino D, Harsløf LBS, Kyjovska Z, Kristensen M, Lauritzen L. Genome-wide identification of mononuclear cell DNA methylation sites potentially affected by fish oil supplementation in young infants: a pilot study. *Prostaglandins, Leukotrienes and Essential Fatty Acids (PLEFA)*. 2015; 101:1–7.
126. Lee H-S, Barraza-Villarreal A, Biessy C, Duarte-Salles T, Sly PD, Ramakrishnan U, et al. Dietary supplementation with polyunsaturated fatty acid during pregnancy modulates DNA methylation at IGF2/H19 imprinted genes and growth of infants. *Physiological genomics*. 2014; 46(23):851–7. [10.1152/physiolgenomics.00061.2014](https://doi.org/10.1152/physiolgenomics.00061.2014) PMID: 25293351
127. Lee KW, Pausova Z. Cigarette smoking and DNA methylation. *Frontiers in genetics*. 2013; 4.
128. Mill J, Heijmans BT. From promises to practical strategies in epigenetic epidemiology. *Nature Reviews Genetics*. 2013; 14(8):585–94. [10.1038/nrg3405](https://doi.org/10.1038/nrg3405) PMID: 23817309
129. Tsai P-C, Spector TD, Bell JT. Using epigenome-wide association scans of DNA methylation in age-related complex human traits. *Epigenomics*. 2012; 4(5):511–26. [10.2217/epi.12.45](https://doi.org/10.2217/epi.12.45) PMID: 23130833
130. Bell JT, Spector TD. A twin approach to unraveling epigenetics. *Trends in Genetics*. 2011; 27(3):116–25. [10.1016/j.tig.2010.12.005](https://doi.org/10.1016/j.tig.2010.12.005) PMID: 21257220
131. Tobi EW, Slieker RC, Luijk R, Dekkers KF, Stein AD, Xu KM, et al. DNA methylation as a mediator of the association between prenatal adversity and risk factors for metabolic disease in adulthood. *Science advances*. 2018; 4(1):eaao4364. [10.1126/sciadv.aao4364](https://doi.org/10.1126/sciadv.aao4364) PMID: 29399631
132. Lappalainen T, Grealley JM. Associating cellular epigenetic models with human phenotypes. *Nature Reviews Genetics*. 2017; 18(7):441. [10.1038/nrg.2017.32](https://doi.org/10.1038/nrg.2017.32) PMID: 28555657
133. Birney E, Smith GD, Grealley JM. Epigenome-wide association studies and the interpretation of disease-omics. *PLoS genetics*. 2016; 12(6):e1006105. [10.1371/journal.pgen.1006105](https://doi.org/10.1371/journal.pgen.1006105) PMID: 27336614
